# Supplementary material
Source: publisher figshare collection journal article supplement (https://acs.figshare.com/ndownloader/files/11428463)
Supplement: Supplementary file 1 [file 11428463]

Supporting information for

## **Cu<sup>I</sup>-Catalyzed Asymmetric [3+2] Cycloaddition of Azomethine Ylides with Cyclobutenones**

Javier Corpas,<sup>a, ‡</sup> Alberto Ponce,<sup>a, ‡</sup> Javier Adrio,<sup>\*, a, b</sup> and Juan C. Carretero<sup>\*, a, b</sup>

<sup>a</sup>Departamento de Química Orgánica, Facultad de Ciencias, Universidad Autónoma de Madrid, Cantoblanco, 28049 Madrid, Spain.

<sup>b</sup>Institute for Advanced Research in Chemical Sciences (IAdChem), Universidad Autónoma de Madrid, 28049 Madrid, Spain

### **Table of Contents**

|                                                                   |     |
|-------------------------------------------------------------------|-----|
| 1. General methods                                                | S2  |
| 2. Typical procedure for the asymmetric 1,3-dipolar cycloaddition | S3  |
| 3. Preparation of racemic products for HPLC analysis              | S15 |
| 4. Regiochemical and stereochemical assignment                    | S15 |
| 5. HPLC charts                                                    | S16 |
| 6. NMR spectra collection                                         | S27 |

## 1. General methods

All air- and moisture-sensitive manipulations were carried out in anhydrous solvents and under argon. Toluene, tetrahydrofuran and acetonitrile were dried over the *PureSolv MD* purification system. Melting points were taken in open-end capillary tubes. Reactions were monitored by thin-layer chromatography carried out on 0.25 mm silica gel plates (230-400 mesh). Flash column chromatographies were performed using silica gel (230-400 mesh). NMR spectra were recorded on 300 or 500 MHz instrument and calibrated using residual non-deuterated solvent ( $\text{CDCl}_3$  or benzene- $d_6$ ) as internal reference ( $\delta_H=7.26$  ppm,  $\delta_C=77.2$  ppm for  $\text{CDCl}_3$  and  $\delta_H=7.16$  ppm,  $\delta_C=128.5$  ppm for benzene- $d_6$ ). HRMS spectra were recorded on a TOF mass spectrometer with electrospray ionization (ES) as the ionization source. The chromatograms of the racemic and enantiomerically enriched cycloadducts were obtained by HPLC or SFC. Arylcyclobutenones **2a**, **2b**, **2c**, **2d**, and **2e** were prepared following the procedure reported in the literature.<sup>1</sup>  $\alpha$ -Iminoesters were prepared by condensation of methyl glycinate hydrochloride and the corresponding aldehydes.<sup>2</sup> Due to their lability, all  $\alpha$ -iminoesters once isolated were immediately used in the 1,3-dipolar cycloaddition without further purification.

---

1. Sugimoto, K.; Hayashi, R.; Nemoto, H.; Toyooka, N.; Matsuyama, Y. *Org. Lett.*, **2012**, *14*, 3510.

2. a) Cabrera, S.; Arrayás, R. G.; Carretero, J. C. *J. Am. Chem. Soc.* **2005**, *127*, 16394; b) Nájera, C.; Sansano, J. M. *Curr. Org. Chem.* **2003**, *7*, 1105; c) Cooper, D. M.; Grigg, R.; Hargreaves, S.; Kennewell, P.; Redpath, J. *Tetrahedron* **1995**, *51*, 7791.

## 2. Typical procedure for the asymmetric 1,3-dipolar cycloaddition.

### (1*S*, 3*R*, 3*aS*, 5*aR*)-Methyl-3,5*a*-diphenyl-4-(oxo)heptahydrocyclobuta[c]pyrrole-1-carboxylate (*endo*-**3a**).

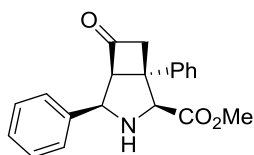

To a solution of  $[\text{Cu}(\text{CH}_3\text{CN})_4]\text{PF}_6$  (19.3 mg, 0.052 mmol) and (*R*)-Fesulphos (28.6 mg, 0.062 mmol) in toluene (8 mL), under nitrogen atmosphere, at 0 °C, a solution of  $\alpha$ -iminoester **1a** (368.2 mg, 2.08 mmol) in toluene (6.24 mL), KO<sup>t</sup>Bu (1M in THF) (208  $\mu$ l, 0.208 mmol) and a solution of 3-phenylcyclobutenone **2a** (150 mg, 1.04 mmol) in toluene (6 mL) were successively added. After 24h at 0 °C, the mixture was diluted with 50 mL of  $\text{CH}_2\text{Cl}_2$  and filtered through a plug of celite®. The solvent was evaporated under reduced pressure and the residue was purified by silica gel flash chromatography (cyclohexane/EtOAc 6:1) to afford the cycloadduct *endo*-**3a** (282.5 mg, 84%, colorless oil).

$[\alpha]_{\text{D}}^{20}$  : +35.8 ( $c=0.22$ ,  $\text{CHCl}_3$ ), 90% *ee*.

**SFC**: The enantiomeric excess was determined by SFC using a Chiralpak-ID-3 column [ $\text{CO}_2/\text{MeOH}$  from 95:5 to 60:40 in 8 min, 2.0 mL/min ( $\lambda = 230.4$  nm)]:  $t_{\text{R}} = 2.584$  min (1*R*, 3*S*, 3*aR*, 5*aS*)-**3a** and 3.072 min (1*S*, 3*R*, 3*aS*, 5*aR*)-**3a**.

**<sup>1</sup>H-NMR** (300 MHz,  $\text{CDCl}_3$ ):  $\delta$  7.46 – 7.30 (m, 10H), 4.73 (d,  $J = 7.3$  Hz, 1H), 4.21 (s, 1H), 3.92 (ddd,  $J = 7.2, 3.9, 2.1$  Hz, 1H), 3.73 (s, 3H), 3.53 (dd,  $J = 18.4, 2.1$  Hz, 1H), 3.43 (dd,  $J = 18.4, 3.9$  Hz, 1H).

**<sup>13</sup>C-NMR** (75 MHz,  $\text{CDCl}_3$ ):  $\delta$  205.1, 170.7, 142.2, 136.6, 128.7, 128.5, 128.2, 127.4, 127.3, 127.2, 71.3, 65.0, 56.9, 53.6, 52.2, 47.6.

**HRMS** (ESI<sup>+</sup>): calcd for  $\text{C}_{20}\text{H}_{20}\text{NO}_3$ , 322.1443; found, 322.1425 ( $[\text{M}+\text{H}]$ , 100).

### (1*S*, 3*R*, 3*aS*, 5*aR*)-Methyl-5*a*-phenyl-3-(4-methoxyphenyl)-4-(oxo)heptahydrocyclobuta[c]pyrrole-1-carboxylate (*endo*-**3b**).

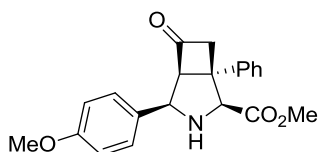

Following the typical procedure, the reaction of 3-phenylcyclobutenone **2a** (14.4mg, 0.1 mmol) and **1b** (41.4 mg, 0.2 mmol) afforded, after purification by silica gel flash chromatography (cyclohexane/EtOAc 6:1), the cycloadduct *endo*-**3b** (26.9 mg, 77%, yellow oil).

$[\alpha]_{\text{D}}^{20}$  : +44.8 ( $c=0.22$ ,  $\text{CHCl}_3$ ), 98% *ee*.

**HPLC**: The enantiomeric excess was determined by HPLC using a Daicel Chiralpak IB column, *n*-hexane/isopropanol 95:5, flow rate 0.7 mL/min ( $\lambda = 230.16$  nm):  $t_{\text{R}} = 81.2$  min

(1*R*, 3*S*, 3*aR*, 5*aS*)-**3b** and 103.1 min (1*S*, 3*R*, 3*aS*, 5*aR*)-**3b**.

**<sup>1</sup>H-NMR** (300 MHz, CDCl<sub>3</sub>): δ 7.46-7.28 (m, 7H), 6.89 (d, *J* = 8.5 Hz, 2H), 4.69 (d, *J* = 7.2 Hz, 1H), 4.20 (s, 1H), 3.91-3.83 (m, 1H), 3.81 (s, 3H), 3.73 (s, 3H), 3.57-3.48 (m, 1H), 3.42 (dd, *J* = 18.4, 3.8 Hz, 1H).

**<sup>13</sup>C-NMR** (75 MHz, CDCl<sub>3</sub>): δ 206.7, 170.9, 159.4, 142.4, 129.0, 128.7, 128.4, 127.5, 127.2, 113.9, 71.4, 64.7, 55.4, 53.6, 52.1, 47.7.

**HRMS** (ESI<sup>+</sup>): calcd for C<sub>21</sub>H<sub>22</sub>NO<sub>4</sub>, 352.1549; found, 352.1536 ([M+H], 100).

(1*S*, 3*R*, 3*aS*, 5*aR*)-Methyl-5*a*-phenyl-3-(4-chlorophenyl)-4(oxo)heptahydrocyclobuta[c]pyrrole-1-carboxylate (*endo*-**3c**).

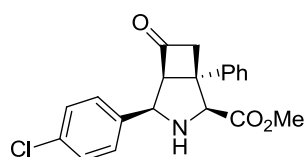

Following the typical procedure, the reaction of 3-phenylcyclobutenone **2a** (14.4mg, 0.1 mmol) and **1c** (42.3 mg, 0.2 mmol) afforded, after purification by silica gel flash chromatography (cyclohexane/EtOAc 6:1), the cycloadduct *endo*-**3c** (26.9 mg, 84%, white solid).

**M.p.:** 134-136 °C.

**[α]<sub>D</sub><sup>20</sup>:** +26.2 (c=0.22, CHCl<sub>3</sub>), 81% *ee*.

**HPLC:** The enantiomeric excess was determined by HPLC using a Daicel Chiralpak IB column, *n*-hexane/isopropanol 95:5, flow rate 0.7 mL/min (λ = 230.16 nm): *t<sub>R</sub>* = 53.0 min (1*R*, 3*S*, 3*aR*, 5*aS*)-**3c** and 61.1 min (1*S*, 3*R*, 3*aS*, 5*aR*)-**3c**.

**<sup>1</sup>H-NMR** (300 MHz, CDCl<sub>3</sub>): δ 7.44 – 7.30 (m, 9H), 4.70 (d, *J* = 7.1 Hz, 1H), 4.20 (s, 1H), 3.90 – 3.85 (m, 1H), 3.73 (s, 3H), 3.56-3.48 (m, 1H), 3.48-3.39 (m, 1H), 2.75 (bs, 1H).

**<sup>13</sup>C-NMR** (75 MHz, CDCl<sub>3</sub>): δ 205.7, 170.9, 159.4, 142.3, 128.9, 128.7, 128.3, 127.4, 127.1, 113.8, 71.3, 64.7, 55.3, 53.5, 52.1, 47.6.

**HRMS** (ESI<sup>+</sup>): calcd for C<sub>20</sub>H<sub>19</sub>NO<sub>3</sub>Cl, 356.1053; found, 356.1052 ([M+H], 100).

(1*S*, 3*R*, 3*aS*, 5*aR*)-Methyl-5*a*-phenyl-3-(4-methoxycarbonyl)phenyl-4(oxo)heptahydrocyclobuta[c]pyrrole-1-carboxylate (*endo*-**3d**).

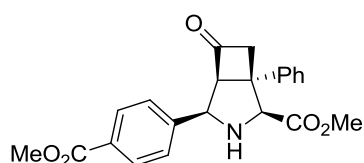

Following the typical procedure, the reaction of 3-phenylcyclobutenone **2a** (14.4mg, 0.1 mmol) and **1d** (47.0 mg, 0.2 mmol) afforded, after purification by silica gel flash chromatography (cyclohexane/EtOAc 6:1), the cycloadduct *endo*-**3d** (27.7 mg, 73%, yellow solid).

**M.p.:** 142-144 °C.

**$[\alpha]_D^{20}$**  : +19.3 (c=0.22, CHCl<sub>3</sub>), 85% *ee*.

**HPLC:** The enantiomeric excess was determined by HPLC using a Daicel Chiralpak IB column, *n*-hexane/isopropanol 95:5, flow rate 0.7 mL/min ( $\lambda$  = 230.16 nm):  $t_R$  = 32.8 min (1*R*, 3*S*, 3*aR*, 5*aS*)-**3d** and 35.6 min (1*S*, 3*R*, 3*aS*, 5*aR*)-**3d**.

**<sup>1</sup>H-NMR** (300 MHz, CDCl<sub>3</sub>):  $\delta$  7.91 (d, *J* = 8.9 Hz, 2H), 7.38 (d, *J* = 8.2 Hz, 2H), 7.30 – 7.26 (m, 4H), 7.13 (s, 1H), 4.65 (d, *J* = 7.0 Hz, 1H), 4.09 (s, 1H), 3.85-3.80 (m, 1H), 3.79 (s, 3H), 3.61 (s, 3H), 3.45-3.36 (m, 1H), 3.32 (dd, *J* = 18.6, 3.3 Hz, 1H), 2.66 (bs, 1H).

**<sup>13</sup>C-NMR** (75 MHz, CDCl<sub>3</sub>):  $\delta$  206.1, 170.7, 166.9, 142.4, 142.2, 129.8, 129.7, 128.7, 127.4, 127.3, 127.1, 76.0, 71.3, 64.5, 53.8, 52.18, 52.16, 47.4.

**HRMS** (ESI<sup>+</sup>): calcd for C<sub>22</sub>H<sub>22</sub>NO<sub>5</sub>, 380.1498; found, 380.1498 ([M+H], 100).

**(1*S*, 3*R*, 3*aS*, 5*aR*)-Methyl-5*a*-phenyl-3-(3-methoxyphenyl)-4(oxo)heptahydrocyclobuta[c]-pyrrole-1-carboxylate (*endo*-**3e**).**

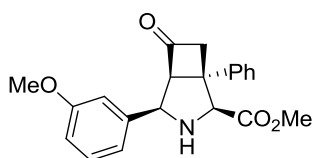

Following the typical procedure, the reaction of 3-phenylcyclobutenone **2a** (14.4mg, 0.1 mmol) and **1e** (41.4 mg, 0.2 mmol) afforded, after purification by silica gel flash chromatography (cyclohexane/EtOAc 6:1), the cycloadduct *endo*-**3e** (27.1 mg, 72%, yellow oil).

**$[\alpha]_D^{20}$**  : +48.6 (c=0.22, CHCl<sub>3</sub>), 85% *ee*.

**HPLC:** The enantiomeric excess was determined by HPLC using a Daicel Chiralpak IB column, *n*-hexane/isopropanol 95:5, flow rate 0.7 mL/min ( $\lambda$  = 210.8 nm):  $t_R$  = 142.5 min (1*S*, 3*R*, 3*aS*, 5*aR*)-**3e** and 215.8 min (1*R*, 3*S*, 3*aR*, 5*aS*)-**3e**.

**<sup>1</sup>H-NMR** (300 MHz, CDCl<sub>3</sub>):  $\delta$  7.45-7.38 (m, 4H), 7.36-7.24 (m, 2H), 7.04-6.96 (m, 2H), 6.88-6.81 (m, 1H), 4.70 (d, *J* = 7.1 Hz, 1H), 4.19 (s, 1H), 3.93 – 3.86 (m, 1H), 3.82 (s, 3H), 3.73 (s, 3H), 3.59-3.48 (m, 1H), 3.42 (dd, *J* = 18.5, 3.7 Hz, 1H), 2.77 (bs, 1H).

**<sup>13</sup>C-NMR** (75 MHz, CDCl<sub>3</sub>):  $\delta$  205.3, 170.8, 159.7, 142.3, 138.7, 129.4, 128.7, 127.4, 127.2, 119.4, 113.5, 112.8, 76.6, 71.3, 64.9, 55.3, 53.6, 52.1, 47.5.

**HRMS** (ESI<sup>+</sup>): calcd for C<sub>21</sub>H<sub>22</sub>NO<sub>4</sub>, 352.1549; found, 352.1542 ([M+H], 100).

**(1*S*, 3*R*, 3*aS*, 5*aR*)-Methyl-5*a*-phenyl-3-(3-methylphenyl)-4-(oxo)heptahydrocyclobuta[c]pyrrole-1-carboxylate (*endo*-**3f**).**

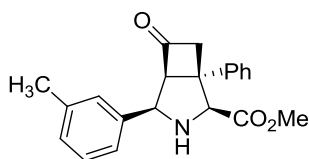

Following the typical procedure, the reaction of 3-phenylcyclobutenone **2a** (14.4mg, 0.1 mmol) and **1f** (38.2 mg, 0.2 mmol) afforded, after purification by silica gel flash chromatography (cyclohexane/EtOAc 6:1), the cycloadduct *endo*-**3f** (27.9 mg, 84%, colorless oil).

$[\alpha]_D^{20}$ : +74.4 ( $c=0.22$ ,  $\text{CHCl}_3$ ), 86% *ee*.

**SFC:** The enantiomeric excess was determined by SFC using a Chiralpak ID-3 column [ $\text{CO}_2/\text{MeOH}$  95:5 in 60 min, flow rate 2.0 mL/min ( $\lambda = 210.4$  nm)]:  $t_R = 4.996$  min (1*R*, 3*S*, 3*aR*, 5*aS*)-**3f** and 8.527 min (1*S*, 3*R*, 3*aS*, 5*aR*)-**3f**.

**$^1\text{H-NMR}$**  (300 MHz,  $\text{CDCl}_3$ ):  $\delta$  7.21-7.16 (m, 1H), 7.15-7.04 (m, 7H), 7.00 –6.95 (m, 1H), 4.55 (d,  $J = 7.2$  Hz, 1H), 4.05 (s, 1H), 3.78-3.73 (m, 1H), 3.59 (s, 3H), 3.38 (dd,  $J = 18.5, 1.9$  Hz, 1H), 3.28 (dd,  $J = 18.5, 3.9$  Hz, 1H), 2.61 (bs, 1H), 2.22 (s, 3H).

**$^{13}\text{C-NMR}$**  (75 MHz,  $\text{CDCl}_3$ ):  $\delta$  205.4, 170.9, 142.3, 138.0, 136.9, 128.9, 128.7, 128.3, 127.7, 127.4, 127.2, 124.2, 71.4, 65.0, 53.6, 52.1, 47.6, 29.8, 21.6.

**HRMS** (ESI<sup>+</sup>): calcd for  $\text{C}_{21}\text{H}_{22}\text{NO}_3$ , 336.1594; found, 336.1600 ( $[\text{M}+\text{H}]$ , 100).

**(1*S*, 3*R*, 3*aS*, 5*aR*)-Methyl-5*a*-phenyl-3-(2-bromophenyl)-4-(oxo)heptahydrocyclobuta[c]-pyrrole-1-carboxylate (*endo*-**3g**).**

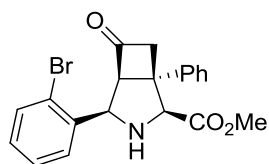

Following the typical procedure, the reaction of 3-phenylcyclobutenone **2a** (14.4mg, 0.1 mmol) and **1g** (51.2 mg, 0.2 mmol) afforded, after purification by silica gel flash chromatography (cyclohexane/EtOAc 6:1), the cycloadduct *endo*-**3g** (30.0 mg, 72%, white solid).

**M.p.:** 150-152 °C.

$[\alpha]_D^{20}$ : +70.2 ( $c=0.22$ ,  $\text{CHCl}_3$ ), 92% *ee*.

**SFC:** The enantiomeric excess was determined by SFC using a Chiralpak-ID-3 column [ $\text{CO}_2/\text{MeOH}$  from 95:5 to 60:40 in 8 min, 2.0 mL/min ( $\lambda = 230.4$  nm)]:  $t_R = 2.411$  min (1*R*, 3*S*, 3*aR*, 5*aS*)-**3g** and 2.866 min (1*S*, 3*R*, 3*aS*, 5*aR*)-**3g**.

**$^1\text{H-NMR}$**  (300 MHz,  $\text{CDCl}_3$ ):  $\delta$  7.68 (dd,  $J = 7.9, 1.6$  Hz, 1H), 7.57 (dd,  $J = 7.9, 1.6$  Hz, 1H), 7.49-7.43 (m, 4H), 7.37 – 7.28 (m, 2H), 7.18 (td,  $J = 7.7, 1.7$  Hz, 1H), 4.98 (d,  $J = 6.8$  Hz, 1H), 4.21 (s, 1H), 4.18 (ddd,  $J = 6.8, 3.4, 1.9$  Hz, 1H), 3.74 (s, 3H), 3.52 (dd,  $J = 18.4, 1.9$  Hz, 1H), 3.43 (dd,  $J = 18.4, 3.4$  Hz, 1H), 2.62 (bs, 1H).

**$^{13}\text{C}$ -NMR** (75 MHz,  $\text{CDCl}_3$ ):  $\delta$  205.5 , 170.9 , 142.6 , 136.5 , 132.7 , 129.5 , 128.7 , 128.6, 127.6 , 127.2 , 123.2 , 73.1 , 70.8 , 63.6 , 54.0, 52.1 , 46.9.

**HRMS** (ESI+): calcd for  $\text{C}_{20}\text{H}_{19}\text{NO}_3\text{Br}$ , 400.0548; found, 400.0518 ( $[\text{M}+\text{H}]$ , 100).

**(1*S*, 3*R*, 3*aS*, 5*aR*)-Methyl-5*a*-phenyl-3-(1-naphthyl)-4-(oxo)heptahydrocyclobuta[c]pyrrole-1-carboxylate (*endo*-3*h*).**

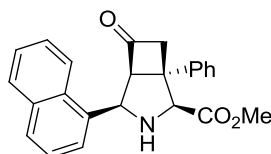

Following the typical procedure, the reaction of 3-phenylcyclobutenone **2a** (14.4mg, 0.1 mmol) and **1h** (45.4 mg, 0.2 mmol) afforded, after purification by silica gel flash chromatography (cyclohexane/EtOAc 6:1), the cycloadduct *endo*-**3h** (33.4 mg, 90%, white solid).

**M.p.:** 108-110 °C.

**$[\alpha]_{\text{D}}^{20}$**  : +23.4 ( $c=0.22$ ,  $\text{CHCl}_3$ ), 97% *ee*.

**SFC:** The enantiomeric excess was determined by SFC using a Chiralpak-ID-3 column [ $\text{CO}_2/\text{MeOH}$  from 95:5 to 60:40 in 8 min, 2.0 mL/min ( $\lambda = 230.4$  nm)]:  $t_{\text{R}} = 3.597$  min (1*R*, 3*S*, 3*aR*, 5*aS*)-**3h** and 4.319 (min) (1*S*, 3*R*, 3*aS*, 5*aR*)-**3h**.

**$^1\text{H}$ -NMR** (300 MHz,  $\text{CDCl}_3$ ):  $\delta$  8.01-7.81 (m, 5H), 7.58-7.35 (m, 7H), 7.45-7.34 (m, 7H), 5.43 (d,  $J = 6.9$  Hz, 1H), 4.34 (s, 1H), 4.20-4.14 (m, 1H), 3.77 (s, 3H), 3.57 (dd,  $J = 18.4$ , 2.5 Hz, 1H), 3.44 (dd,  $J = 18.4$ , 3.9 Hz, 1H).

**$^{13}\text{C}$ -NMR** (75 MHz,  $\text{CDCl}_3$ ):  $\delta$  205.1, 171.0, 142.6, 133.8, 132.7, 130.9, 129.5, 128.8, 128.5, 127.6, 127.3, 126.4, 125.7, 125.6, 124.0, 122.2, 74.9, 70.9, 60.8, 54.0, 52.2, 47.3.

**HRMS** (ESI+): calcd for  $\text{C}_{24}\text{H}_{22}\text{NO}_3$ , 372.1600; found, 372.1609 ( $[\text{M}+\text{H}]$ , 100).

**(1*S*, 3*R*, 3*aS*, 5*aR*)-Methyl-5*a*-phenyl-3-(furan-2-yl)-4-(oxo)heptahydrocyclobuta[c]pyrrole-1-carboxylate (*endo*-3*i*).**

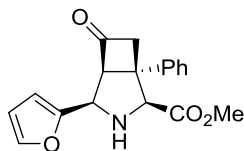

Following the typical procedure, the reaction of 3-phenylcyclobutenone **2a** (14.4mg, 0.1 mmol) and **1i** (33.4 mg, 0.2 mmol) afforded, after purification by silica gel flash chromatography (cyclohexane/EtOAc 6:1), the cycloadduct *endo*-**3i** (24.9 mg, 80%, yellow oil).

**$[\alpha]_{\text{D}}^{20}$**  : +18.1 ( $c=0.22$ ,  $\text{CHCl}_3$ ), 88% *ee*.

**HPLC:** The enantiomeric excess was determined by HPLC using a Daicel Chiralpak IB column, *n*-hexane/isopropanol 95:5, flow rate 0.7 mL/min ( $\lambda = 210.8$  nm):  $t_{\text{R}} = 44.2$  min (1*S*, 3*R*, 3*aS*, 5*aR*)-**3i** and 57.8 min (1*R*, 3*S*, 3*aR*, 5*aS*)-**3i**.

**<sup>1</sup>H-NMR** (300 MHz, CDCl<sub>3</sub>): δ 7.43-7.33 (m, 6H), 6.47-6.34 (m, 2H), 4.74 (d, *J* = 7.3 Hz, 1H), 4.13 (s, 1H), 4.00-3.90 (m, 1H), 3.72 (s, 3H), 3.57-3.47 (m, 1H), 3.47-3.38 (m, 1H), 1.71 (bs, 1H).

**<sup>13</sup>C-NMR** (75 MHz, CDCl<sub>3</sub>): δ 204.4, 170.6, 150.3, 142.5, 141.8, 128.8, 127.3, 110.6, 107.8, 71.5, 59.1, 53.2, 52.3, 48.4, 29.8.

**HRMS** (ESI<sup>+</sup>): calcd for C<sub>18</sub>H<sub>18</sub>NO<sub>4</sub>, 312.1236; found, 312.1232 ([M+H], 100).

**(1*S*, 3*R*, 3*aS*, 5*aR*)-Methyl-5*a*-phenyl-3-(thiophen-2-yl)-4(oxo)heptahydrocyclobuta[c]pyrrole-1-carboxylate (*endo*-**3j**).**

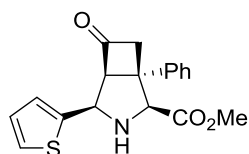

Following the typical procedure, the reaction of 3-phenylcyclobutenone **2a** (14.4mg, 0.1 mmol) and **1j** (36.6 mg, 0.2 mmol) afforded, after purification by silica gel flash chromatography (cyclohexane/EtOAc 6:1), the cycloadduct *endo*-**3j** (24.5 mg, 75%, yellow oil).

[α]<sub>D</sub><sup>20</sup> : +51.0 (c=0.22, CHCl<sub>3</sub>), 80% *ee*.

**SFC**: The enantiomeric excess was determined by SFC using a Chiralpak-IC column [CO<sub>2</sub>/MeOH from 95:5 to 60:40 in 8 min, 2.0 mL/min (λ = 230.4 nm)]: *t*<sub>R</sub> = 4.578 min (1*S*, 3*R*, 3*aS*, 5*aR*)-**3j** and 6.07 min (1*R*, 3*S*, 3*aR*, 5*aS*)-**3j**.

**<sup>1</sup>H-NMR** (300 MHz, CDCl<sub>3</sub>): δ 7.33-7.27 (m, 2H), 7.25-7.17 (m, 2H), 7.16-7.12 (m, 2H), 7.02 (d, *J* = 3.6 Hz, 1H), 6.89 (dd, *J* = 5.0, 3.6 Hz, 1H), 4.85 (d, *J* = 7.2 Hz, 1H), 4.06 (s, 1H), 3.82 (ddd, *J* = 7.1, 3.7, 1.6 Hz, 1H), 3.60 (s, 3H), 3.41 (dd, *J* = 18.6, 1.6 Hz, 1H), 3.32 (dd, *J* = 18.6, 3.7 Hz, 1H), 2.82 (bs, 1H).

**<sup>13</sup>C-NMR** (75 MHz, CDCl<sub>3</sub>): δ 204.8, 170.5, 142.0, 140.2, 128.9, 128.8, 127.4, 127.3, 127.0, 126.0, 125.3, 125.0, 71.4, 61.1, 53.6, 52.2, 48.2, 29.9.

**HRMS** (ESI<sup>+</sup>): calcd for C<sub>18</sub>H<sub>18</sub>NO<sub>3</sub>S, 328.1007; found, 328.0991 ([M+H], 100).

**(1*S*, 3*S*, 3*aS*, 5*aR*)-Methyl-3-cyclohexyl-5*a*-phenyl-4-(oxo)heptahydrocyclobuta[c]pyrrole-1-carboxylate (*endo*-**3k**).**

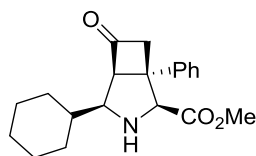

Following the typical procedure, the reaction of 3-phenylcyclobutenone **2a** (14.4mg, 0.1 mmol) and **1k** (36.6 mg, 0.2 mmol) afforded, after purification by silica gel flash chromatography (cyclohexane/EtOAc 6:1), the cycloadduct *endo*-**3k** (20.9 mg, 64%, colorless oil).

[α]<sub>D</sub><sup>20</sup> : +60.1 (c=0.22, CHCl<sub>3</sub>), 72% *ee*.



**HPLC:** The enantiomeric excess was determined by HPLC using a Daicel Chiralpak IA column, *n*-hexane/isopropanol 95:5, flow rate 0.7 mL/min ( $\lambda$  = 210.8 nm):  $t_R$  = 19.7 min (1*R*, 3*R*, 3*aR*, 5*aS*)-**3k** and 21.8 min (1*S*, 3*S*, 3*aS*, 5*aR*)-**3k**.

**<sup>1</sup>H-NMR** (300 MHz, CDCl<sub>3</sub>):  $\delta$  7.42-7.35 (m, 2H), 7.32-7.27 (m, 3H), 4.00 (s, 1H), 3.81 (ddd,  $J$  = 7.3, 3.3, 1.4 Hz, 1H), 3.68 (s, 3H), 3.42-3.34 (m, 1H), 3.30 (dd,  $J$  = 18.6, 1.4 Hz, 1H), 3.20 (dd,  $J$  = 9.9, 7.1 Hz, 1H), 2.33 (bs, 1H), 2.07-1.93 (m, 2H), 1.77-1.63 (m, 3H), 1.39-1.00 (m, 6H).

**<sup>13</sup>C-NMR** (75 MHz, CDCl<sub>3</sub>):  $\delta$  207.0, 171.2, 142.7, 128.7, 127.2, 127.1, 75.2, 71.9, 68.2, 52.9, 52.1, 48.0, 39.8, 31.6, 30.8, 26.4, 25.8, 25.7.

**HRMS** (ESI<sup>+</sup>): calcd for C<sub>20</sub>H<sub>26</sub>NO<sub>3</sub>, 328.1913; found, 328.1907 ([M+H], 100).

**(1*S*, 3*R*, 3*aS*, 5*aR*)-Methyl-5*a*-phenyl-3-(2-bromophenyl)-2-N-(benzyl)-4-(oxo)-heptahydro-cyclobuta[c]pyrrole-1-carboxylate (N-benzyl derivative of *endo*-**3g**).**

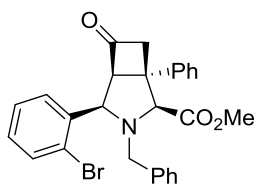

To a solution of *endo*-**3g** (116.1 mg, 0.36 mmol) in THF (15.0 mL) at room temperature, was added successively K<sub>2</sub>CO<sub>3</sub> (80 mg, 0.58 mmol) and benzyl bromide (56  $\mu$ L, 0.47 mmol). The mixture was stirred at 40 °C for 12 h and then was cooled to room temperature.

After that, water was added (10.0 mL) and the aqueous phase was extracted with CH<sub>2</sub>Cl<sub>2</sub> (3 x 8 mL). The resulting organic phase was washed with brine (2 x 8 mL), dried over Na<sub>2</sub>SO<sub>4</sub> and concentrated under reduced pressure. The residue was purified by silica gel flash chromatography (cyclohexane-EtOAc 3:1), to afford the N-benzyl derivative (142.8 mg, 95%, white solid).

**M.p.:** 158-160 °C.

**<sup>1</sup>H-NMR** (300 MHz, CDCl<sub>3</sub>):  $\delta$  7.71 (dd,  $J$  = 7.8, 1.5 Hz, 1H), 7.66-7.60 (m, 1H), 7.46-7.33 (m, 3H), 7.32-7.25 (m, 4H), 7.24-7.15 (m, 3H), 6.98 (dd,  $J$  = 7.0, 2.6 Hz, 1H), 4.45 (d,  $J$  = 7.7 Hz, 1H), 4.05-3.97 (m, 2H), 3.94 (d,  $J$  = 14.4 Hz, 1H), 3.70 (d,  $J$  = 14.4 Hz, 1H), 3.60 (s, 3H), 3.59 (s, 1H), 3.26 (dd,  $J$  = 18.8, 5.3 Hz, 1H).

**<sup>13</sup>C-NMR** (75 MHz, CDCl<sub>3</sub>):  $\delta$  205.0, 170.9, 142.0, 134.8, 133.2, 133.0, 130.5, 130.1, 129.6, 128.8, 128.4, 127.8, 127.7, 127.3, 127.1, 124.1, 74.4, 71.8, 67.2, 53.9, 53.8, 51.9, 46.7.

**HRMS** (ESI<sup>+</sup>): calcd for C<sub>27</sub>H<sub>25</sub>BrNO<sub>3</sub>, 490.1018; found, 490.1442 ([M+H], 100).

**(1*S*, 3*R*, 3*aS*, 5*aR*)-Methyl-3-phenyl-5a-(4-methoxyphenyl)-4-(oxo)heptahydrocyclobuta[c]pyrrole-1-carboxylate (*endo*-**3l**).**

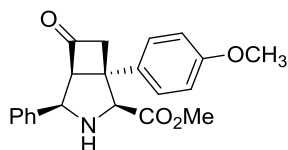

Following the typical procedure, the reaction of 3-(4-methoxyphenyl)cyclobutenone **2b** (17.4 mg, 0.1 mmol) and **1a** (35.4 mg, 0.2 mmol) afforded, after purification by silica gel flash chromatography (cyclohexane/EtOAc 6:1), the cycloadduct *endo*-**3l** (28.1 mg, 80%, white solid).

**M.p.:** 134-136 °C.

**[ $\alpha$ ]<sub>D</sub><sup>20</sup>:** +22.7 (c=0.22, CHCl<sub>3</sub>), 90% *ee*.

**SFC:** The enantiomeric excess was determined by SFC using a Chiralpak-IC column [CO<sub>2</sub>/MeOH from 95:5 to 60:40 in 8 min, 2.0 mL/min ( $\lambda$  = 230.4 nm)]: *t<sub>R</sub>* = 5.1 min (1*S*, 3*R*, 3*aS*, 5*aR*)-**3l** and 6.085 min (1*R*, 3*S*, 3*aR*, 5*aS*)-**3l**.

**<sup>1</sup>H-NMR** (300 MHz, CDCl<sub>3</sub>):  $\delta$  7.45-7.29 (m, 7H), 6.97-6.92 (m, 2H), 4.71 (d, *J* = 7.3 Hz, 1H), 4.17 (s, 1H), 3.90-3.86 (m, 1H), 3.84 (s, 3H), 3.74 (s, 3H), 3.50 (dd, *J* = 18.4, 2.3 Hz, 1H), 3.38 (dd, *J* = 18.4, 4.2 Hz, 1H).

**<sup>13</sup>C-NMR** (75 MHz, CDCl<sub>3</sub>):  $\delta$  205.4, 170.9, 158.6, 137.0, 134.1, 128.5, 128.4, 128.0, 127.0, 114.0, 71.3, 64.8, 55.3, 53.6, 53.4, 52.0, 47.0.

**HRMS** (ESI<sup>+</sup>): calcd for C<sub>21</sub>H<sub>21</sub>NO<sub>4</sub>, 352.1549; found, 352.1538 ([M+H], 100).

**(1*S*, 3*R*, 3*aS*, 5*aR*)-Methyl-3-phenyl-5a-(4-fluorophenyl)-4-(oxo)heptahydrocyclobuta[c]pyrrole-1-carboxylate (*endo*-**3m**).**

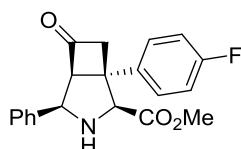

Following the typical procedure, the reaction of 3-(4-fluorophenyl)cyclobutenone **2c** (16.2 mg, 0.1 mmol) and **1a** (35.4 mg, 0.2 mmol) afforded, after purification by silica gel flash chromatography (cyclohexane/EtOAc 6:1), the cycloadduct *endo*-**3m** (24.4 mg, 72%, yellow solid).

**M.p.:** 150-152 °C.

**[ $\alpha$ ]<sub>D</sub><sup>20</sup>:** +12.6 (c=0.22, CHCl<sub>3</sub>), 90% *ee*.

**SFC:** The enantiomeric excess was determined by SFC using a Chiralpak-IC column [CO<sub>2</sub>/MeOH from 95:5 to 60:40 in 8 min, 2.0 mL/min ( $\lambda$  = 210.4 nm)]: *t<sub>R</sub>* = 3.989 min (1*S*, 3*R*, 3*aS*, 5*aR*)-**3m** and 4.917 min (1*R*, 3*S*, 3*aR*, 5*aS*)-**3m**.

**<sup>1</sup>H-NMR** (300 MHz, CDCl<sub>3</sub>):  $\delta$  7.43-7.31 (m, 7H), 7.10 (t, *J* = 8.6 Hz, 2H), 4.71 (d, *J* = 7.3 Hz, 1H), 4.16 (s, 1H), 3.87 (ddd, *J* = 7.3, 4.3, 2.5 Hz, 1H), 3.74 (s, 3H), 3.53 (dd, *J* = 18.4, 2.5 Hz, 1H), 3.38 (dd, *J* = 18.4, 4.3 Hz, 1H).

**<sup>13</sup>C-NMR** (75 MHz, CDCl<sub>3</sub>): δ 205.0, 170.8, 162.0 (d, *J* = 246.6 Hz), 138.1 (d, *J* = 3.3 Hz), 137.0, 129.2 (d, *J* = 8.1 Hz), 128.5, 128.2, 127.1, 115.6 (d, *J* = 21.5 Hz), 76.5, 71.4, 65.0, 53.9, 52.2, 47.1.

**<sup>19</sup>F-NMR** (75 MHz, CDCl<sub>3</sub>): δ -115.4.

**HRMS** (ESI+): calcd for C<sub>20</sub>H<sub>18</sub>FNO<sub>3</sub>, 340.1349; found, 340.1356 ([M+H], 100).

**(1*S*, 3*R*, 3*aS*, 5*aR*)-Methyl-3-phenyl-5*a*-(2-methylphenyl)-4-(oxo)heptahydrocyclobuta[c]pyrrole-1-carboxylate (*endo*-**3n**).**

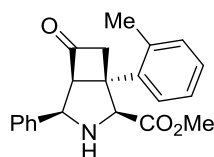

Following the typical procedure, the reaction of 3-(2-methylphenyl)cyclobutenone **2d** (15.8 mg, 0.1 mmol) and **1a** (35.4 mg, 0.2 mmol) afforded, after purification by silica gel flash chromatography (cyclohexane/EtOAc 6:1), the cycloadduct *endo*-**3n** (23.1 mg, 69%, white solid).

**M.p.**: 172-174 °C.

**[α]<sub>D</sub><sup>20</sup>**: +33.0 (c=0.22, CHCl<sub>3</sub>), 92% *ee*.

**SFC**: The enantiomeric excess was determined by SFC using a Chiralpak-IC column [CO<sub>2</sub>/MeOH from 95:5 to 60:40 in 8 min, 2.0 mL/min (λ = 210.4 nm)]: *t<sub>R</sub>* = 4.564 min (1*S*, 3*R*, 3*aS*, 5*aR*)-**3n** and 5.654 min (1*R*, 3*S*, 3*aR*, 5*aS*)-**3n**.

**<sup>1</sup>H-NMR** (300 MHz, CDCl<sub>3</sub>): δ 7.37-7.13 (m, 9H), 4.77 (d, *J* = 7.1 Hz, 1H), 4.10 (s, 1H), 4.06-3.98 (m, 1H), 3.63-3.54 (m, 4H), 3.37 (dd, *J* = 18.4, 4.5 Hz, 1H), 2.31 (s, 3H).

**<sup>13</sup>C-NMR** (75 MHz, CDCl<sub>3</sub>): δ 206.1, 171.4, 139.0, 137.0, 136.0, 132.3, 129.3, 128.5, 128.1, 127.7, 127.1, 126.4, 75.0, 70.0, 64.4, 53.8, 52.1, 49.2, 21.4.

**HRMS** (ESI+): calcd for C<sub>21</sub>H<sub>21</sub>NO<sub>3</sub>, 336.1600; found, 336.1586 ([M+H], 100).

**(1*S*, 3*S*, 3*aS*, 5*aS*)-Methyl-3,3*a*,5*a*-triphenyl-4-(oxo)heptahydrocyclobuta[c]pyrrole-1-carboxylate (*endo*-**3o**).**

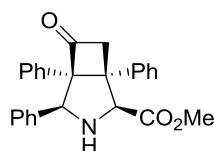

Following the typical procedure, the reaction of 2,3-diphenylcyclobutenone **2e** (22.0 mg, 0.1 mmol) and **1a** (35.4 mg, 0.2 mmol) afforded, after purification by silica gel flash chromatography (cyclohexane/EtOAc 6:1), the cycloadduct *endo*-**3o** (22.3 mg, 64%, white solid).

**M.p.**: 152-154 °C.

**[α]<sub>D</sub><sup>20</sup>**: +30.3 (c=0.22, CHCl<sub>3</sub>), 84% *ee*.

**SFC**: The enantiomeric excess was determined by SFC using a Chiralpak-IC column [CO<sub>2</sub>/MeOH from 95:5 to 60:40 in 8 min, 2.0 mL/min (λ = 210.4 nm)]: *t<sub>R</sub>* = 4.475 min

(1*S*, 3*S*, 3*aS*, 5*aS*)-**3o** and 4.745 min (1*R*, 3*R*, 3*aR*, 5*aR*)-**3o**.

**<sup>1</sup>H-NMR** (300 MHz, Benzene-*d*<sub>6</sub>): δ 7.12-7.06 (m, 3H), 7.04-6.84 (m, 12H), 4.51 (s, 1H), 4.13 (s, 1H), 3.90 (d, *J* = 18.9 Hz, 1H), 3.30 (s, 3H), 3.22 (d, *J* = 18.9 Hz, 1H).

**<sup>13</sup>C-NMR** (75 MHz, CDCl<sub>3</sub>): δ 207.8, 171.2, 139.9, 136.3, 135.8, 128.3, 128.1, 128.0 (bs), 127.9, 127.8, 127.2, 126.9, 126.6, 86.6, 73.3, 65.7, 55.1, 52.8, 52.5.

**HRMS** (ESI<sup>+</sup>): calcd for C<sub>26</sub>H<sub>23</sub>NO<sub>3</sub>, 398.1756; found, 398.1751 ([*M*+*H*], 100).

**(1*S*, 3*R*, 3*aS*, 5*aR*)-Methyl-3, 5*a*-diphenyl-2-*N*-(benzyloxycarbonyl)-4-(oxo)-heptahydrocyclobuta[*c*]pyrrole-1-carboxylate (*endo*-**7**).**

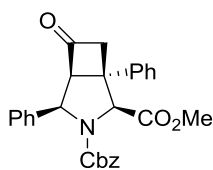

To a solution of *endo*-**3a** (125 mg, 0.39 mmol) in THF (16.0 mL) at room temperature, K<sub>2</sub>CO<sub>3</sub> (95.8 mg, 0.69 mmol) and benzyl chloroformate (66 μL, 0.46 mmol) were successively added. The reaction was stirred at room temperature for 12 hours and the mixture

was quenched with H<sub>2</sub>O (10.0 mL). Then the aqueous phase was extracted with CH<sub>2</sub>Cl<sub>2</sub> (3 x 8 mL) and the resulting organic phase was washed with brine (20 mL), dried over MgSO<sub>4</sub> and concentrated under reduce pressure. The residue was purified by silica gel flash chromatography (CH<sub>2</sub>Cl<sub>2</sub>/TBME (*tert*-butyl methyl ether) 80:1) to afford the compound *endo*-**7** (158 mg, 89%, orange solid).

**M.p.**: 168-170 °C.

**[α]<sub>D</sub><sup>20</sup>**: +41.7 (c=0.22, CHCl<sub>3</sub>), 90 % *ee*.

**SFC**: The enantiomeric excess was determined by SFC using a Chiralpak-IC column [CO<sub>2</sub>/MeOH from 95:5 to 60:40 in 8 min, 2.0 mL/min (λ = 210.4 nm)]: *t<sub>R</sub>* = 4.475 min (1*R*, 3*S*, 3*aR*, 5*aS*)-**7** and 5.682 min (1*S*, 3*R*, 3*aS*, 5*aR*)-**7**.

**<sup>1</sup>H-NMR** (300 MHz, CDCl<sub>3</sub>): δ 7.51 (d, *J* = 7.4 Hz, 2H), 7.46 – 7.27 (m, 9H), 7.21 – 7.13 (m, 2H), 6.93-6.84 (m, 2H), 5.44 (d, *J* = 10.5 Hz, 1H), 4.96 (s, 2H), 4.83 (s, 1H), 4.27 (ddd, *J* = 10.5, 5.2, 2.4 Hz, 1H), 3.75 (s, 3H), 3.60 (dd, *J* = 18.1, 2.4 Hz, 1H), 3.27 (dd, *J* = 18.1, 5.2 Hz, 1H).

**<sup>13</sup>C-NMR** (75 MHz, CDCl<sub>3</sub>): δ 200.6, 170.9, 155.1, 142.6, 138.2, 135.7, 129.2, 128.7, 128.4, 128.0, 127.8, 127.7, 127.6, 126.3, 126.2, 75.0, 72.2, 67.8, 65.6, 55.3, 52.6, 48.2.

**HRMS** (ESI<sup>+</sup>): calcd for C<sub>28</sub>H<sub>26</sub>NO<sub>5</sub>, 456.1811; found, 456.1808 ([*M*+*H*], 100).

**5-Benzyl 4-methyl (3*aR*, 4*S*, 6*S*, 6*aS*)-2-oxo-3*a*,6-diphenylhexahydro-5*H*-furo[2,3-*c*]pyrrole-4,5-dicarboxylate (*endo*-8).**

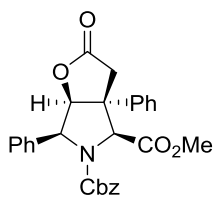

To a solution of *endo*-7 (80.0 mg, 0.18 mmol) in CH<sub>2</sub>Cl<sub>2</sub> (5.0 mL) at 0 °C *m*-chloroperbenzoic acid ( $\leq 77$  % purity, 151.9 mg, 0.88 mmol) was added. The mixture was stirred at room temperature for 24 h and CH<sub>2</sub>Cl<sub>2</sub> (5.0 mL) and a solution of saturated Na<sub>2</sub>SO<sub>3</sub> (5.0 mL) were added. The organic phase was sequentially washed with a saturated solution of NaHCO<sub>3</sub> (5 x 10 mL), H<sub>2</sub>O (2 x 10 mL) and brine (2 x 10 mL), dried over MgSO<sub>4</sub> and concentrated under reduced pressure. The residue was purified by silica gel flash chromatography (cyclohexane-EtOAc 4:1), to afford the lactone *endo*-8 (59.7 mg, 72 %, white solid).

**M.p.:** 178-180 °C.

**[ $\alpha$ ]<sub>D</sub><sup>20</sup>:** + 22.4 (c=0.22, CHCl<sub>3</sub>), 90 % *ee*.

**SFC:** The enantiomeric excess was determined by SFC using a Chiralpak-ID column [CO<sub>2</sub>/MeOH from 95:5 to 60:40 in 8 min, 2.0 mL/min ( $\lambda$  = 210.4 nm)]: *t*<sub>R</sub> = 5.390 min (3*aS*, 4*R*, 6*R*, 6*aR*)-8 and 5.615 min (3*aR*, 4*S*, 6*S*, 6*aS*)-8.

**<sup>1</sup>H-NMR** (300 MHz, CDCl<sub>3</sub>):  $\delta$  7.65–7.57 (m, 2H), 7.49–7.29 (m, 10H), 7.25–7.18 (m, 3H), 5.46 (d, *J* = 5.9 Hz, 1H), 5.26 (d, *J* = 5.9 Hz, 1H), 5.01 (d, *J* = 10.4 Hz, 2H), 4.97 (s, 1H), 3.86 (s, 3H), 3.18 (d, *J* = 18.0 Hz, 1H), 2.90 (d, *J* = 18.0 Hz, 1H).

**<sup>13</sup>C-NMR** (75 MHz, CDCl<sub>3</sub>):  $\delta$  172.5, 170.5, 141.0, 135.7, 135.6, 129.8, 128.5, 128.4, 128.3, 128.1, 128.0, 127.8, 127.5, 125.3, 88.1, 70.0, 67.9, 66.0, 56.3, 53.0, 39.1.

**HRMS** (ESI<sup>+</sup>): calcd for C<sub>28</sub>H<sub>26</sub>NO<sub>6</sub>, 472.1760; found, 472.1774 ([M+H], 100).

**IR** (KBr, cm<sup>-1</sup>): 1708, 1755, 1794.

**(1*S*, 3*R*, 3*aS*, 4*S*, 5*aR*)-4-hydroxy-1-hydroxymethyl-3, 5*a*-diphenyl-2-*N*-(benzyloxycarbonyl)-heptahydrocyclobuta[*c*]pyrrole (*endo*-9).**

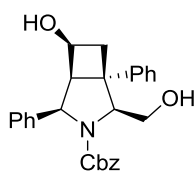

To a solution of *endo*-7 (134.4 mg, 0.295 mmol) in THF (1.5 mL) a 1 M solution of lithium aluminum hydride in THF (0.885 mL, 0.885 mmol) was added dropwise at -78 °C. The mixture was stirred at -78 °C for 4 h and then warmed to room temperature and stirred for 12 hours until completion. Ethyl acetate (3.5 mL) was added, the mixture was stirred for one hour and a saturated solution of aqueous ammonium chloride (5 mL) was added. The organic phase was separated, washed with water (10 mL) and brine (10 mL), dried with MgSO<sub>4</sub>, filtered and evaporated at reduced pressure. After purification by flash chromatography (cyclohexane/EtOAc 3:1) diol *endo*-9 was obtained as white solid (112.7 mg, 89%).

**M.p.:** 172-174 °C.

$[\alpha]_D^{20}$  : + 36.5 (c=0.22, CHCl<sub>3</sub>), 90 % *ee*.

**SFC:** The enantiomeric excess was determined by SFC using a Chiralpak-IC column [CO<sub>2</sub>/MeOH from 95:5 to 60:40 in 8 min, 2.0 mL/min ( $\lambda$  = 210.4 nm)]: *t<sub>R</sub>*= 6.484 min (1*S*, 3*R*, 3*aS*, 4*S*, 5*aR*)-**9** and 7.726 min (1*R*, 3*S*, 3*aR*, 4*R*, 5*aS*)-**9**.

**<sup>1</sup>H-NMR** (300 MHz, Benzene-*d*<sub>6</sub>):  $\delta$  7.25 (d, *J* = 7.4 Hz, 2H), 7.13-7.04 (m, 5H), 7.02-6.92 (m, 6H), 6.73-6.66 (m, 2H), 5.28 (d, *J* = 10.4 Hz, 1H), 4.93 (d, *J* = 12.6 Hz, 1H), 4.82 (d, *J* = 12.6 Hz, 1H), 4.24 (dd, *J* = 11.7, 6.3 Hz, 1H), 4.13 (dd, *J* = 11.7, 3.0 Hz, 1H), 4.08 (dd, *J* = 6.3, 3.0 Hz, 1H), 3.80 (q, *J* = 7.8 Hz, 1H), 3.08 (ddd, *J* = 10.4, 6.8, 3.9 Hz, 1H), 2.80 (d, *J* = 8.7 Hz, 1H), 2.41 (ddd, *J* = 12.1, 8.0, 3.9 Hz, 1H), 2.29 (dd, *J* = 12.1, 8.0 Hz, 1H).

**<sup>13</sup>C-NMR** (75 MHz, CDCl<sub>3</sub>):  $\delta$  157.9, 143.7, 140.2, 135.7, 129.3, 129.0, 128.4, 128.0, 127.9, 127.5, 127.1, 126.3, 126.2, 73.6, 68.0, 65.3, 65.2, 63.9, 55.5, 50.4, 37.2.

**HRMS** (ESI<sup>+</sup>): calcd for C<sub>27</sub>H<sub>25</sub>NO<sub>4</sub>, 430.2018 and 452.1838; found, 430.2012 ([M+H], 17), 452.1812 ([M+Na], 100).

**(1*S*, 3*R*, 3*aS*, 4*S*, 5*aR*)-Methyl-3, 5*a*-diphenyl-2-*N*-(benzyloxycarbonyl)-4-hydroxy-heptahydrocyclobuta[c]pyrrole-1-carboxylate (*endo*-**10**).**

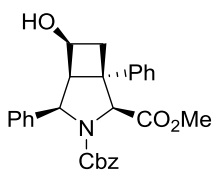

To a solution of *endo*-**7** (150.0 mg, 0.329 mmol) in MeOH (5.0 mL) at room temperature NaBH<sub>4</sub> (18.7 mg, 0.49 mmol) was added and the mixture was stirred for 2 h. Then a saturated solution of NH<sub>4</sub>Cl (5.0 mL) was added and the resulting aqueous phase was extracted with CH<sub>2</sub>Cl<sub>2</sub> (3 x 5 mL). The organic phase was washed successively with a saturated solution of NaHCO<sub>3</sub> (2 x 5 mL), H<sub>2</sub>O (2 x 5 mL) and brine (5.0 mL). The resulting organic solution was dried with MgSO<sub>4</sub> and concentrated under reduced pressure. The residue was purified by silica gel flash chromatography (cyclohexane/EtOAc 1:1), to afford the alcohol *endo*-**10** (98.7 mg, 65%, white solid).

**M.p.:** 154-156 °C.

$[\alpha]_D^{20}$  : + 57.8 (c=0.22, CHCl<sub>3</sub>), 90 % *ee*.

**SFC:** The enantiomeric excess was determined by SFC using a Chiralpak-IA column [CO<sub>2</sub>/MeOH from 95:5 to 60:40 in 8 min, 2.0 mL/min ( $\lambda$  = 210.4 nm)]: *t<sub>R</sub>*= 5.281 min (1*R*, 3*S*, 3*aR*, 4*R*, 5*aS*)-**10** and 6.656 min (1*S*, 3*R*, 3*aS*, 4*S*, 5*aR*)-**10**.

**<sup>1</sup>H-NMR** (300 MHz, C<sub>6</sub>D<sub>6</sub>):  $\delta$  7.85 (d, *J*=7.5 Hz, 2H), 7.53-7.22 (m, 11H), 7.10-6.93 (m, 2H), 5.75 (d, *J* = 10.3 Hz, 1H), 5.07 (s, 2H), 4.56 (s, 1H), 4.10-3.95 (m, 1H), 3.92 – 3.82

(m, 1H), 3.79 (s, 3H), 2.87–2.65 (m, 2H), 1.16 (d,  $J = 11.4$  Hz, 1H).

**$^{13}\text{C}$ -NMR** (75 MHz,  $\text{CDCl}_3$ ):  $\delta$  171.1, 155.1, 143.0, 139.7, 136.0, 129.2, 128.9, 128.4, 128.0, 127.9, 127.5, 127.3, 126.9, 126.3, 72.1, 67.6, 65.2, 64.6, 56.9, 52.3, 50.3, 39.2.

**HRMS** (ESI<sup>+</sup>): calcd for  $\text{C}_{28}\text{H}_{28}\text{NO}_5$ , 458.1967; found, 458.1922 ( $[\text{M}+\text{H}]$ , 100).

**(1*R*, 3*S*, 6*S*, 8*R*, 9*S*)-Benzyl-5-oxo-1,8-diphenyl-4-oxa-7-azatricycle[4.3.0.0<sup>3,9</sup>]-nonane-7-carboxylate (*endo*-11).**

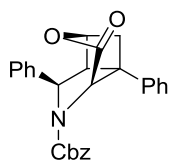

To a solution of  $\text{PPh}_3\text{AuCl}$  (3.25 mg, 0.0066 mmol) and  $\text{AgOTf}$  (1.69 mg, 0.0066 mmol) in toluene (1.0 mL) at room temperature a suspension of alcohol *endo*-10 (30.0 mg, 0.066 mmol) in toluene (1.5 mL) was added. Then, the mixture was stirred at 110 °C for 30 minutes and  $\text{Et}_3\text{N}$  (0.1 mL),  $\text{AcOEt}$  (5.0 mL) and  $\text{H}_2\text{O}$  (5.0 mL) were successively added. The aqueous phase was extracted with  $\text{CH}_2\text{Cl}_2$  (3 x 3 mL) and the resulting organic phase was washed with  $\text{H}_2\text{O}$  (2 x 5 mL) and brine (2 x 5 mL), dried over  $\text{MgSO}_4$  and concentrated under reduced pressure. The residue was purified by silica gel flash chromatography (cyclohexane/ $\text{EtOAc}$  4:1), to afford the lactone **11** (27.8 mg, 99%, white solid).

**M.p.:** 148–150 °C.

**$[\alpha]_{\text{D}}^{20}$ :** + 48.2 ( $c=0.22$ ,  $\text{CHCl}_3$ ), 90 % *ee*.

**SFC:** The enantiomeric excess was determined by SFC using a Chiralpak-IC column [ $\text{CO}_2/\text{MeOH}$  from 95:5 to 60:40 in 8 min, 2.0 mL/min ( $\lambda = 240.4$  nm)]:  $t_{\text{R}} = 5.315$  min (1*R*, 3*S*, 6*S*, 8*R*, 9*S*)-**11** and 6.424 min (1*S*, 3*R*, 6*R*, 8*S*, 9*R*)-**11**

**$^1\text{H}$ -NMR, COSY** (300 MHz,  $\text{CDCl}_3$ , 1:0.63 mixture of rotamers. The asterisk \* denotes

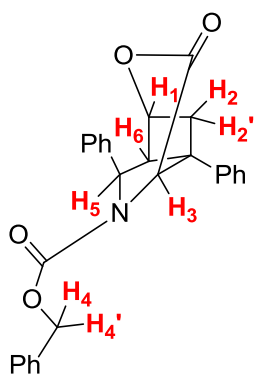

the signal of the minor rotamer):  $\delta$  7.40–7.13 (m, 15 H), 5.63 (d,  $J=6.5$  Hz, 1H,  $\text{H}_5$ ), 5.51\* (d,  $J=6.3$  Hz, 1H,  $\text{H}_5$ ), 5.42\* (d,  $J=1.5$  Hz, 1H,  $\text{H}_3$ ), 5.30 (d,  $J=1.4$  Hz, 1H,  $\text{H}_3$ ), 5.29\* (d,  $J=12.5$  Hz, 2H,  $\text{H}_4/\text{H}_4'$ ), 5.09 (d,  $J=12.5$  Hz, 2H,  $\text{H}_4/\text{H}_4'$ ), 4.72 (t,  $J=4.1$  Hz, 1H,  $\text{H}_1$ ), 4.69\* (t,  $J=4.2$  Hz, 1H,  $\text{H}_1$ ), 3.68 (m, 1H,  $\text{H}_6$ ), 3.61\* (m, 1H,  $\text{H}_6$ ), 2.59 (dd,  $J=12.0, 4.2$  Hz,  $\text{H}_2/\text{H}_2'$ ), 2.40 (dd,  $J=11.9, 4.7$  Hz, 1H,  $\text{H}_2/\text{H}_2'$ ).

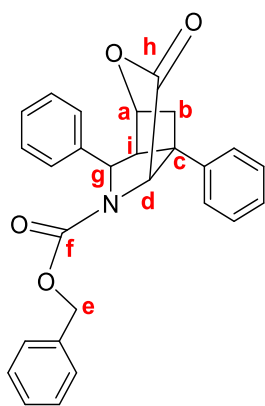

**$^{13}\text{C}$ -NMR, DEPT-135, HMQC, HMBC** (75 MHz,  $\text{CDCl}_3$ , 1:0.63 mixture of rotamers. The asterisk \* denotes the signal of the minor rotamer):<sup>3</sup>  $\delta$  166.8 (1C,  $\text{C}_\text{h}$ ), 154.3 (1C,  $\text{C}_\text{f}$ ), 154.1\* (1C,  $\text{C}_\text{f}$ ), 139.3 (1C,  $\text{CH}_\text{ar}$ ), 139.1\* (1C,  $\text{CH}_\text{ar}$ ), 137.0\* (1C,  $\text{CH}_\text{ar}$ ), 136.2 (1C,  $\text{CH}_\text{ar}$ ), 135.8 (1C,  $\text{CH}_\text{ar}$ ), 135.7\* (1C,  $\text{CH}_\text{ar}$ ), 129.2 (3C, CH,  $\text{CH}_\text{ar}$ ), 128.7 ( $\text{CH}_\text{ar}$ ), 128.6\* ( $\text{CH}_\text{ar}$ ), 128.5 (2C,  $\text{CH}_\text{ar}$ ), 128.3\* ( $\text{CH}_\text{ar}$ ), 127.9\* ( $\text{CH}_\text{ar}$ ), 127.6\*, 127.5\* (2C, CH,  $\text{CH}_\text{ar}$ ), 127.3 (2C, CH,  $\text{CH}_\text{ar}$ ), 125.3\* ( $\text{CH}_\text{ar}$ ), 125.24\* ( $\text{CH}_\text{ar}$ ), 125.3 (2C, CH,  $\text{CH}_\text{ar}$ ), 125.0\* (2C, CH,  $\text{CH}_\text{ar}$ ), 75.74\* (1C, CH,  $\text{C}_\text{a}$ ), 75.7 (1C, CH,  $\text{C}_\text{a}$ ), 69.45 (1C, CH,  $\text{C}_\text{d}$ ), 68.9\* (1C, CH,  $\text{C}_\text{d}$ ), 67.7 (1C,  $\text{CH}_2$ ,  $\text{C}_\text{e}$ ), 67.6\* (1C,  $\text{CH}_2$ ,  $\text{C}_\text{e}$ ), 62.3\* (1C, CH,  $\text{C}_\text{g}$ ), 62.2 (1C, CH,  $\text{C}_\text{g}$ ), 60.3 (1C, CH,  $\text{C}_\text{i}$ ), 56.5\* (1C, CH,  $\text{C}_\text{i}$ ), 55.1 (1C,  $\text{C}_\text{c}$ ), 54.5\* (1C,  $\text{C}_\text{c}$ ), 36.3 (1C,  $\text{CH}_2$ ,  $\text{C}_\text{b}$ ), 36.4\* (1C,  $\text{CH}_2$ ,  $\text{C}_\text{b}$ ).

**HRMS** (ESI<sup>+</sup>): calcd for  $\text{C}_{27}\text{H}_{24}\text{NO}_4$ , 426.1705; found, 426.1532 ( $[\text{M}+\text{H}]$ , 100).

### 3. Preparation of racemic products for HPLC analysis.

The racemic pyrrolidines were prepared according to the general procedure, but using (±)-Binap as ligand. The samples for HPLC analysis were dissolved in isopropyl alcohol for the determination of enantiomeric excess in the case of HPLC and dichloromethane for SFC, and used as quickly as possible to minimize the formation of decomposition products.

### 4. Regiochemical and stereochemical assignment

The relative and absolute configuration of *endo*-**3g** was unequivocally established by X-ray crystal structure analysis of its N-benzyl derivative.

CCDC 1828413 contains the supplementary crystallographic data. These data can be obtained free of charge from the Cambridge Crystallographic Data Center via <https://www.ccdc.cam.ac.uk>

3. Some aromatic carbons could not be assigned from the collected spectroscopic data due to the complexity of the spectrum around 125.0-140.0 ppm. These signals are indicated as  $\text{CH}_\text{ar}$ .



**Figure S1:** X-Ray Structure of the N-benzyl derivative of *endo*-**3g**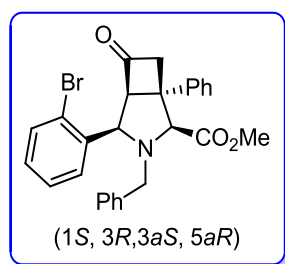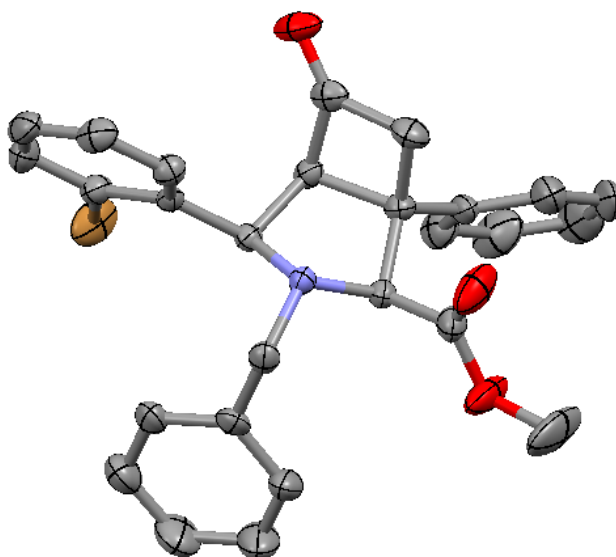**Table S1.** Crystal data of **7** (Hydrogen atoms removed for clarity).

|                               |                              |                     |
|-------------------------------|------------------------------|---------------------|
| <b>Chemical formula</b>       | $C_{27}H_{24}BrNO_3$         |                     |
| <b>Formula weight</b>         | 490.38 g/mol                 |                     |
| <b>Temperature</b>            | 200(2) K                     |                     |
| <b>Wavelength</b>             | 0.71073 Å                    |                     |
| <b>Crystal size</b>           | 0.076 x 0.191 x 0.427 mm     |                     |
| <b>Crystal habit</b>          | clear colourless prismatic   |                     |
| <b>Crystal system</b>         | orthorhombic                 |                     |
| <b>Space group</b>            | P 21 21 21                   |                     |
| <b>Unit cell dimensions</b>   | $a = 7.3574(3)$ Å            | $\alpha = 90^\circ$ |
|                               | $b = 17.3491(9)$ Å           | $\beta = 90^\circ$  |
|                               | $c = 18.2869(9)$ Å           | $\gamma = 90^\circ$ |
| <b>Volume</b>                 | $2334.22(19)$ Å <sup>3</sup> |                     |
| <b>Z</b>                      | 4                            |                     |
| <b>Density (calculated)</b>   | 1.395 g/cm <sup>3</sup>      |                     |
| <b>Absorption coefficient</b> | 1.789 mm <sup>-1</sup>       |                     |
| <b>F(000)</b>                 | 1008                         |                     |

**Table S2.** Data collection and structure refinement

|                                            |                                                                                                                                                               |
|--------------------------------------------|---------------------------------------------------------------------------------------------------------------------------------------------------------------|
| <b>Diffractometer</b>                      | Bruker APEX-II CCD                                                                                                                                            |
| <b>Theta range for data collection</b>     | 2.23 to 25.35°                                                                                                                                                |
| <b>Index ranges</b>                        | -7≤h≤8, -20≤k≤20, -22≤l≤2                                                                                                                                     |
| <b>Reflections collected</b>               | 21048                                                                                                                                                         |
| <b>Independent reflections</b>             | 4274 [R(int) = 0.0597]                                                                                                                                        |
| <b>Coverage of independent reflections</b> | 100.0%                                                                                                                                                        |
| <b>Absorption correction</b>               | multi-scan                                                                                                                                                    |
| <b>Max. and min. transmission</b>          | 0.8760 and 0.5150                                                                                                                                             |
| <b>Structure solution technique</b>        | direct methods                                                                                                                                                |
| <b>Structure solution program</b>          | SHELXS-97 (Sheldrick 2008)                                                                                                                                    |
| <b>Refinement method</b>                   | Full-matrix least-squares on F <sup>2</sup>                                                                                                                   |
| <b>Refinement program</b>                  | SHELXL-2014/7 (Sheldrick, 2014)                                                                                                                               |
| <b>Function minimized</b>                  | $\Sigma w(F_o^2 - F_c^2)^2$                                                                                                                                   |
| <b>Data / restraints / parameters</b>      | 4274 / 0 / 290                                                                                                                                                |
| <b>Goodness-of-fit on F<sup>2</sup></b>    | 1.012                                                                                                                                                         |
| <b>Final R indices</b>                     | 3399 data; R1 = 0.0361,<br>I>2σ(I) wR2 = 0.0684<br><br>all data R1 = 0.0561,<br>wR2 = 0.0746                                                                  |
| <b>Weighting scheme</b>                    | w=1/[σ <sup>2</sup> (F <sub>o</sub> <sup>2</sup> )+(0.0313P) <sup>2</sup> +0.3686P]<br>where P=(F <sub>o</sub> <sup>2</sup> +2F <sub>c</sub> <sup>2</sup> )/3 |
| <b>Absolute structure parameter</b>        | -0.0(0)                                                                                                                                                       |
| <b>Largest diff. peak and hole</b>         | 0.294 and -0.349 eÅ <sup>-3</sup>                                                                                                                             |
| <b>R.M.S. deviation from mean</b>          | 0.051 eÅ <sup>-3</sup>                                                                                                                                        |

## 5. HPLC charts.

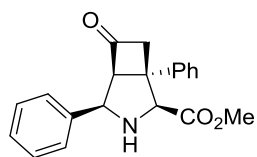*endo-3a*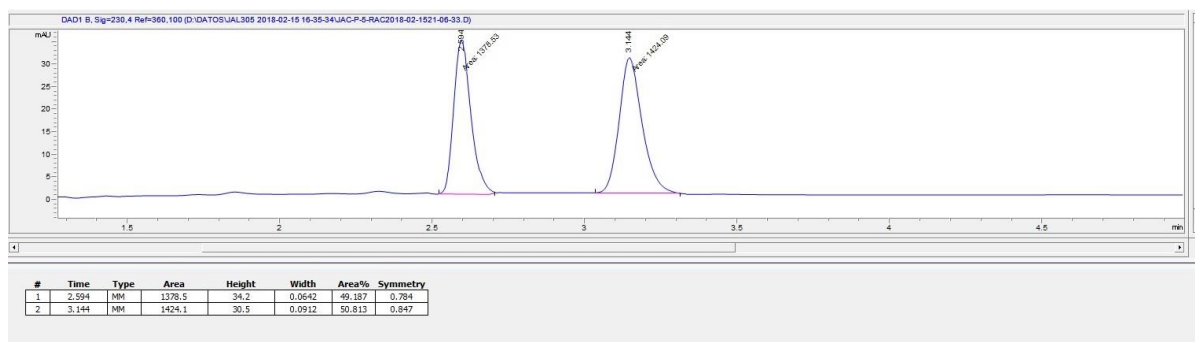Figure S2: (±)-*endo-3a*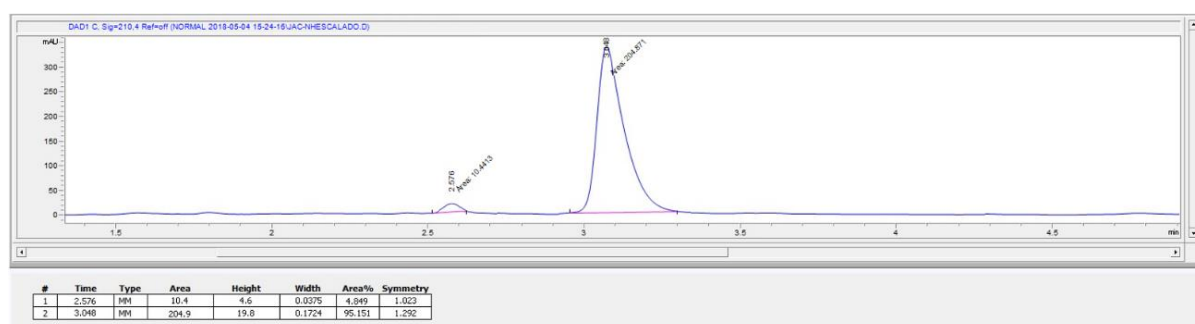Figure S3: (+)-*endo-3a*; 90% *ee*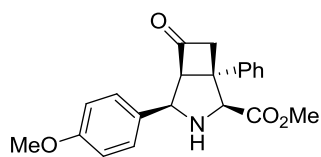*endo-3b*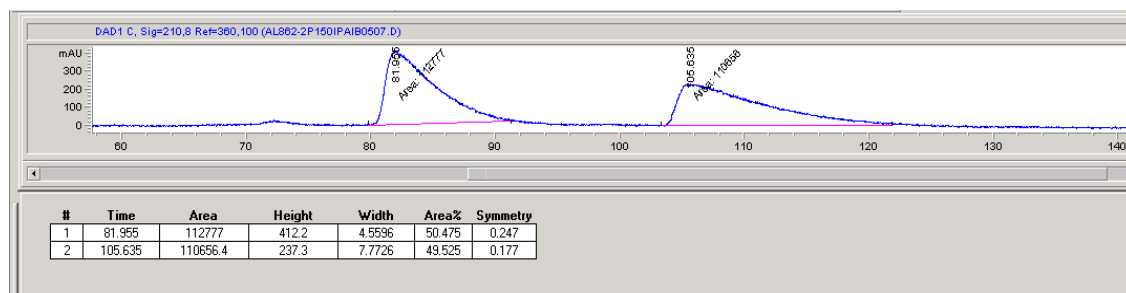Figure S4: (±)-*endo-3b*

S20

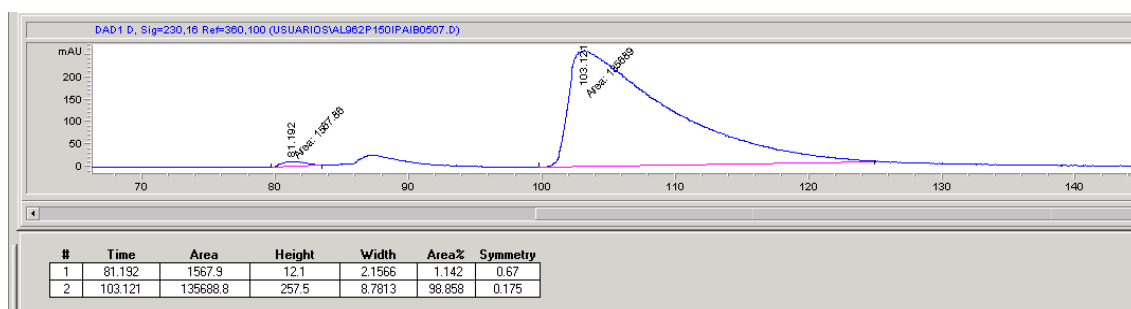

Figure S5: (+)-endo-3b; 98% ee

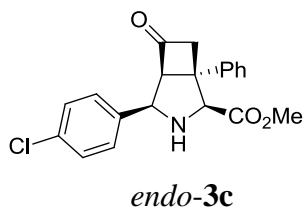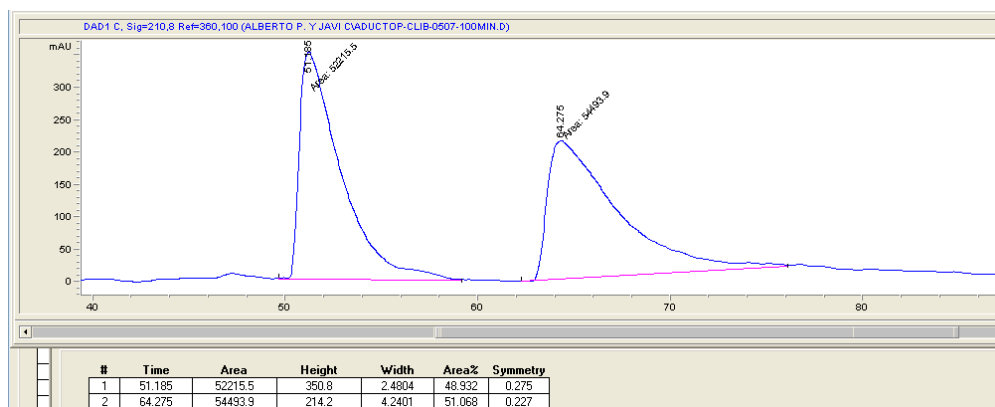

Figure S6: (±)-endo-3c

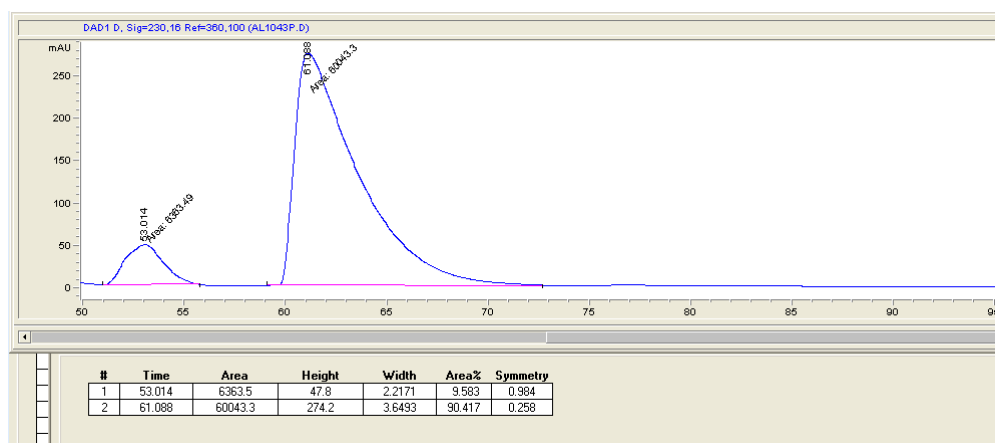

Figure S7: (+)-endo-3c; 81% ee

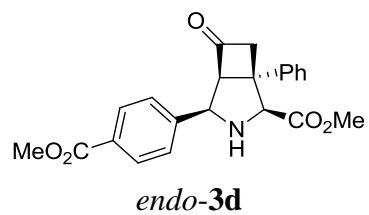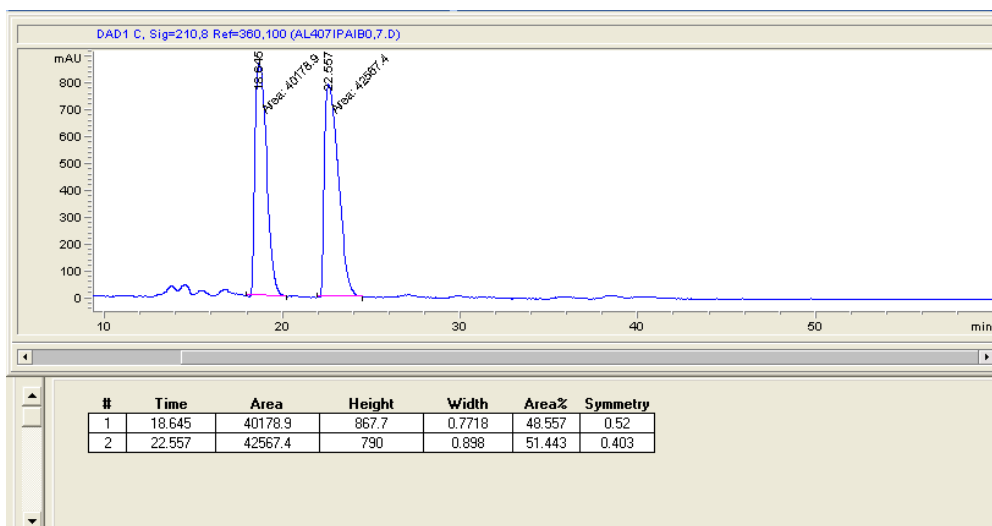

**Figure S8: (±)-*endo*-3d**

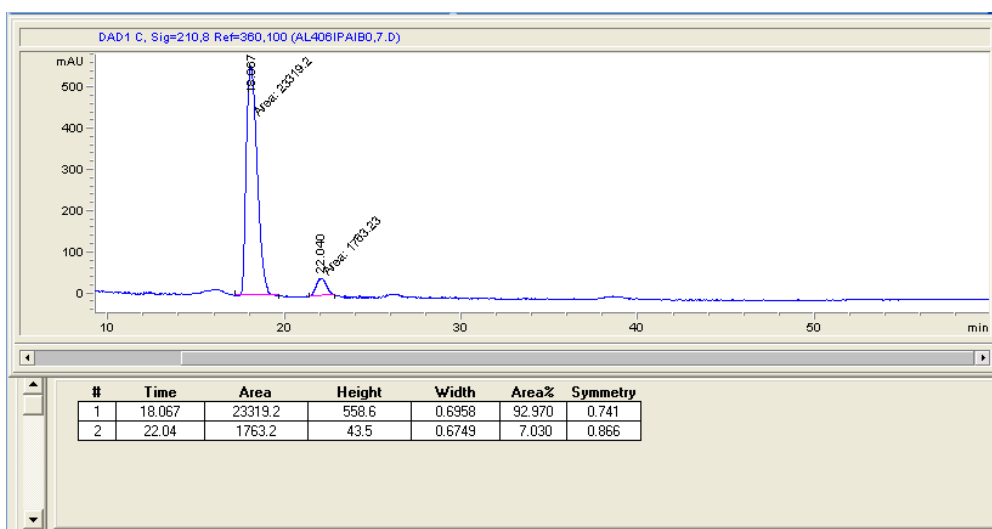

**Figure S9: (+)-*endo*-3d; 85% *ee***

S22

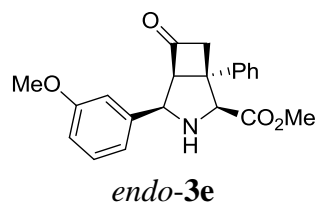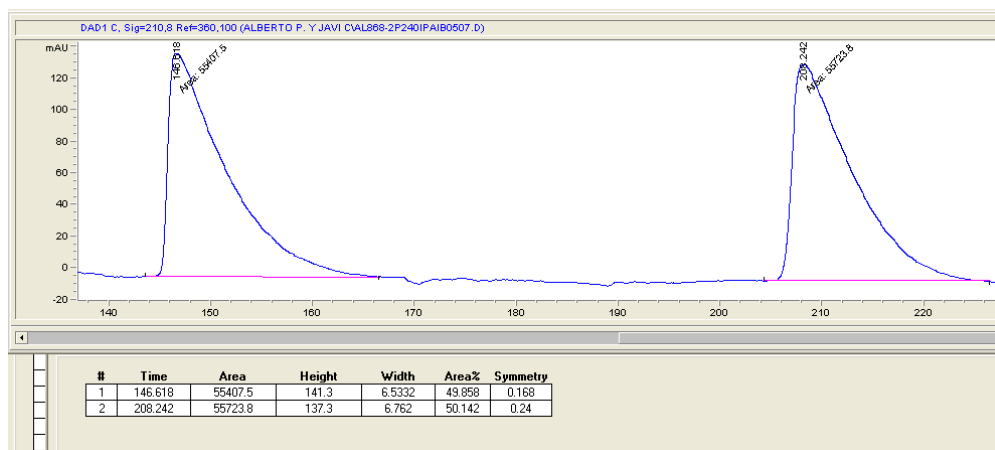

Figure S10: ( $\pm$ )-*endo-3e*

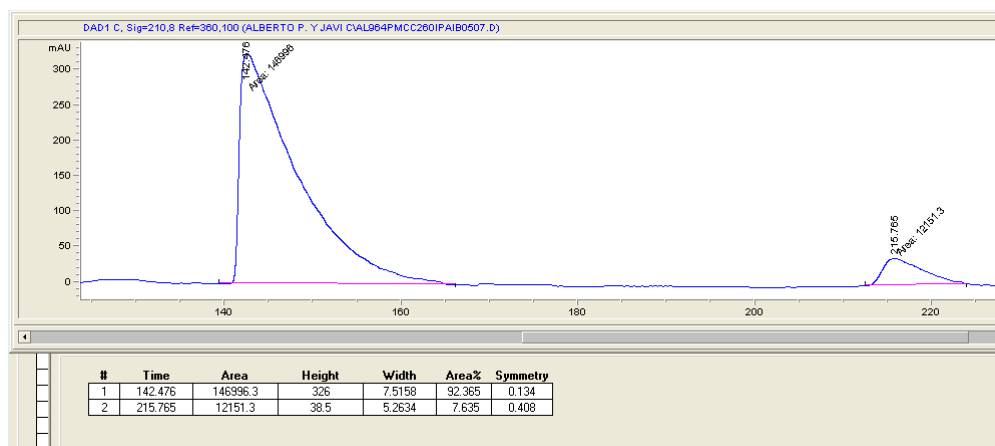

Figure S11: (+)-*endo-3e*; 85% *ee*

S23

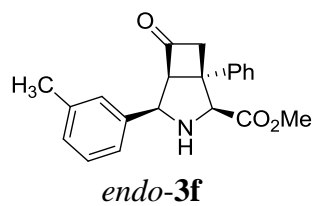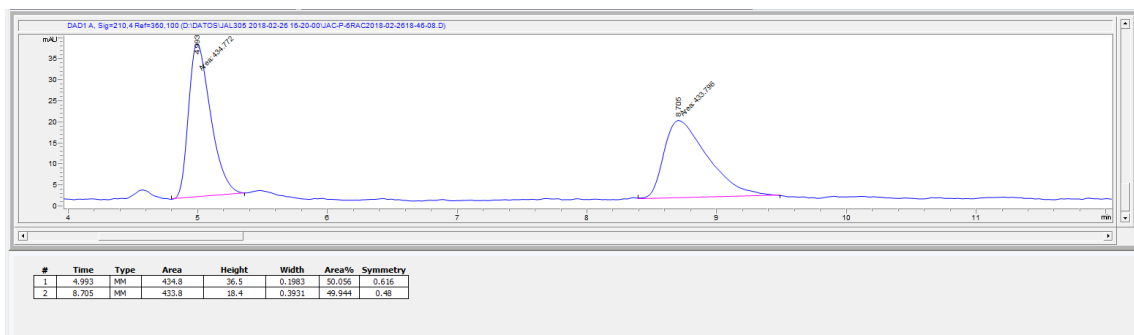

Figure S12: ( $\pm$ )-*endo*-**3f**

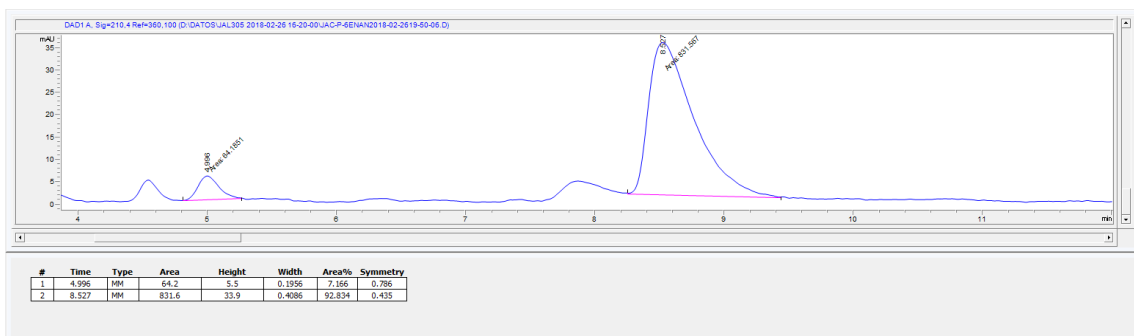

Figure S13: (+)-*endo*-**3f**; 86% *ee*

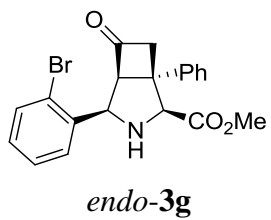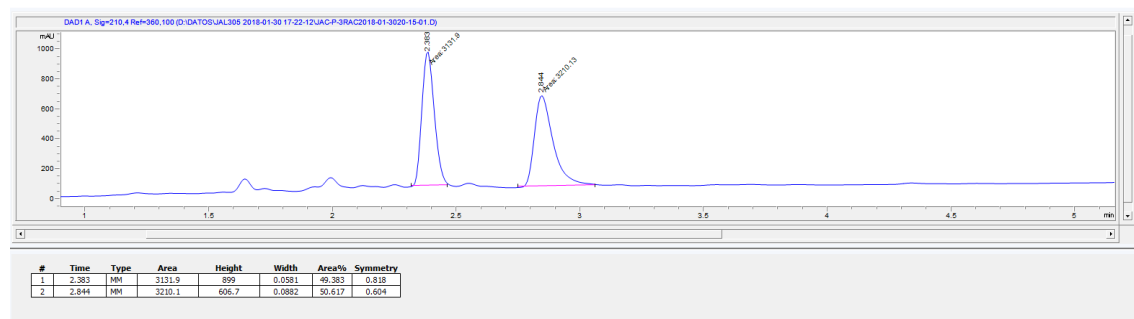

Figure S14: ( $\pm$ )-*endo*-**3g**

S24

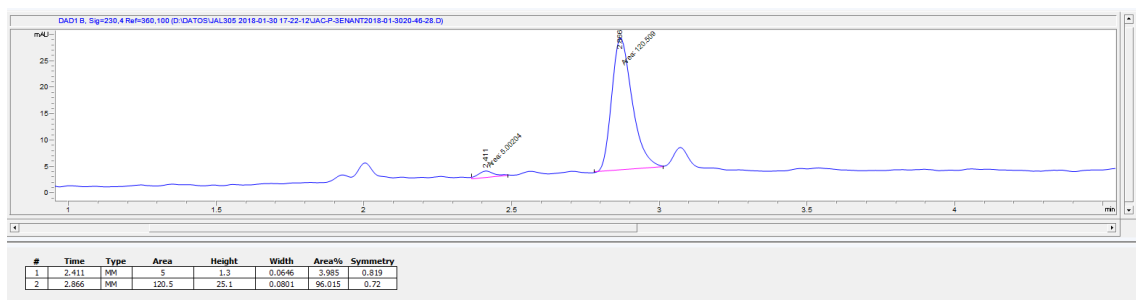

**Figure S15: (+)-endo-3g; 92% ee**

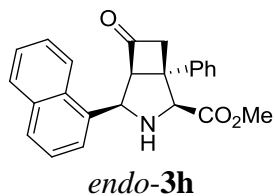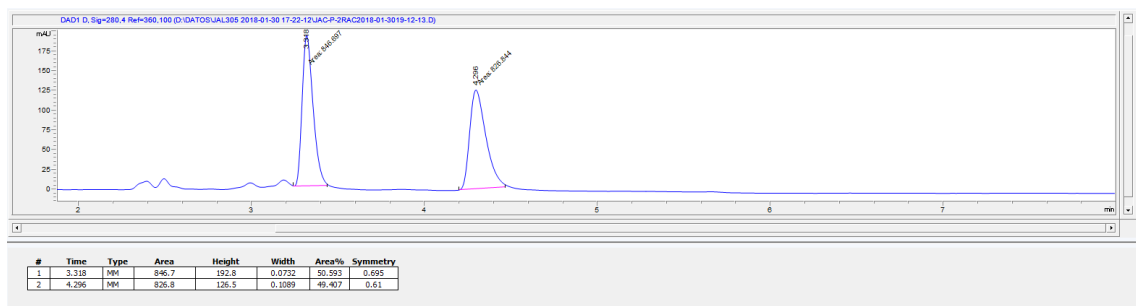

**Figure S16: (±)-endo-3h**

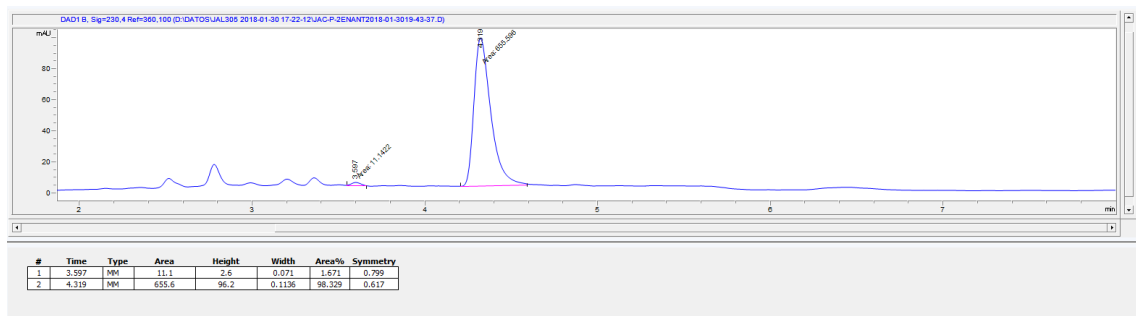

**Figure S17: (+)-endo-3h; 97% ee**



S25

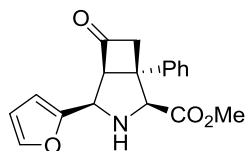

*endo*-**3i**

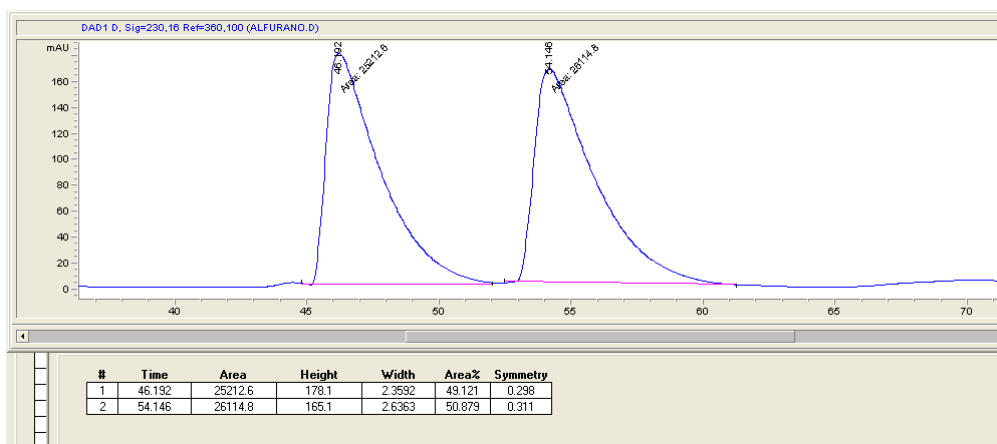

**Figure S18:** (±)-*endo*-**3i**

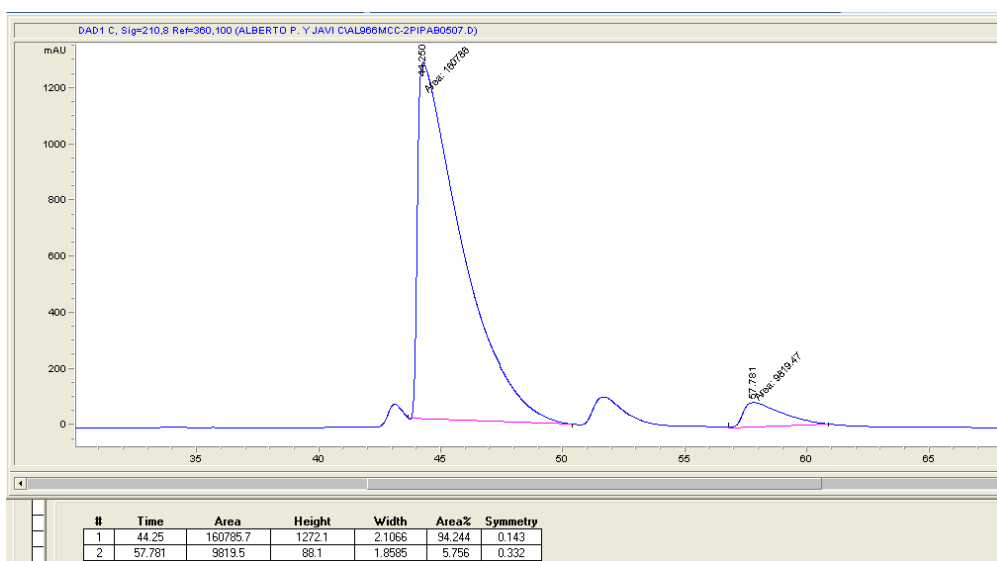

**Figure S19:** (+)-*endo*-**3i**; 88% *ee*

S26

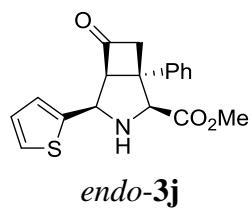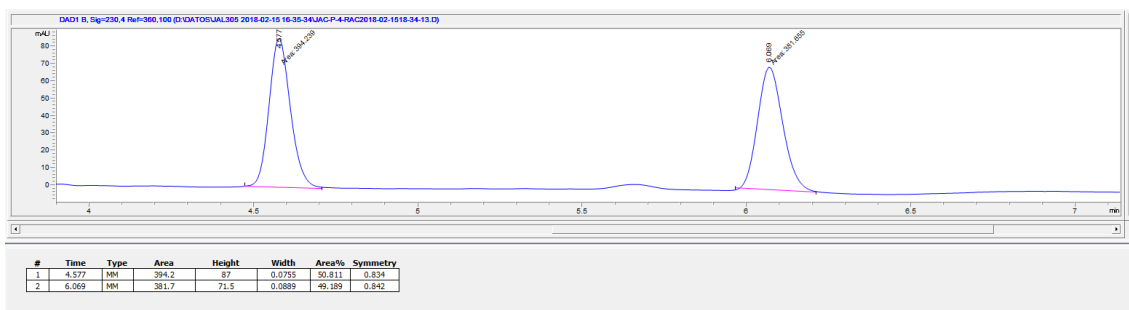

Figure S20: (±)-*endo-3j*

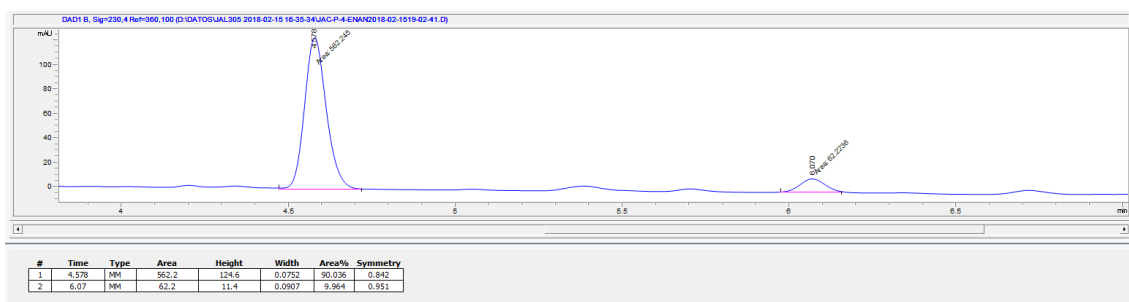

Figure S21: (+)-*endo-3j*; 80% *ee*

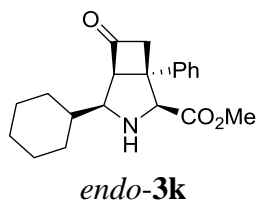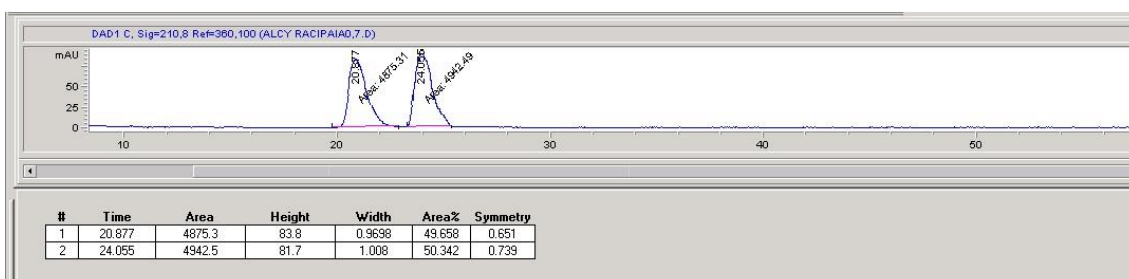

Figure S22: (±)-*endo-3k*

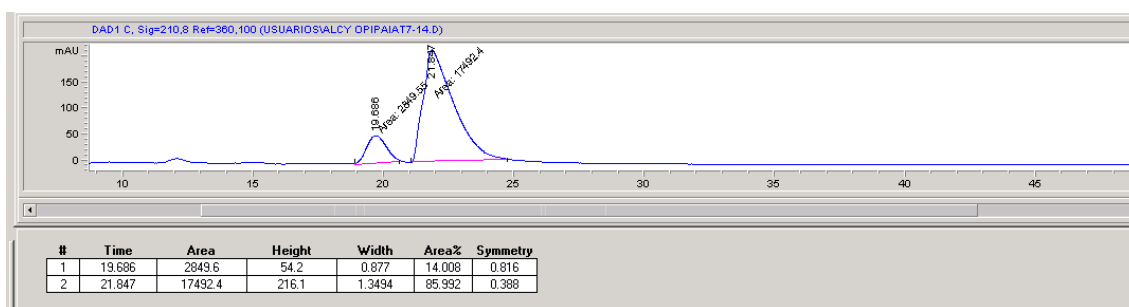

Figure S23: (+)-endo-3k; 72% ee

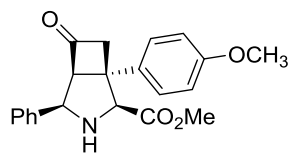

endo-3l

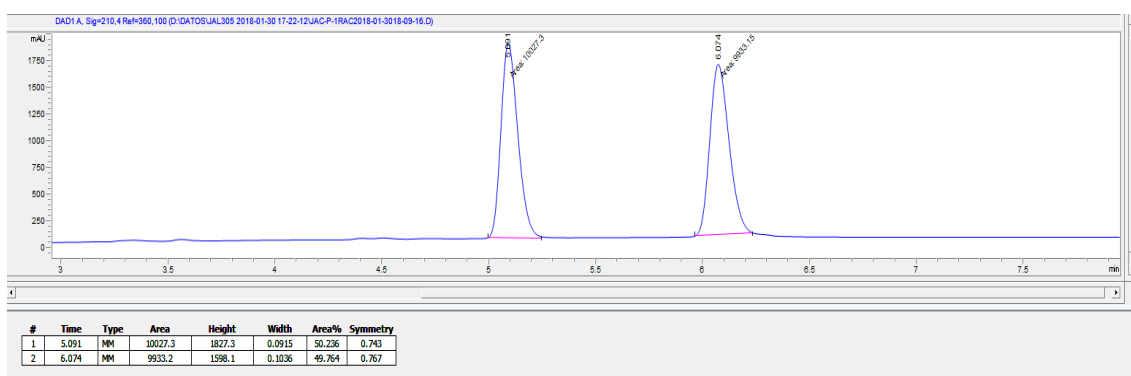

Figure S24: (±)-endo-3l

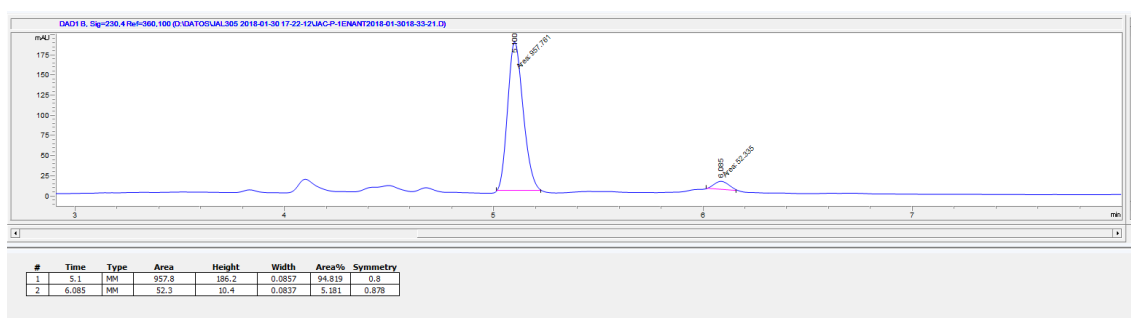

Figure S25: (+)-endo-3l; 90% ee

S28

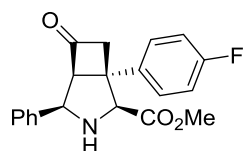

*endo*-3m

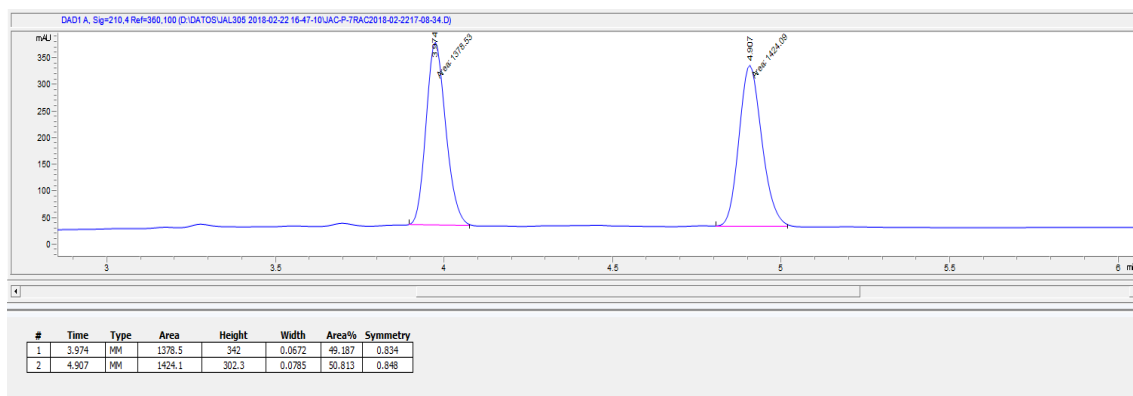

**Figure S26: (±)-*endo*-3m**

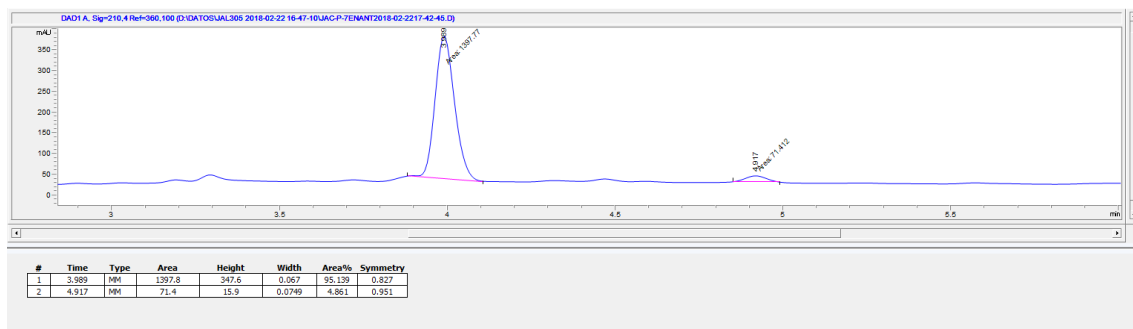

**Figure S27: (+)-*endo*-3m; 90% *ee***

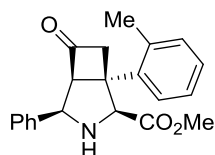

*endo*-3n

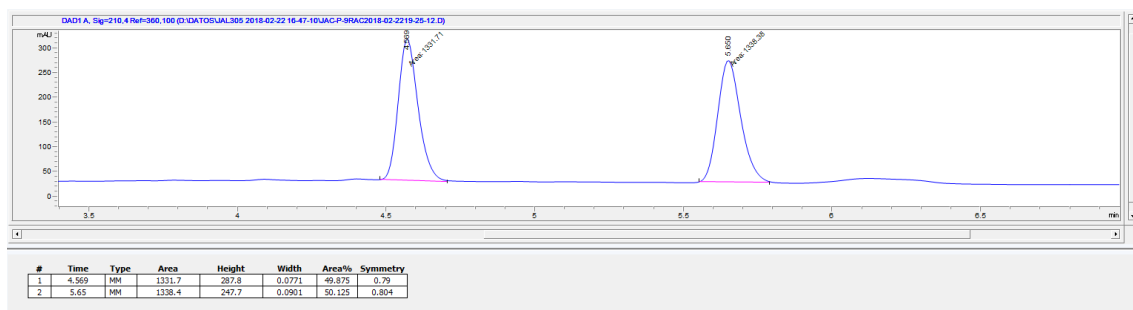

**Figure S28: (±)-*endo*-3n**

S29

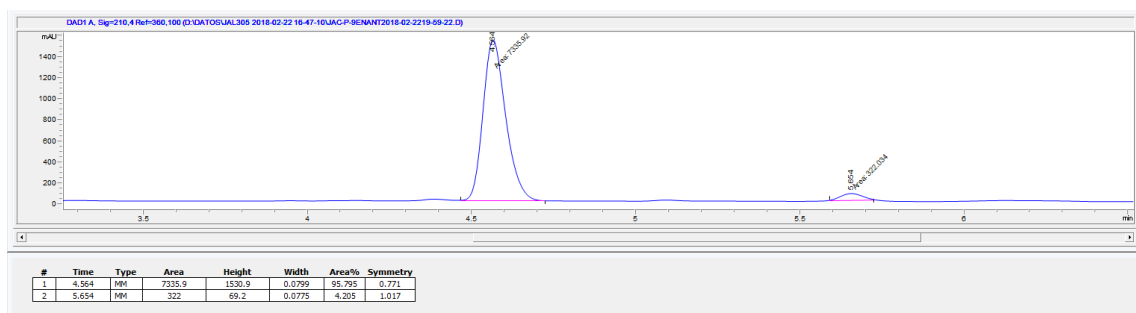

Figure S29: (+)-endo-3n; 92% ee

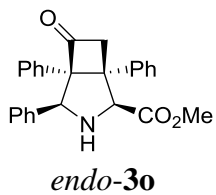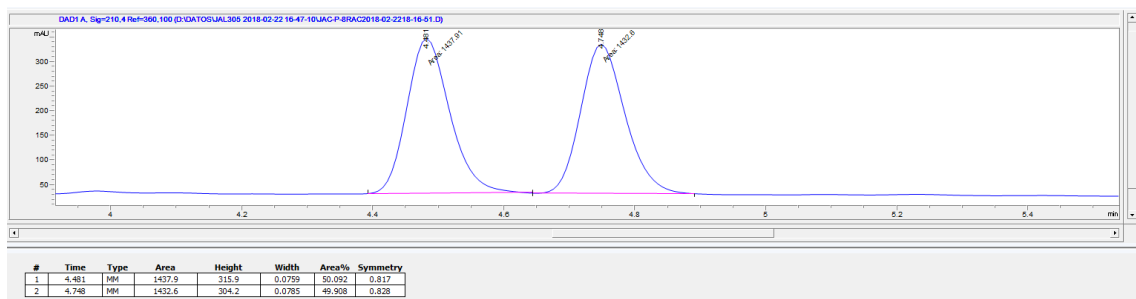

Figure S30: (±)-endo-3o

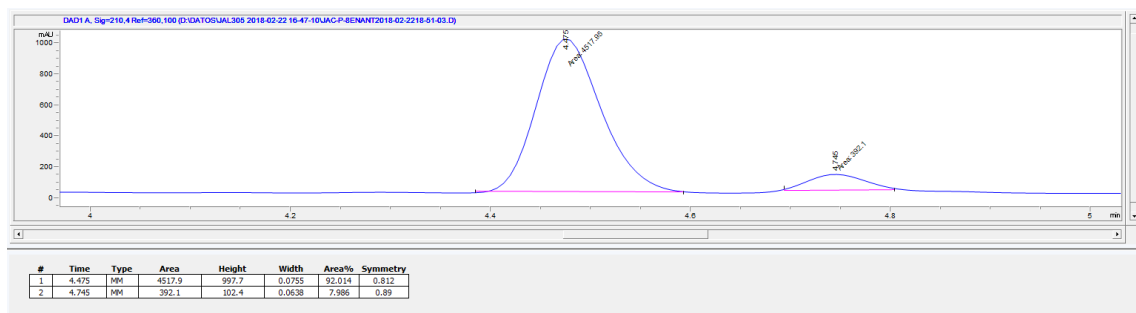

Figure S31: (+)-endo-3o; 84% ee

S30

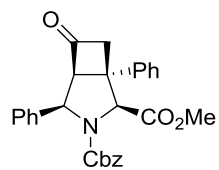

*endo-7*

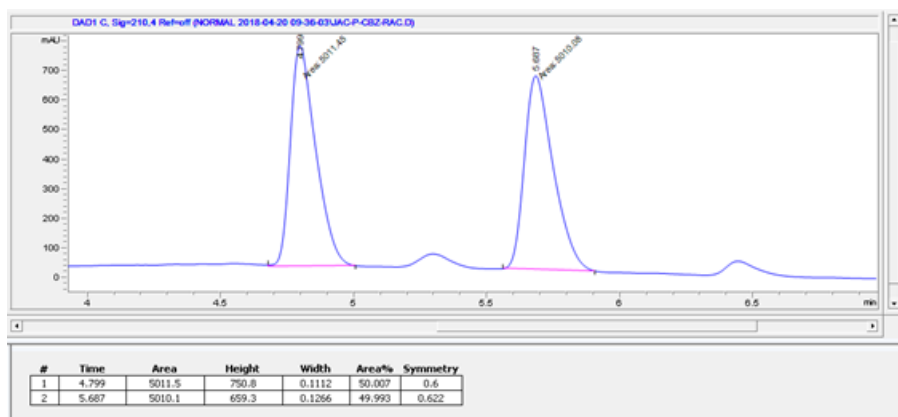

**Figure S32:** ( $\pm$ )-*endo-7*

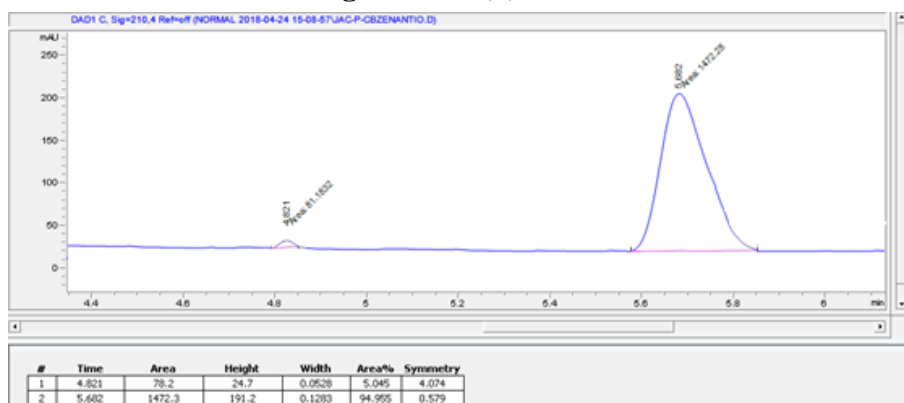

**Figure S33:** (+)-*endo-7*, 90 % *ee*

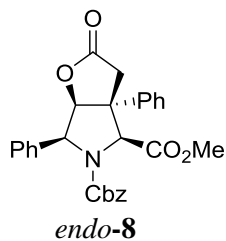

*endo-8*

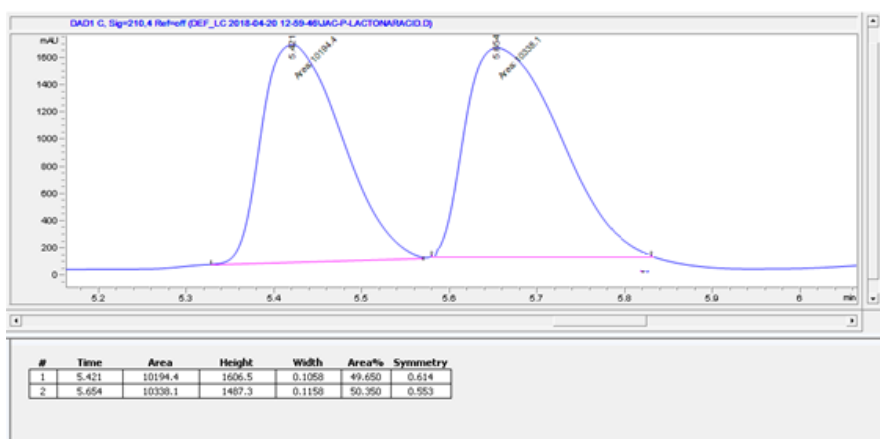

Figure S34: (±)-endo-8

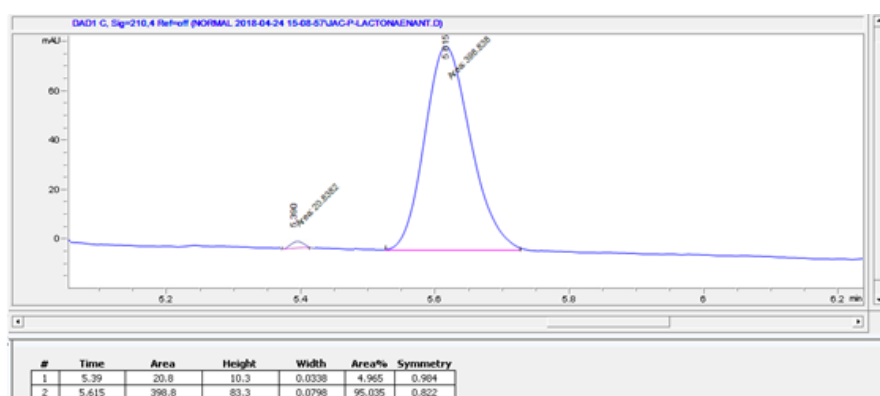

Figure S35: (+)-endo-8, 90 % ee

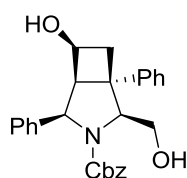

endo-9

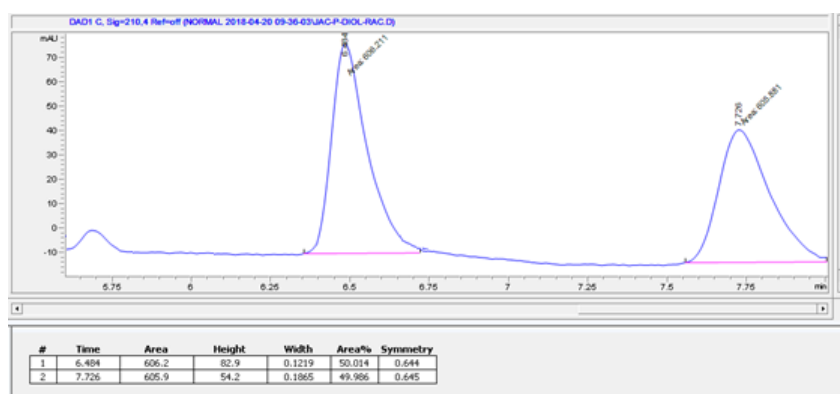

Figure S36: (±)-endo-9

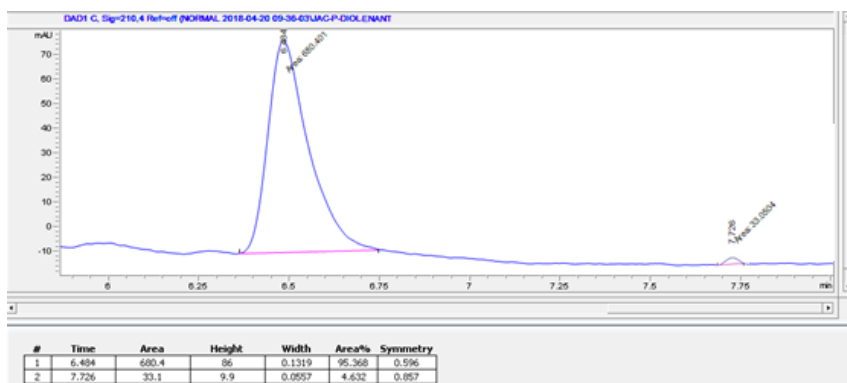

**Figure S37: (+)-endo-9, 90 % ee**

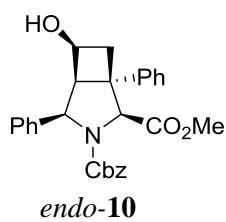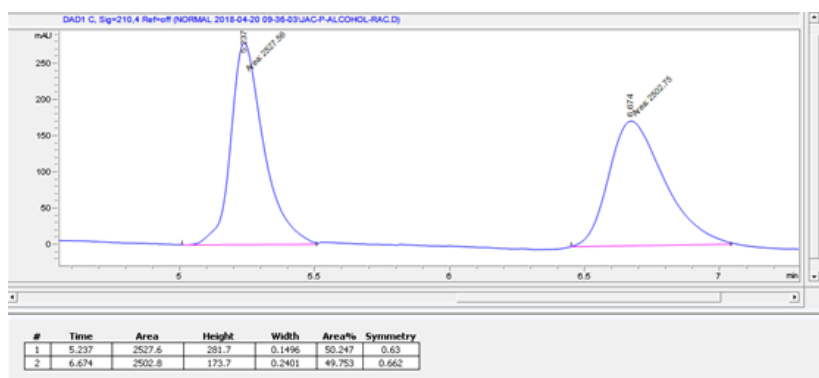

**Figure S38: (±)-endo-10**

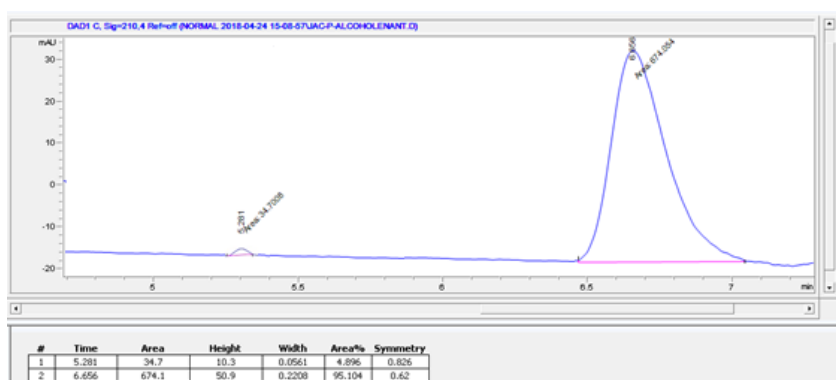

**Figure S39: (+)-endo-10, 90 % ee**



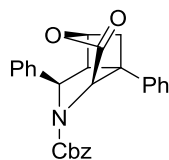*endo*-11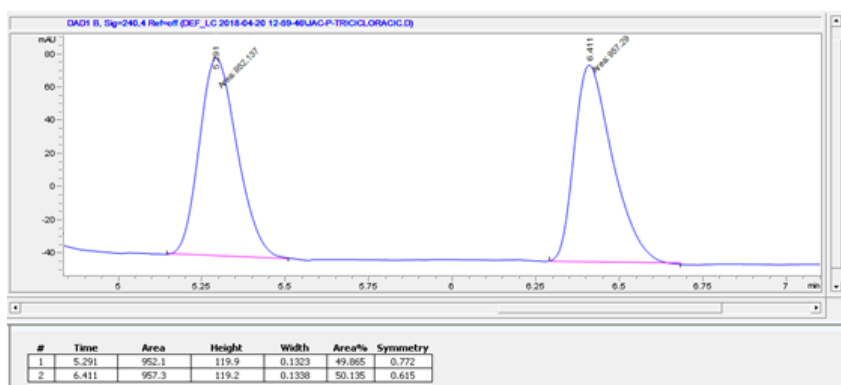Figure S40: ( $\pm$ )-*endo*-11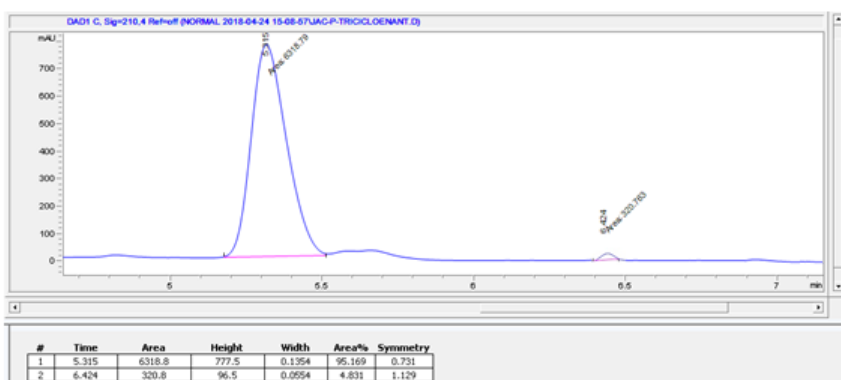Figure S41: (+)-*endo*-11, 90 % *ee*

## 6. NMR spectra collection

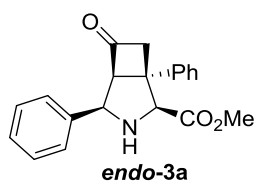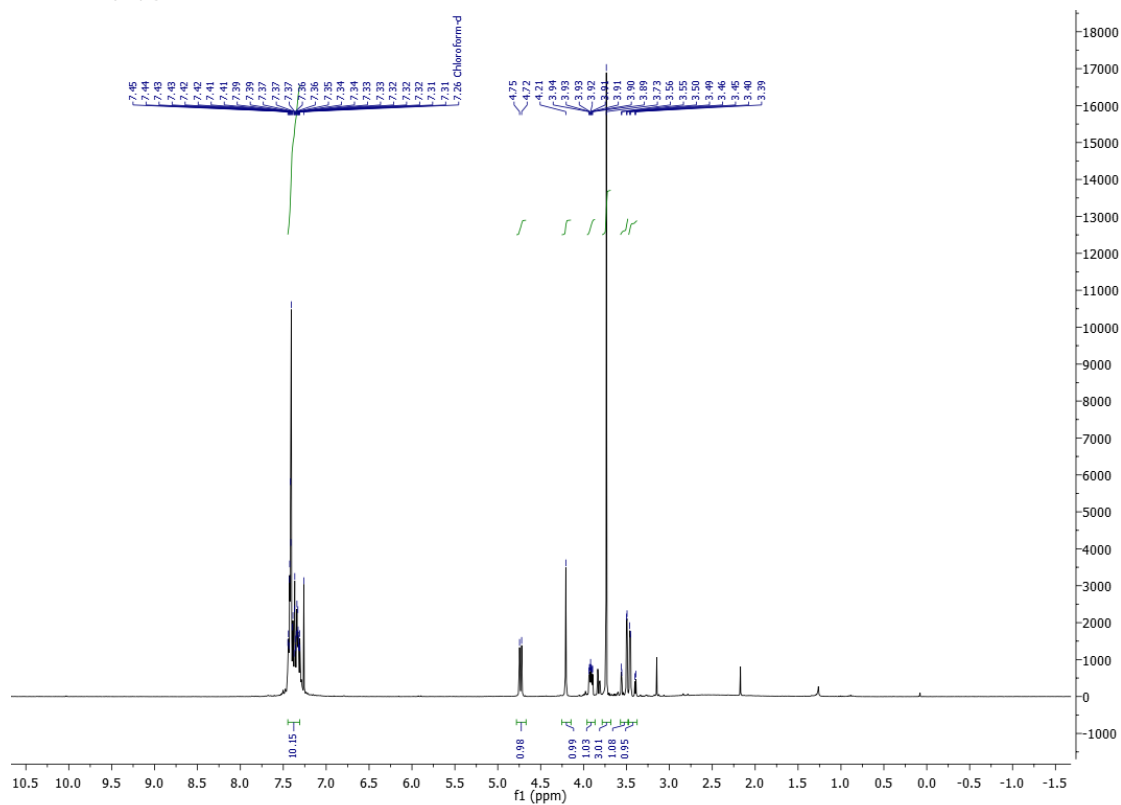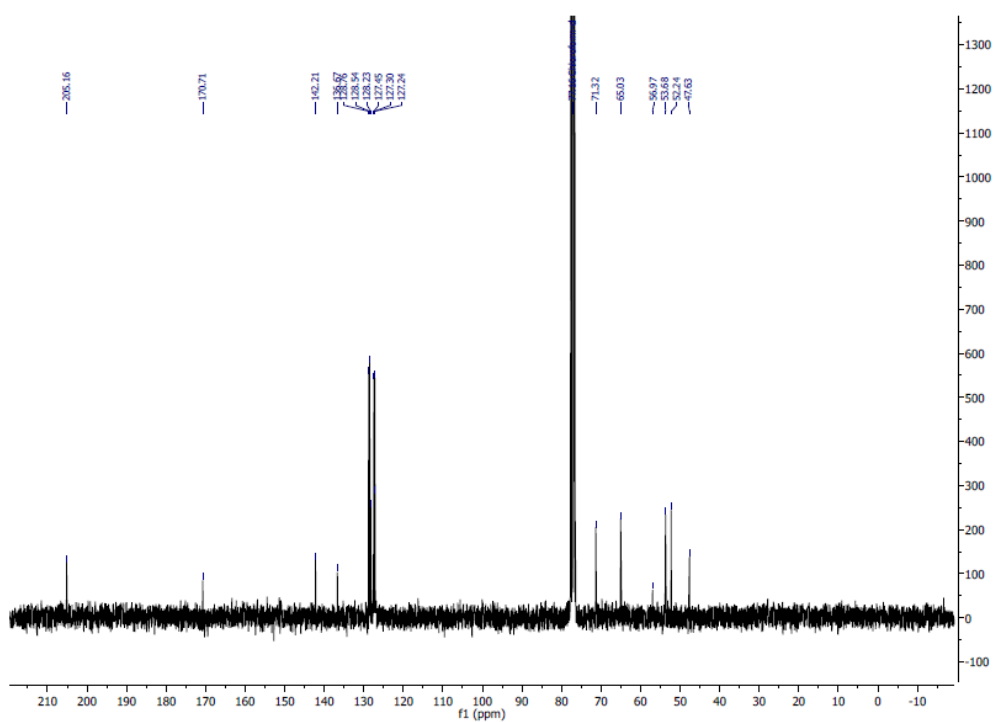

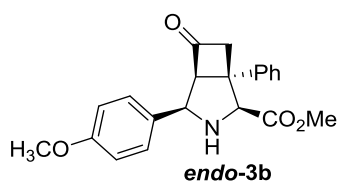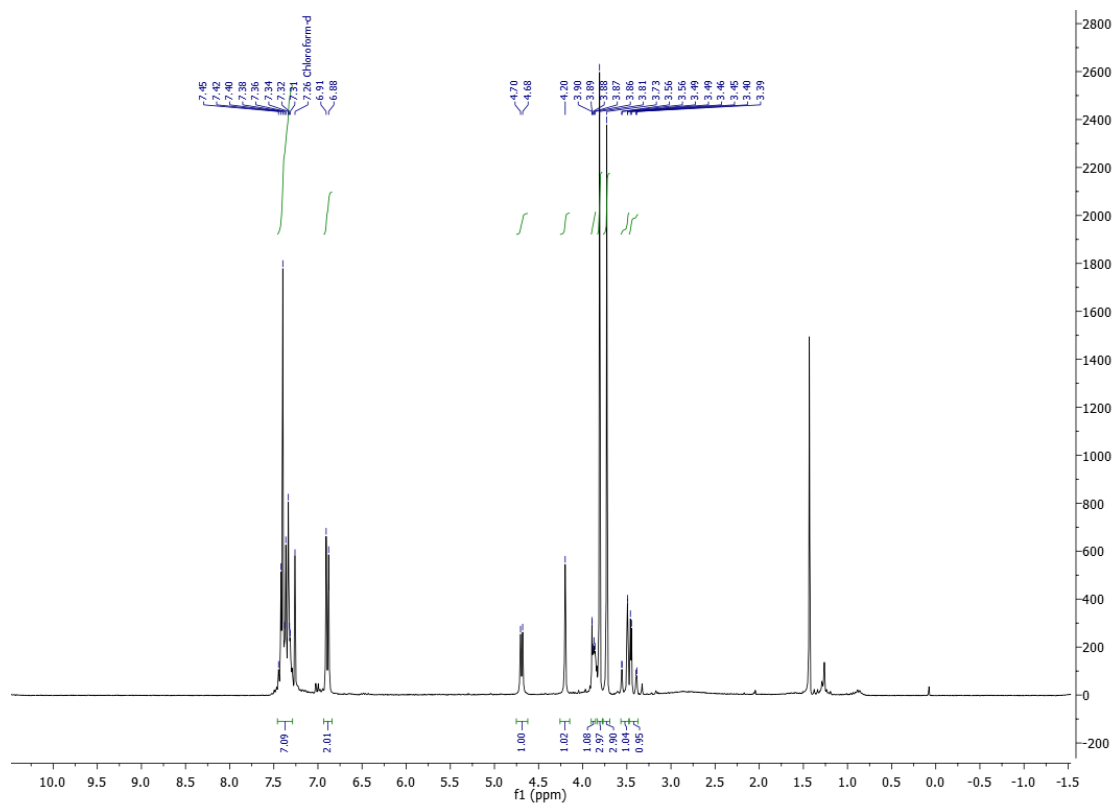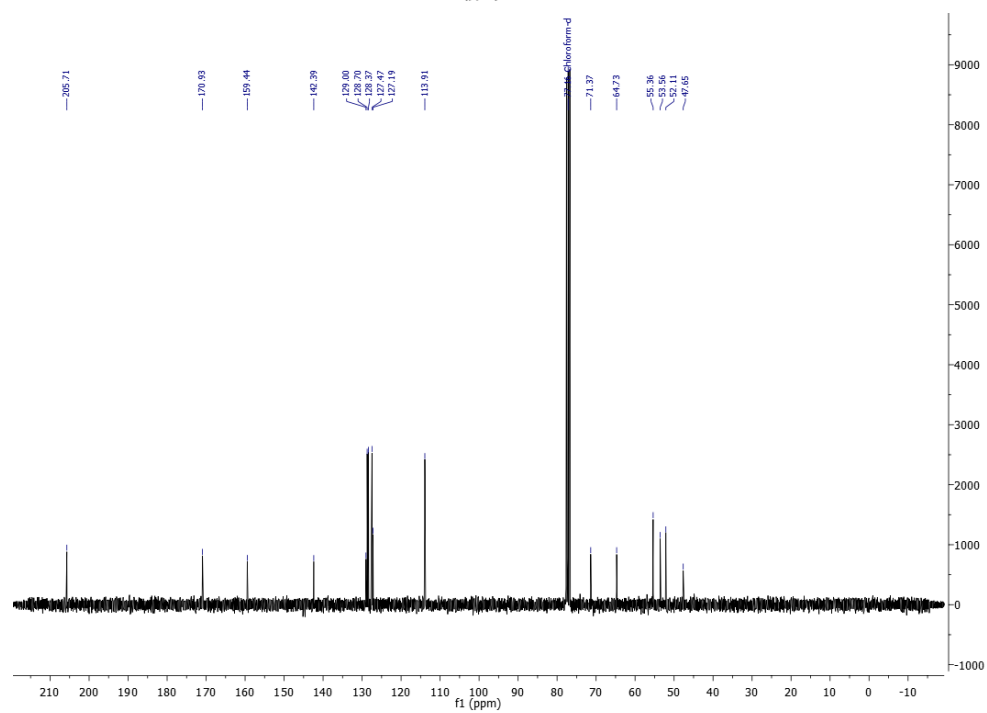

The existence of seven aliphatic carbons in compound *endo*-**3b** was determined by recording the  $^{13}\text{C}$ -NMR in benzene- $d_6$ .

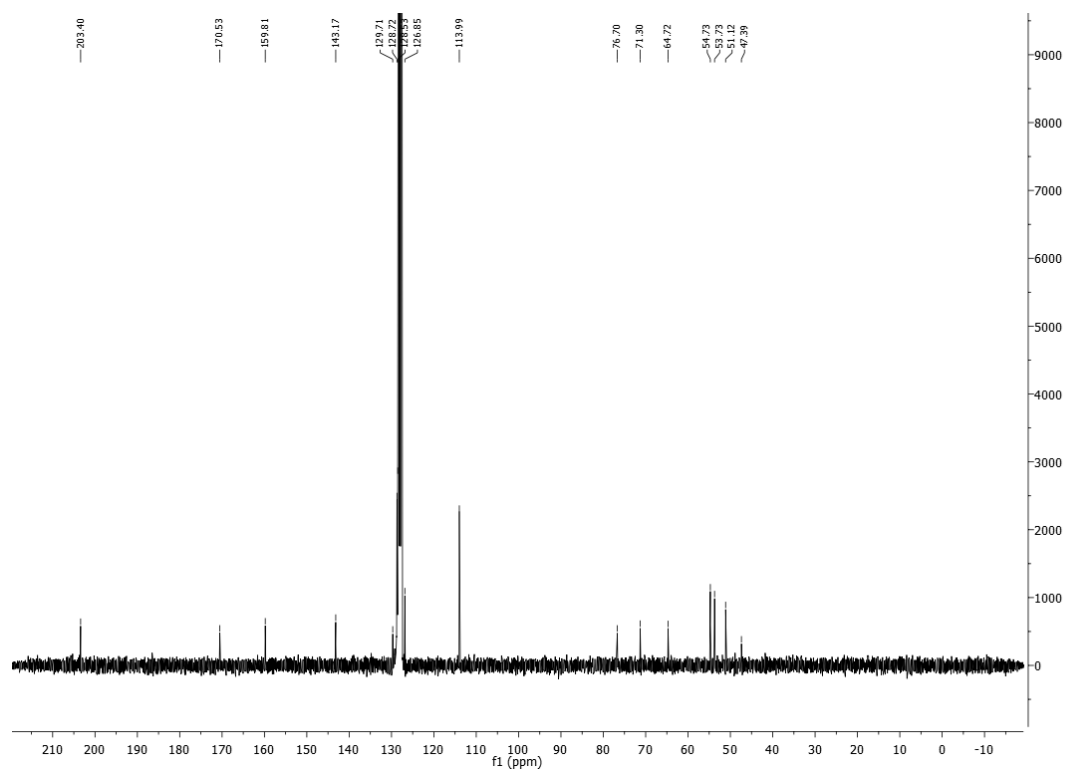

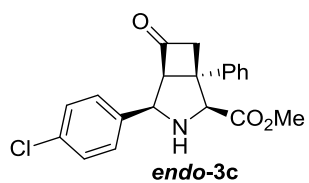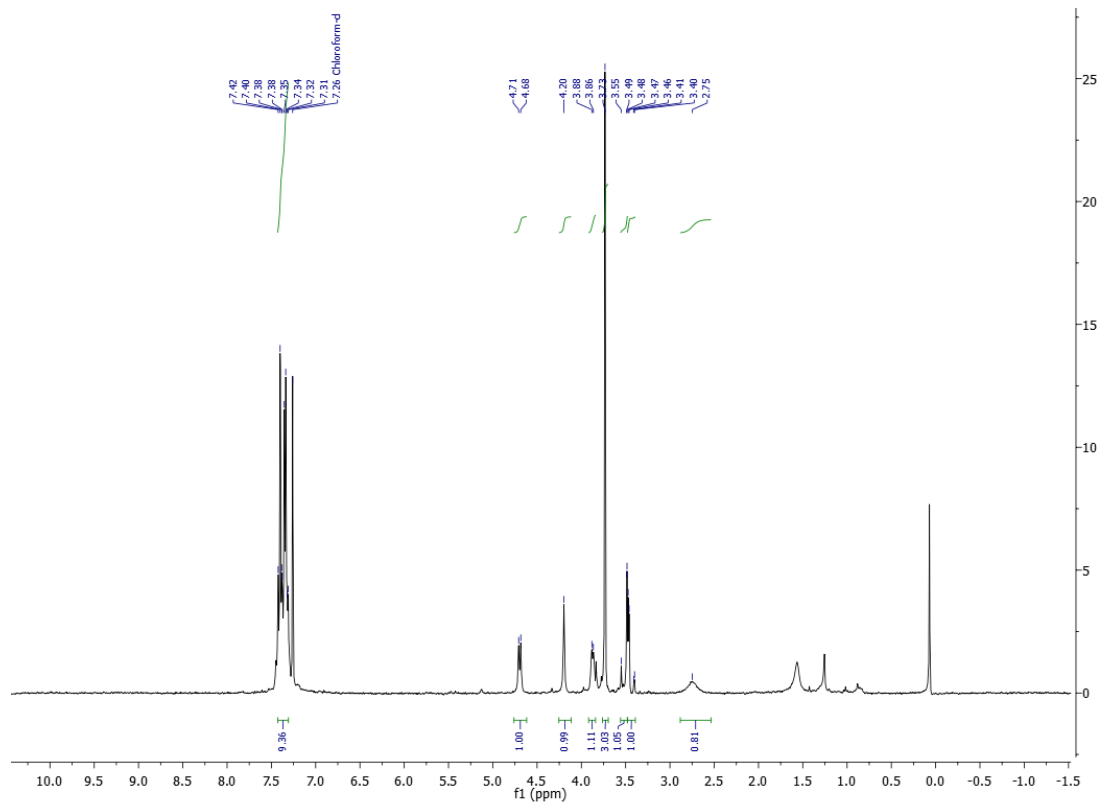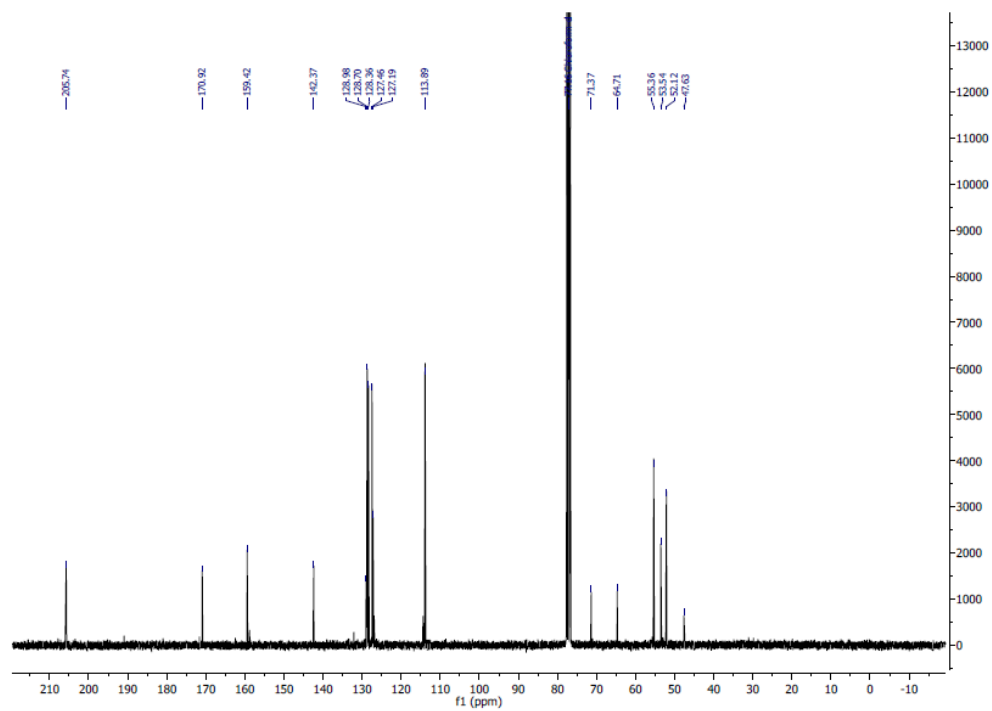

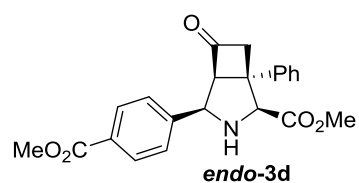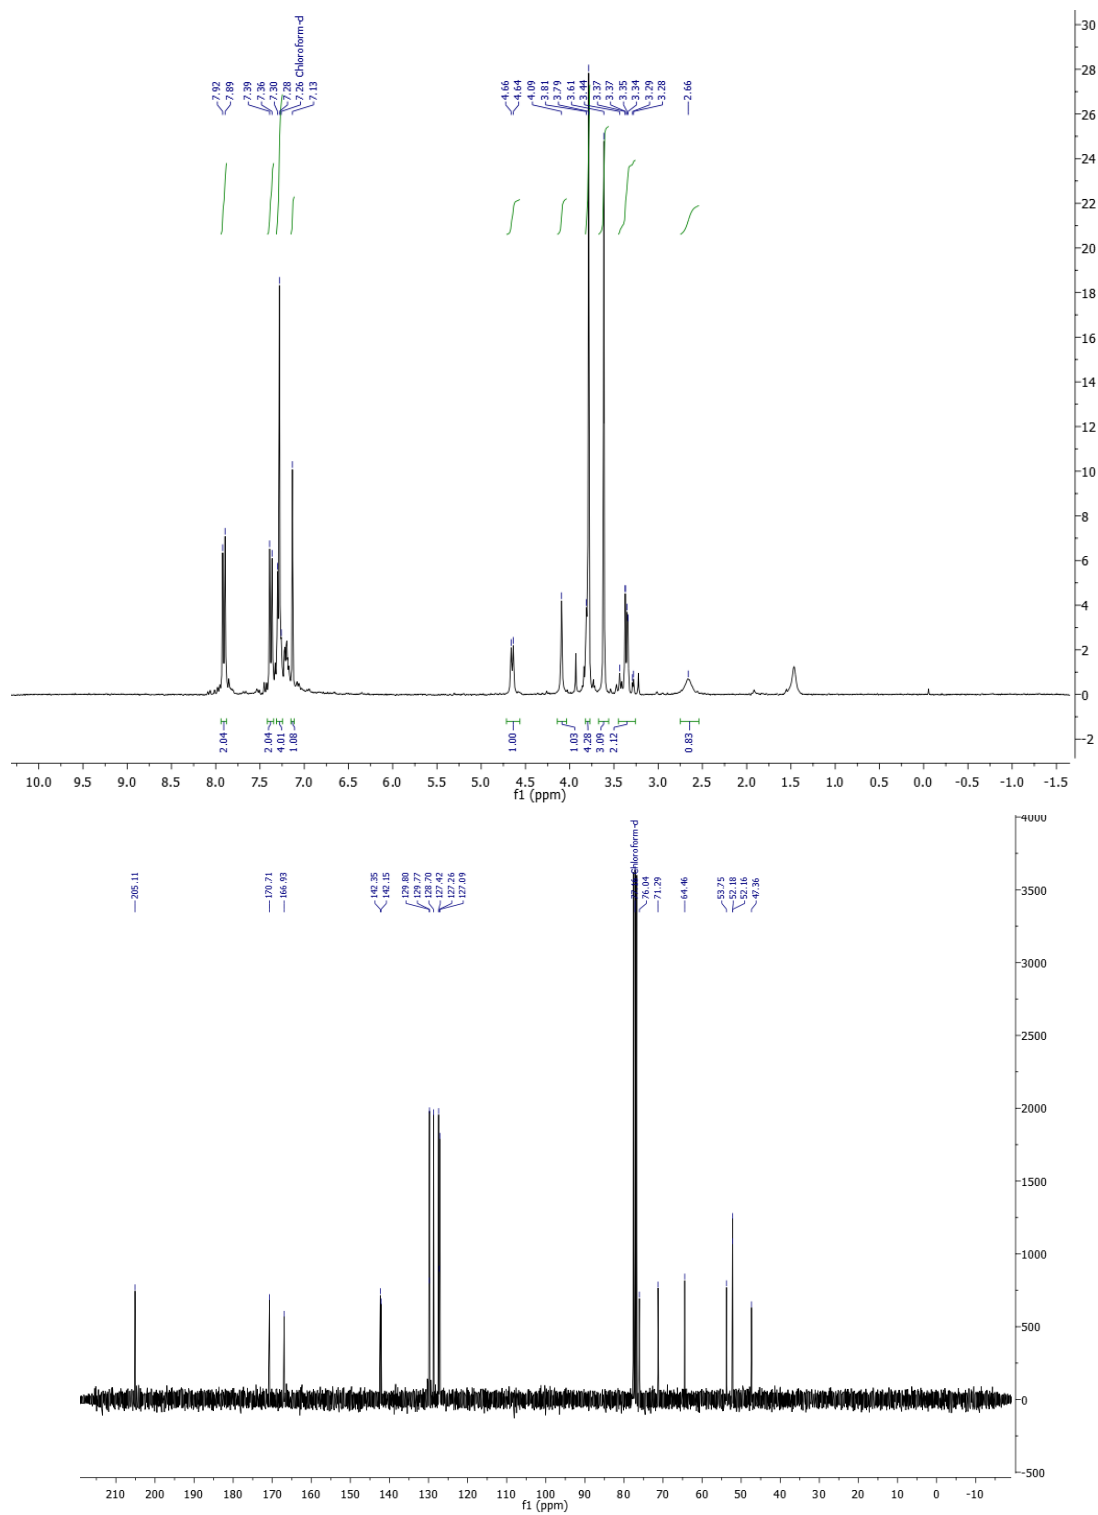

Scaling up in the region between 47.0-54.5 ppm:

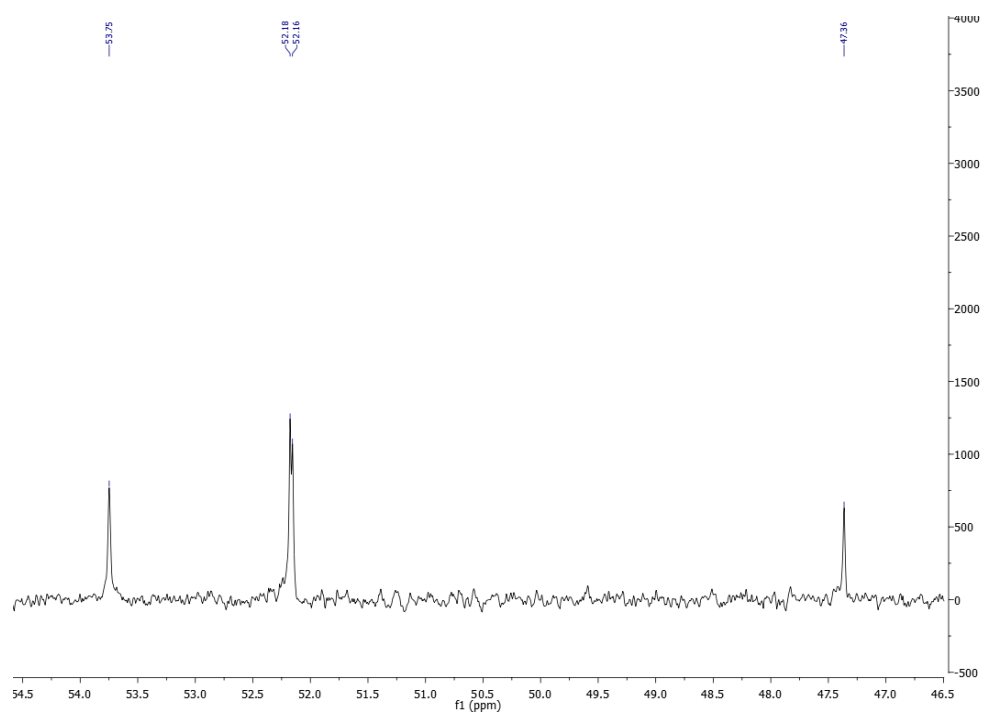

S40

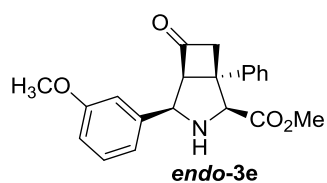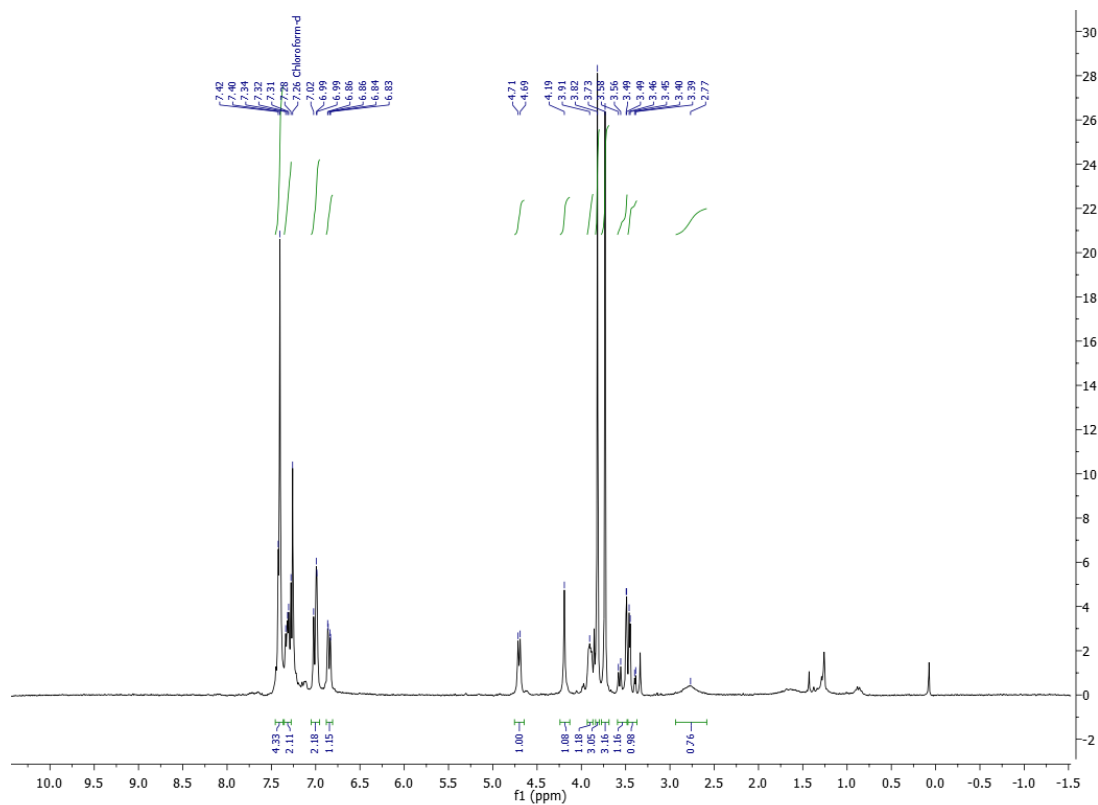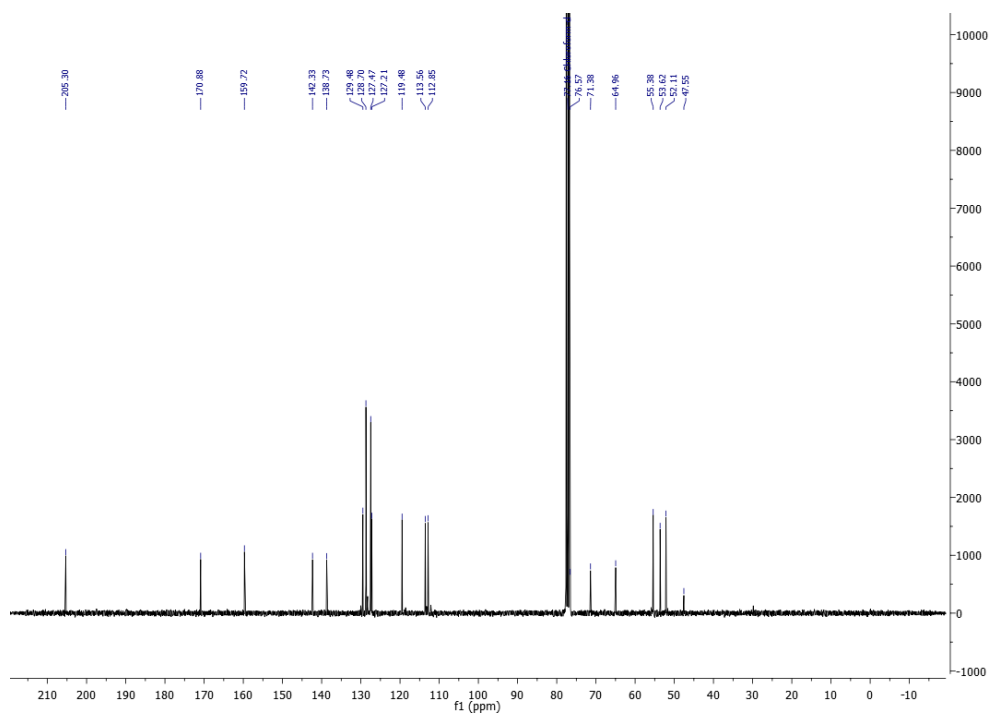



S41

Scaling up in the region 62.0-79.0 ppm

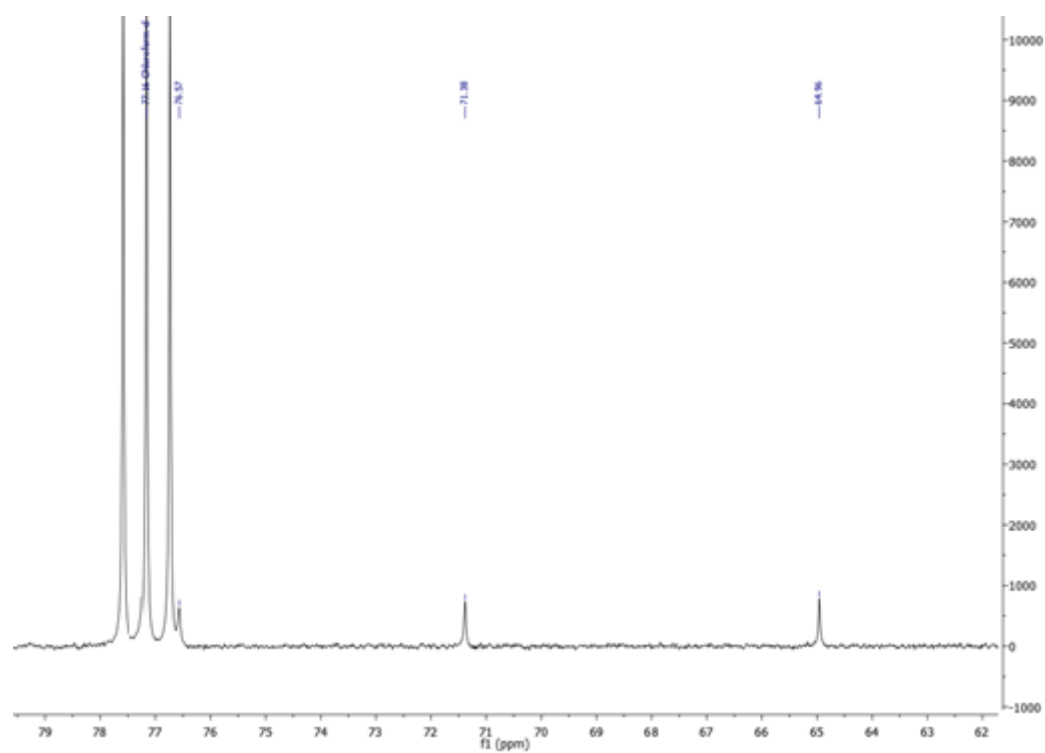

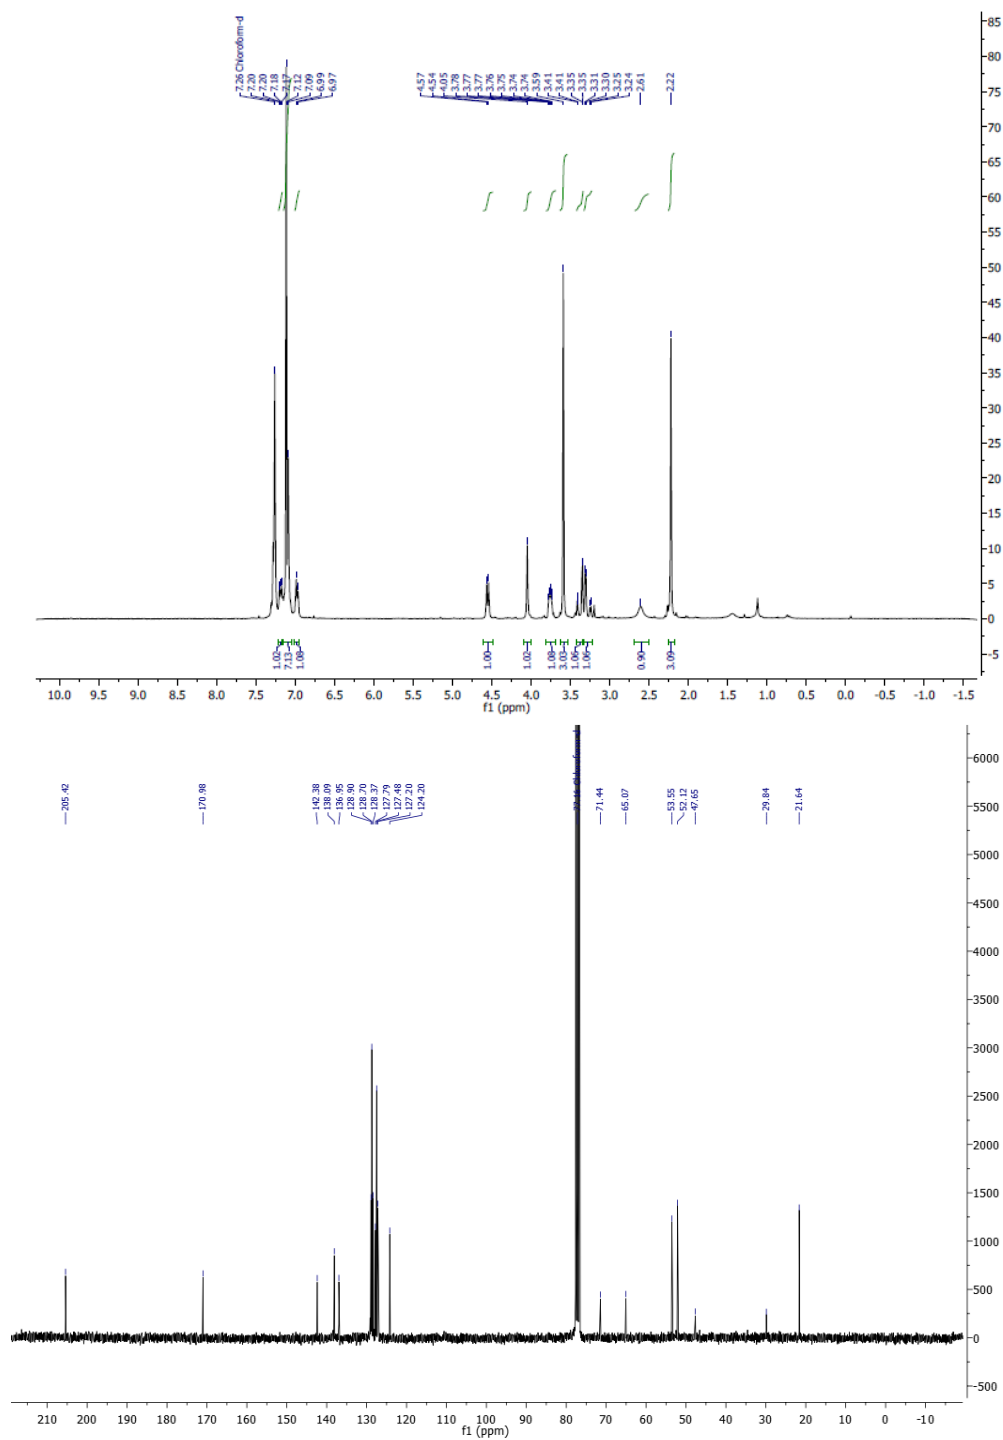

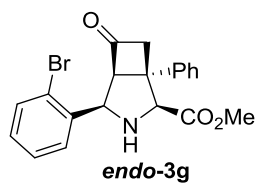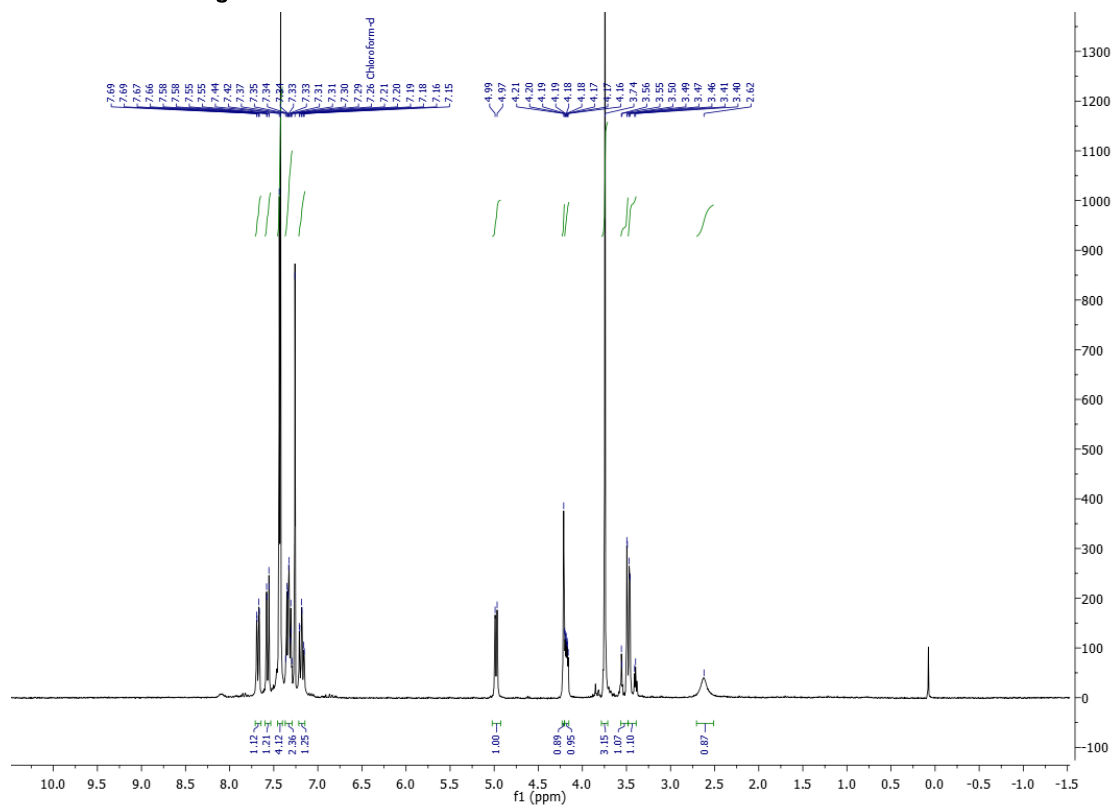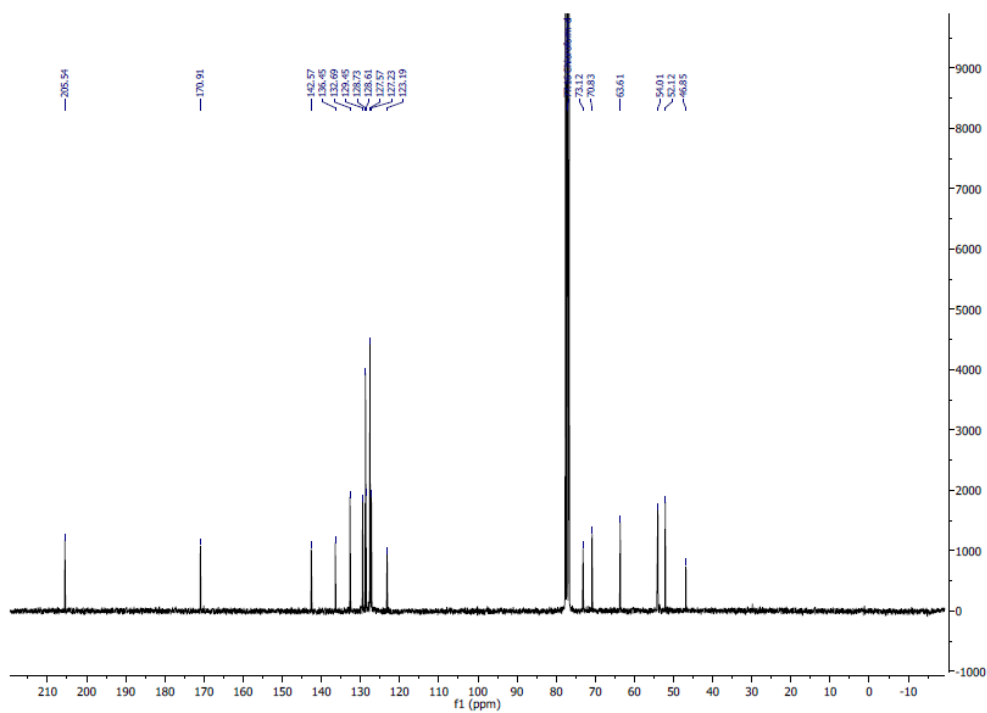

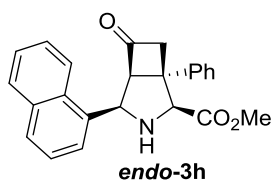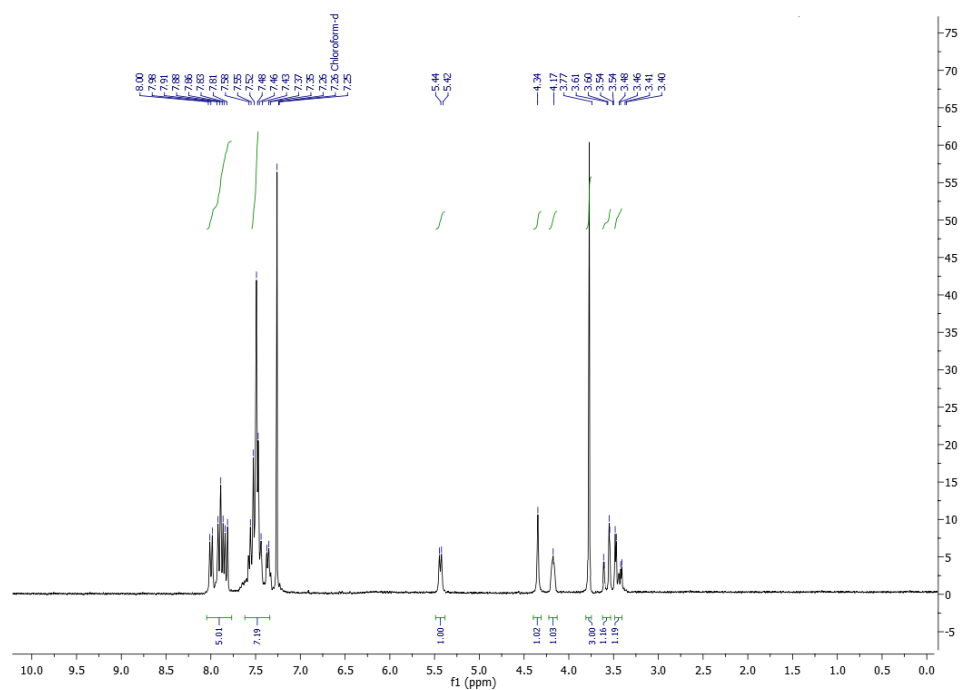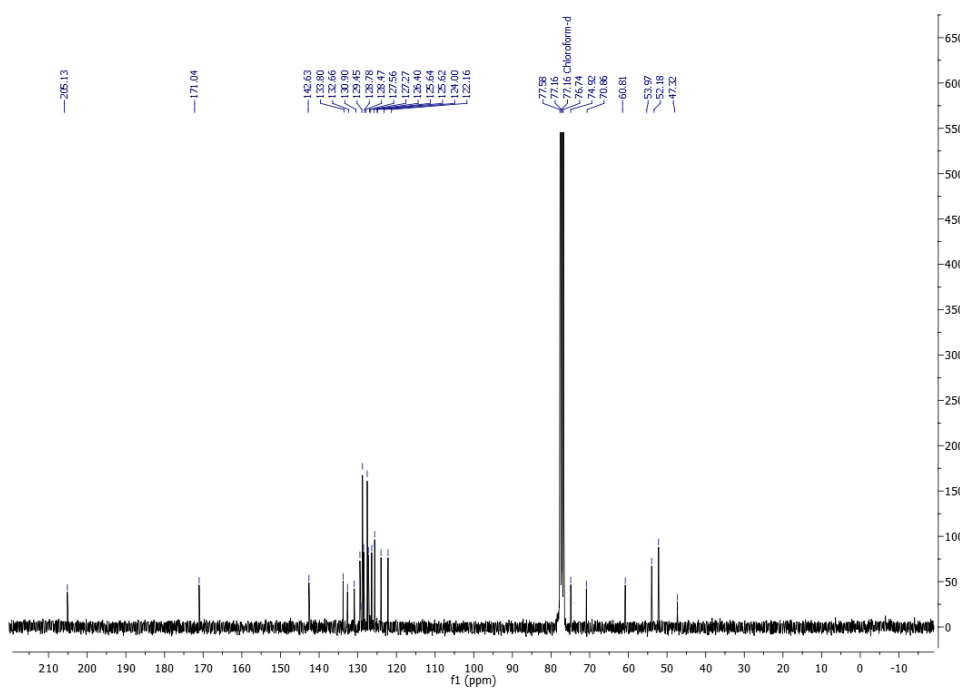

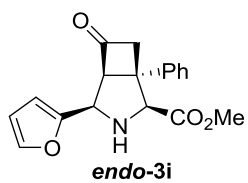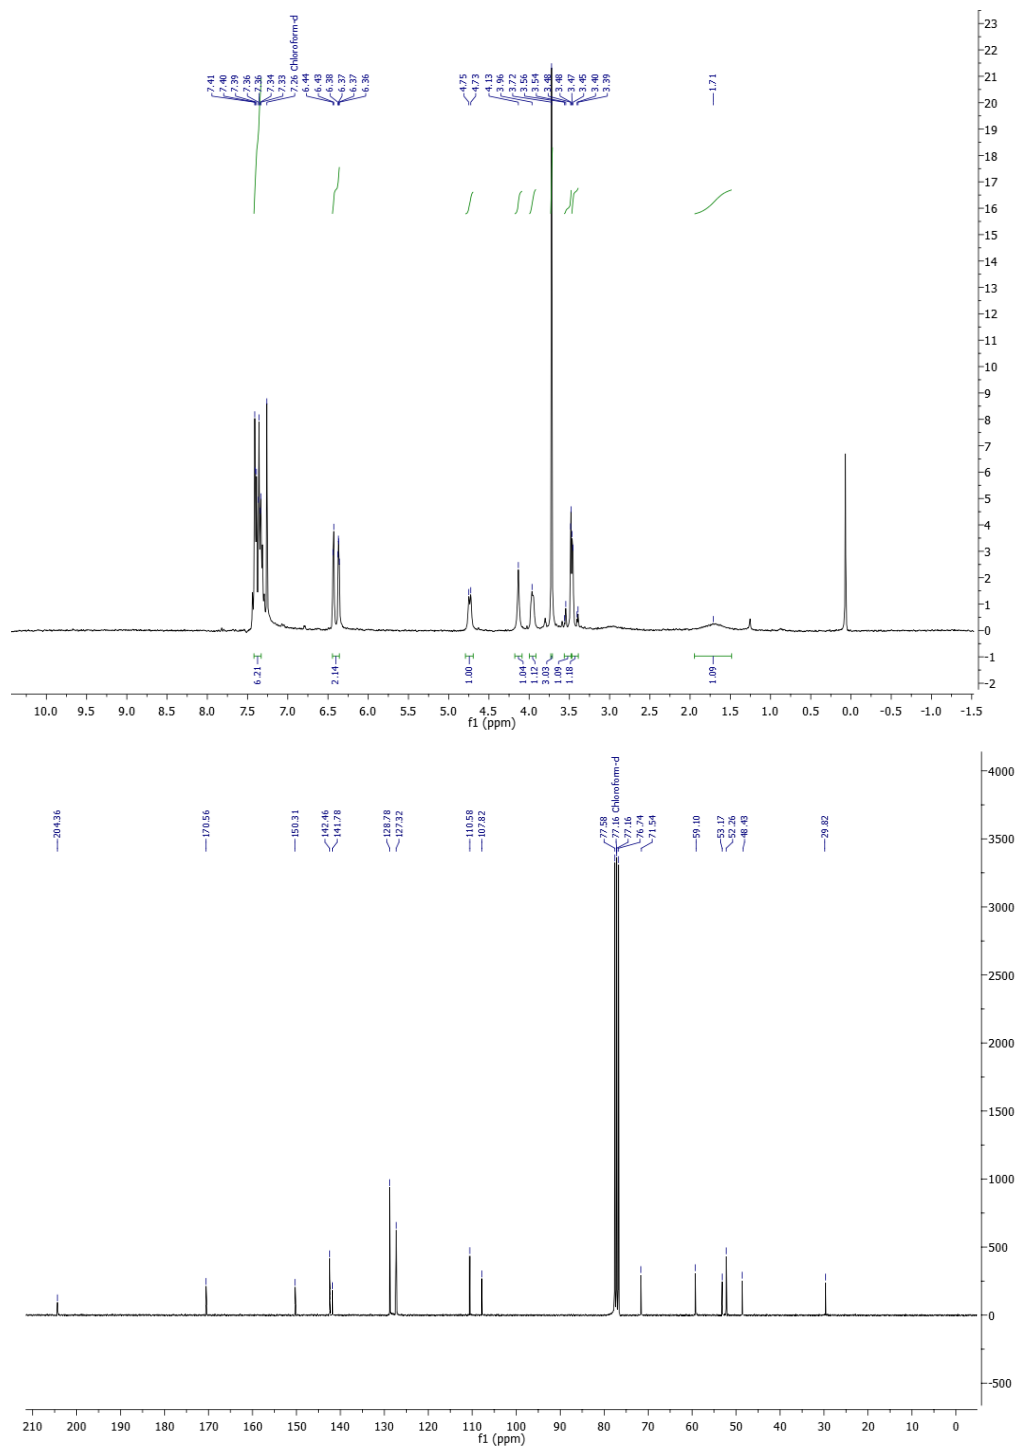

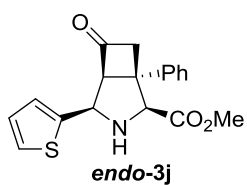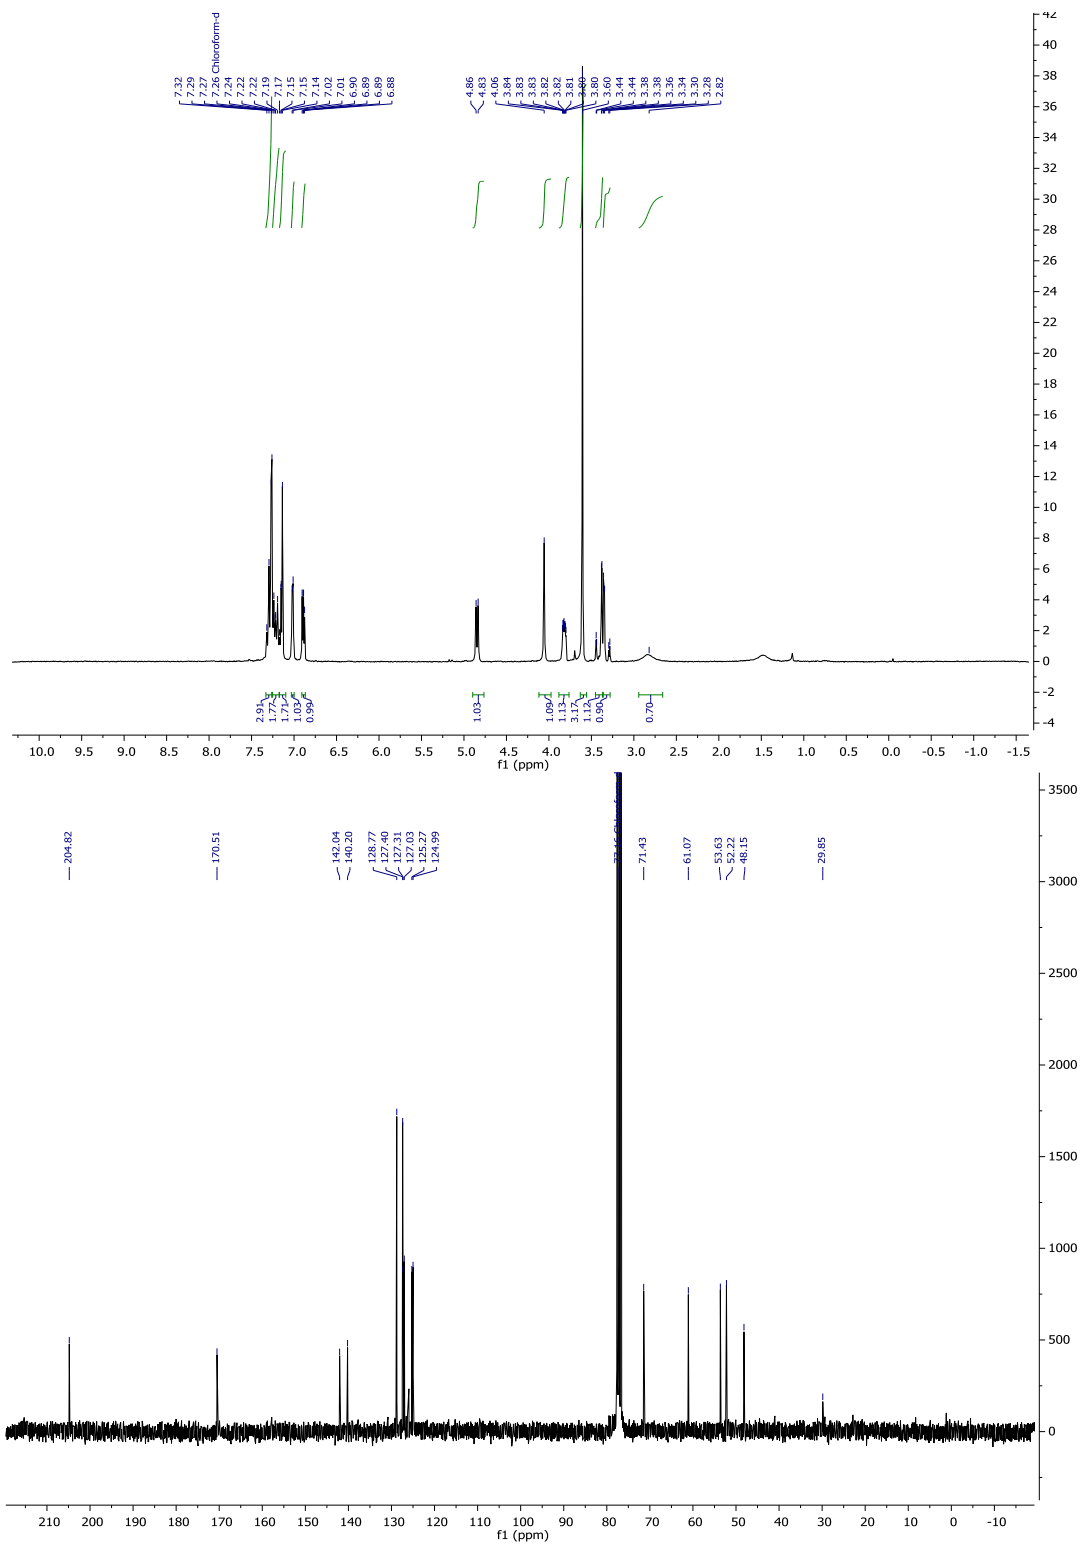

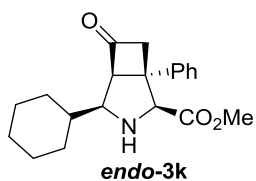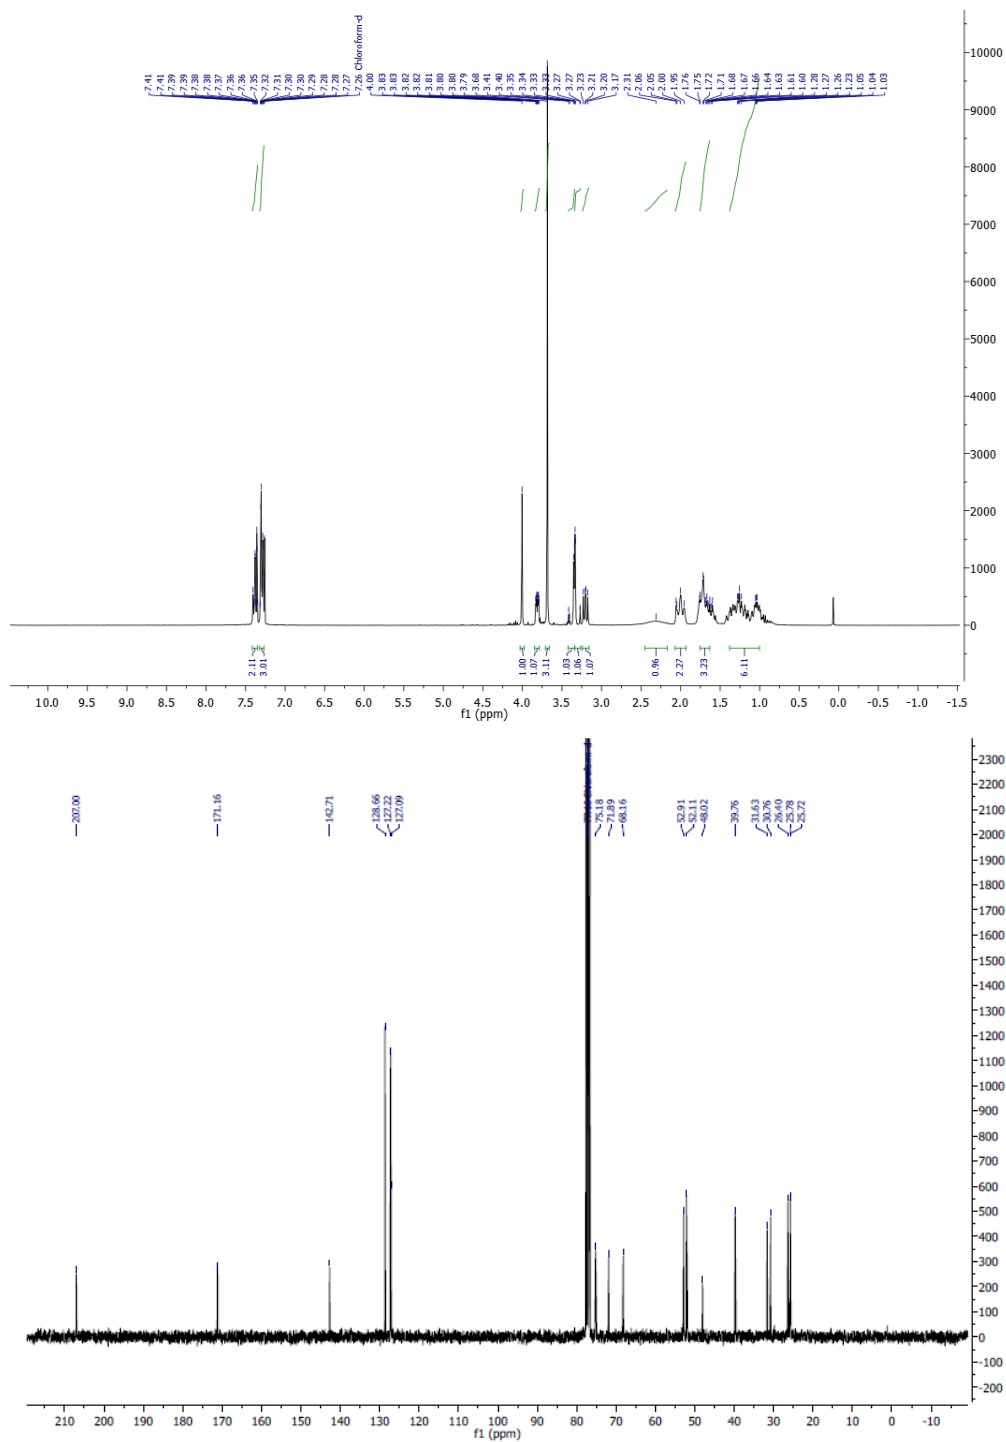

S48

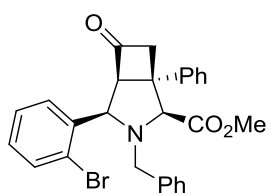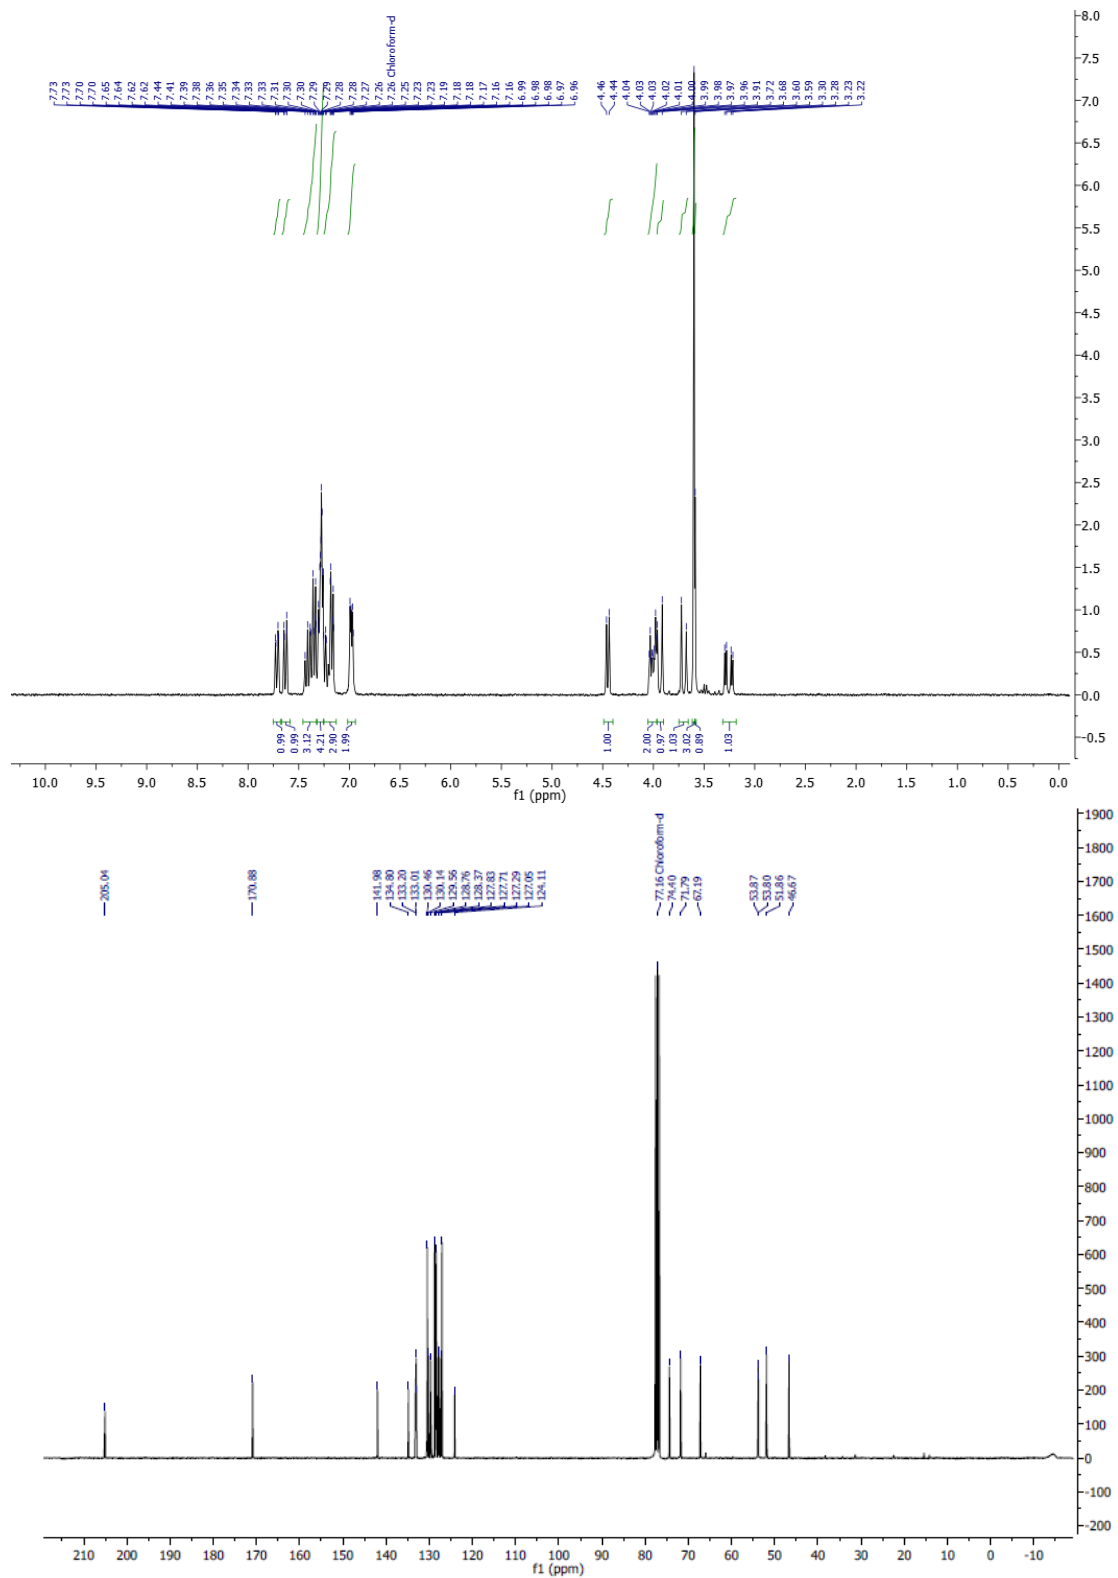



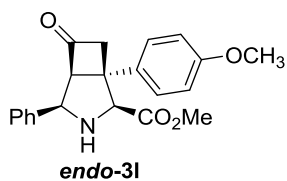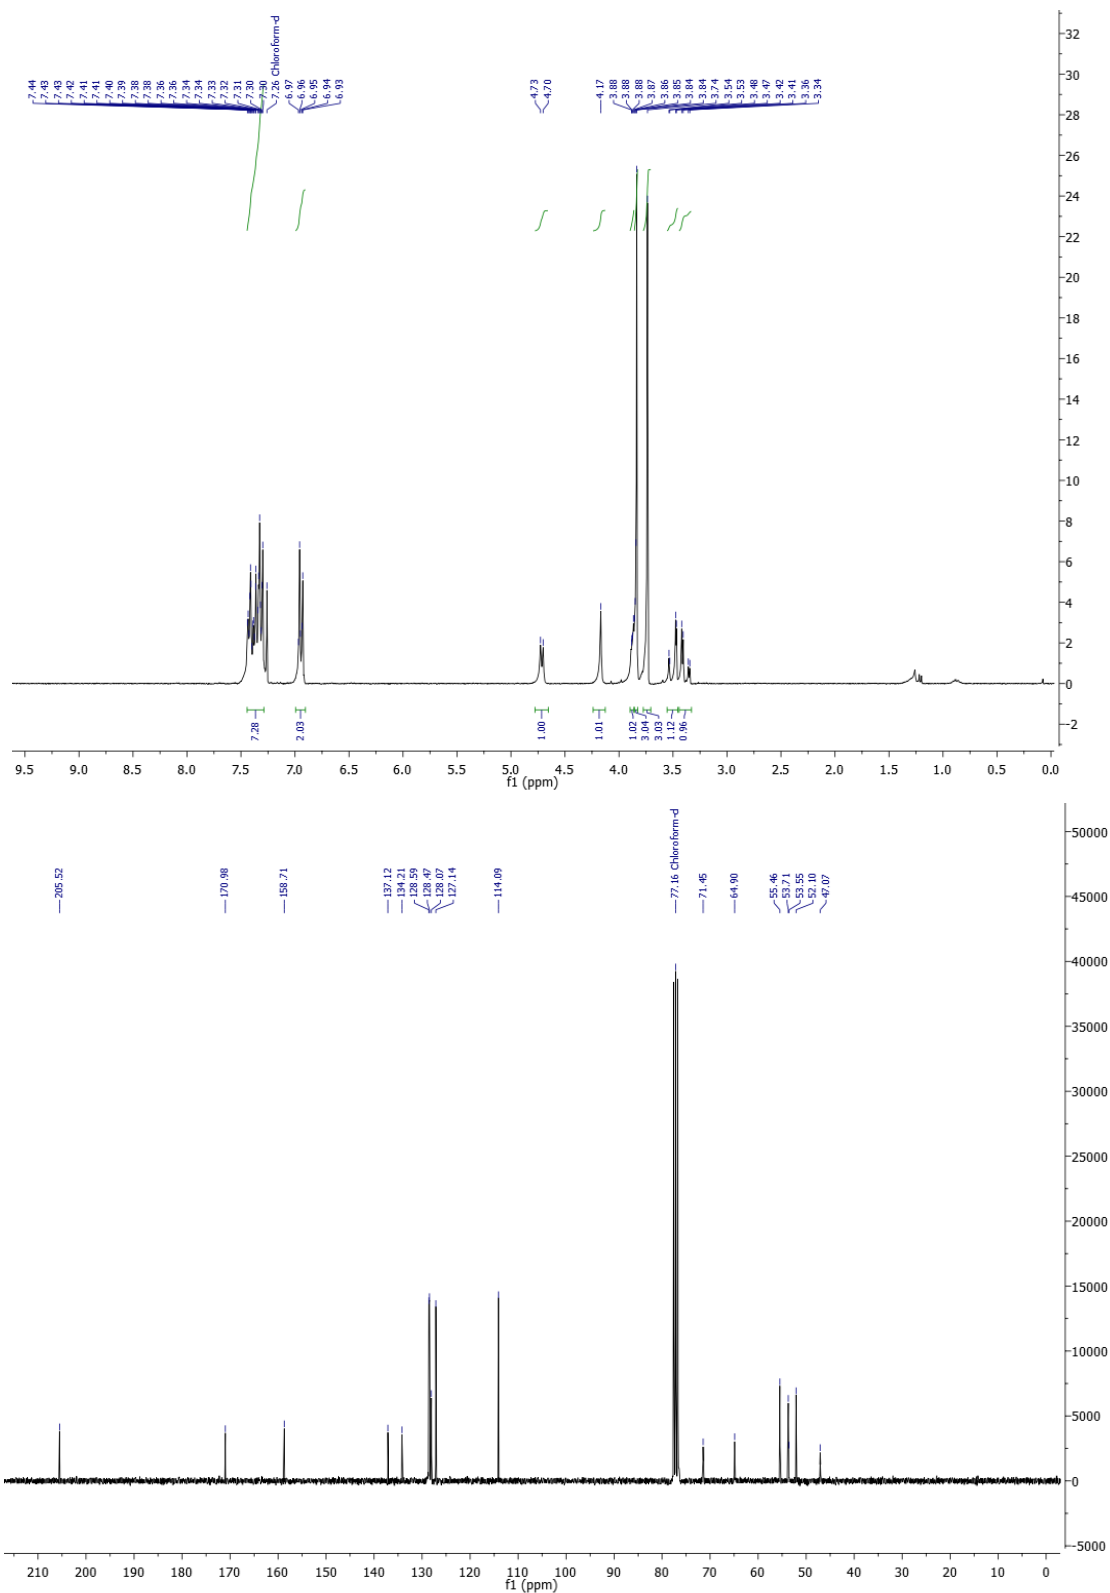

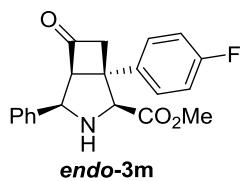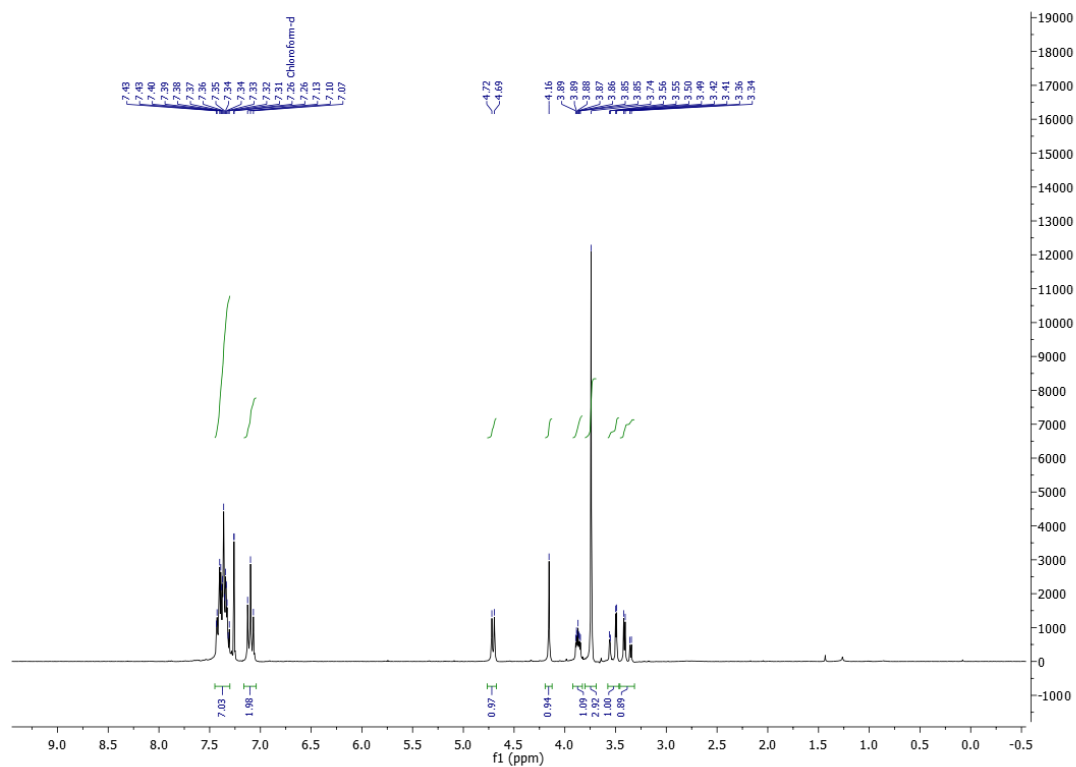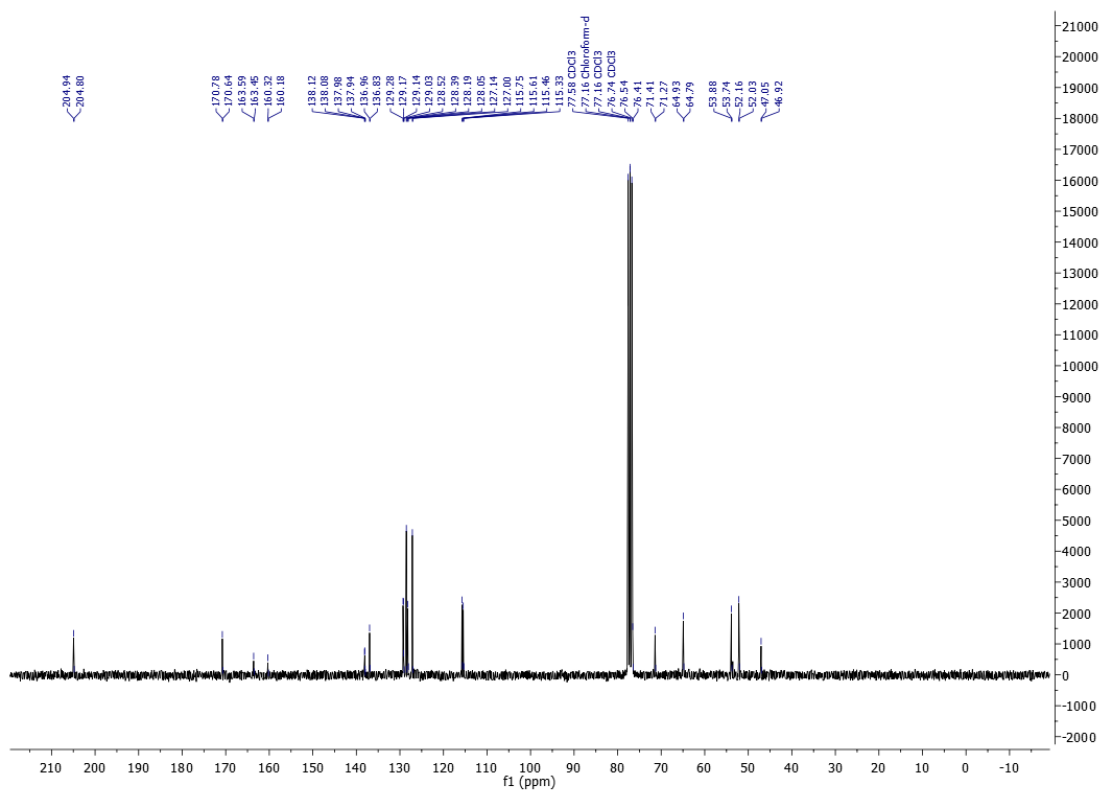

S51

$^{19}\text{F}$ -NMR spectrum:

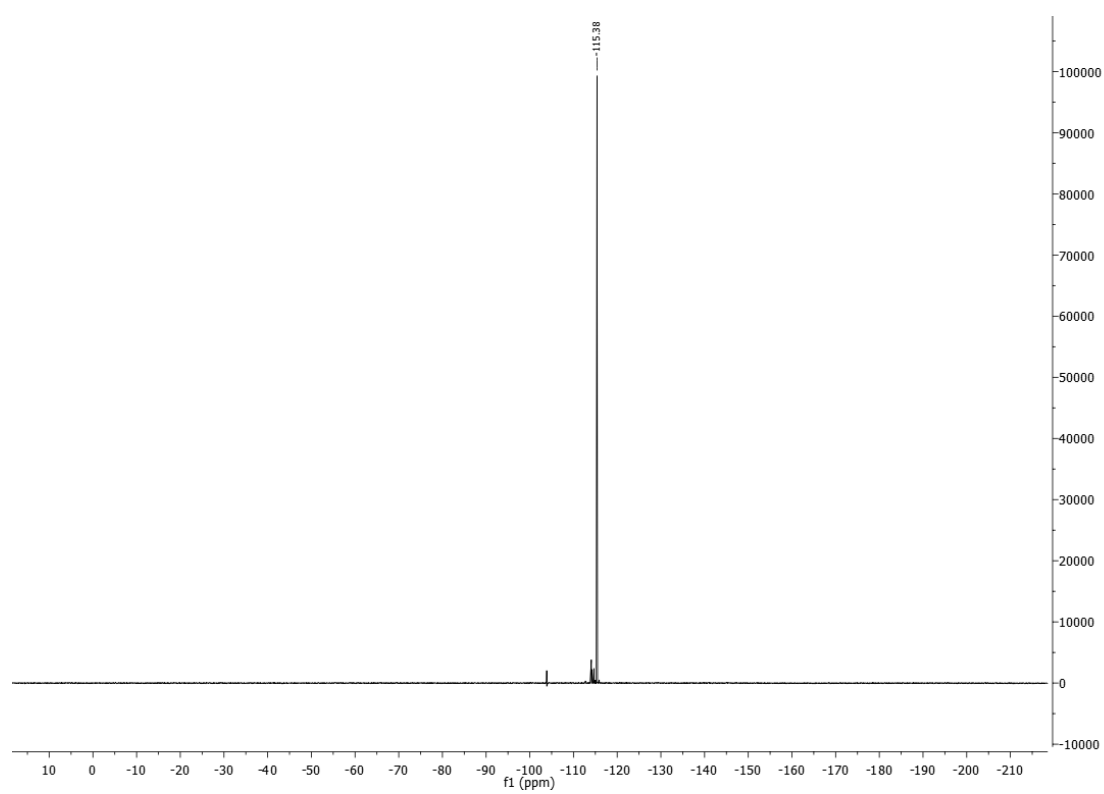

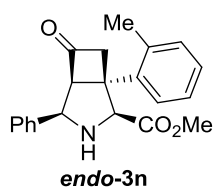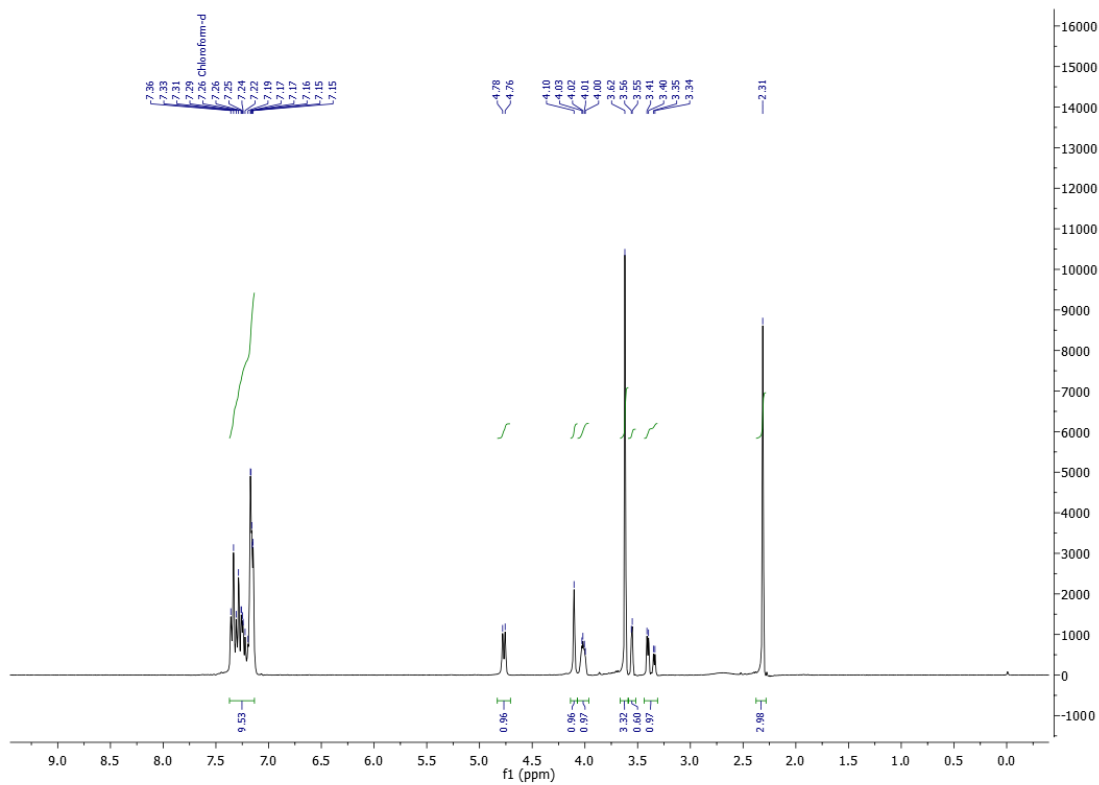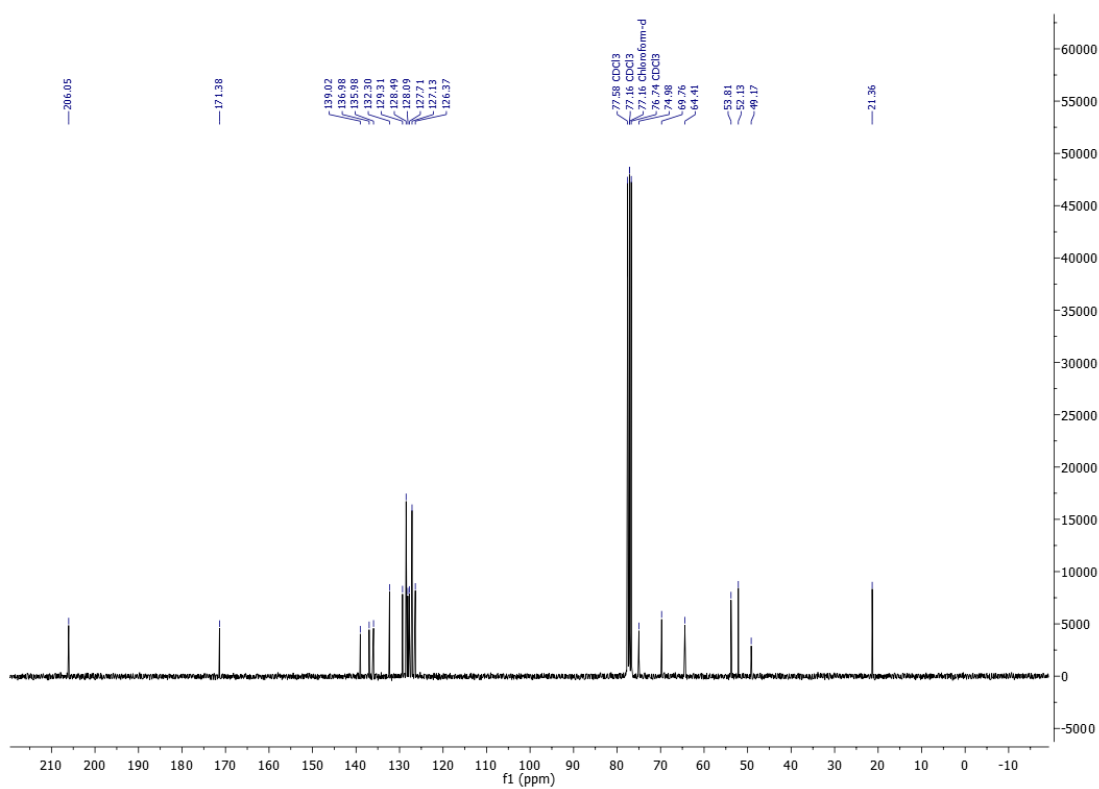

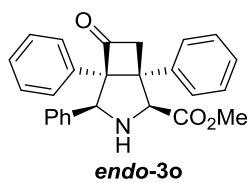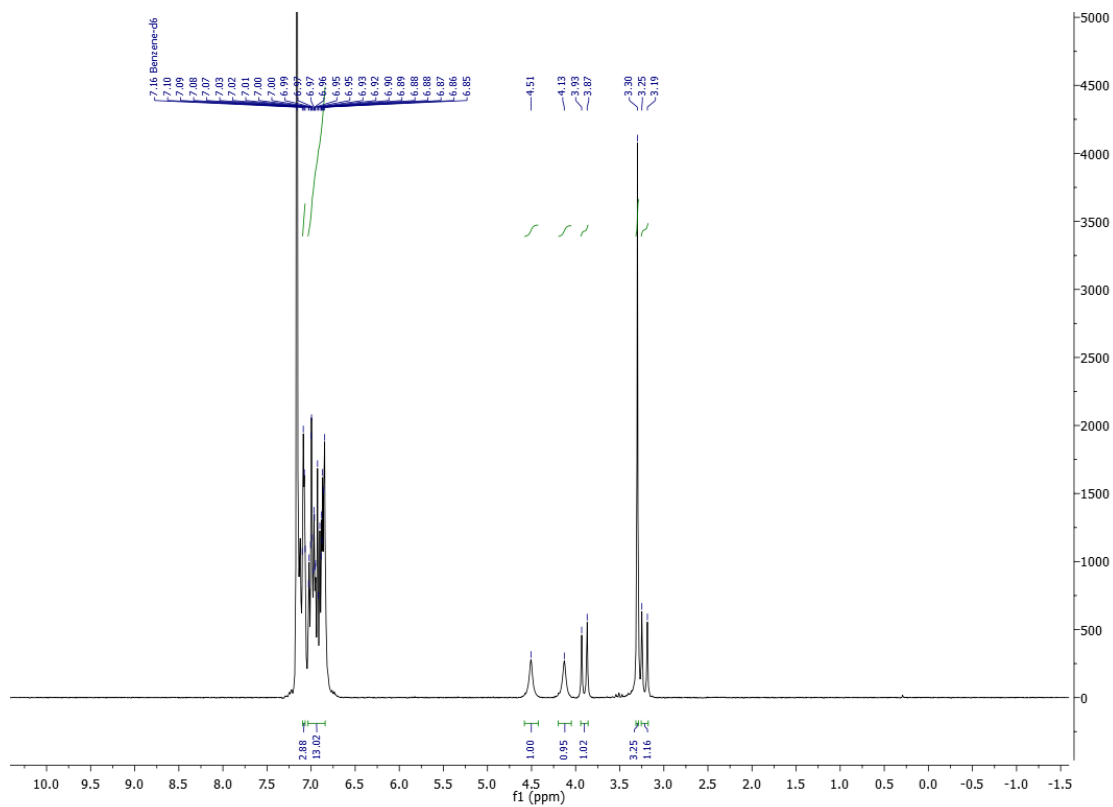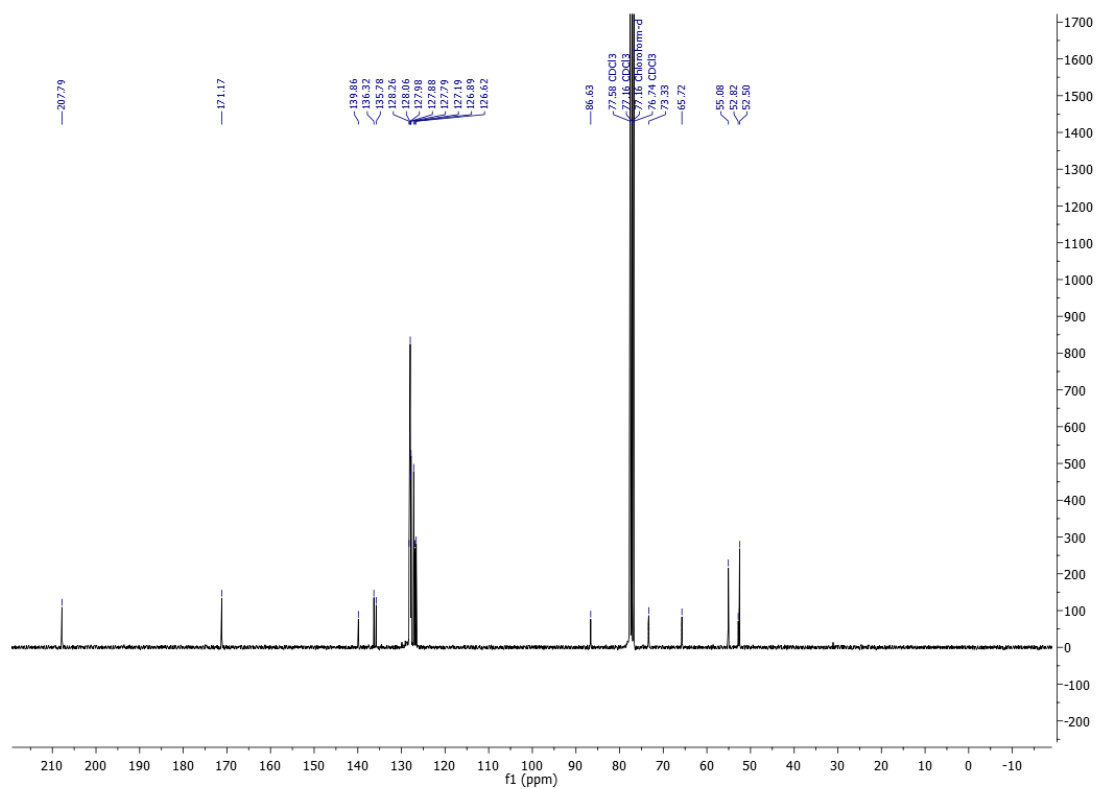

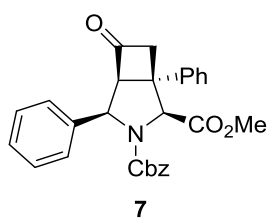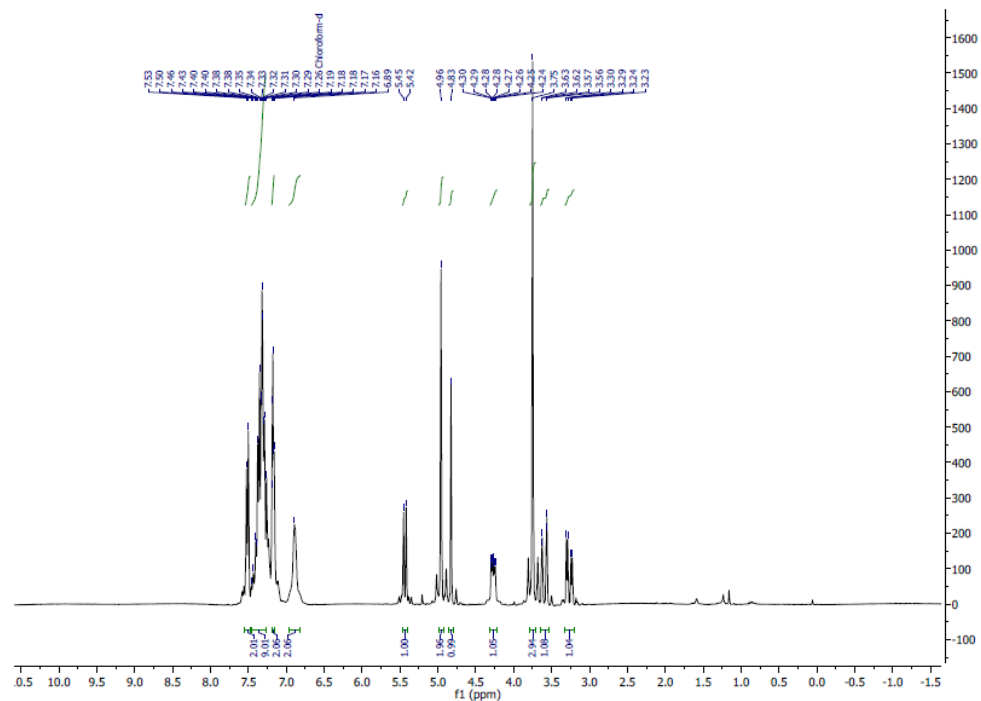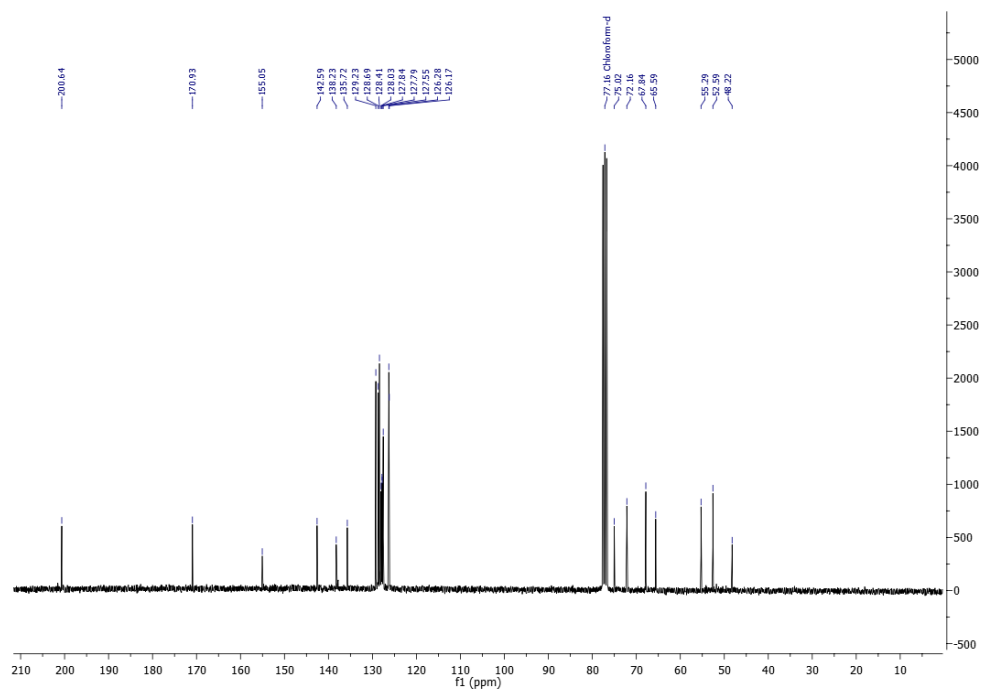

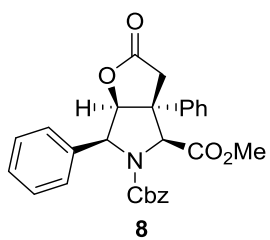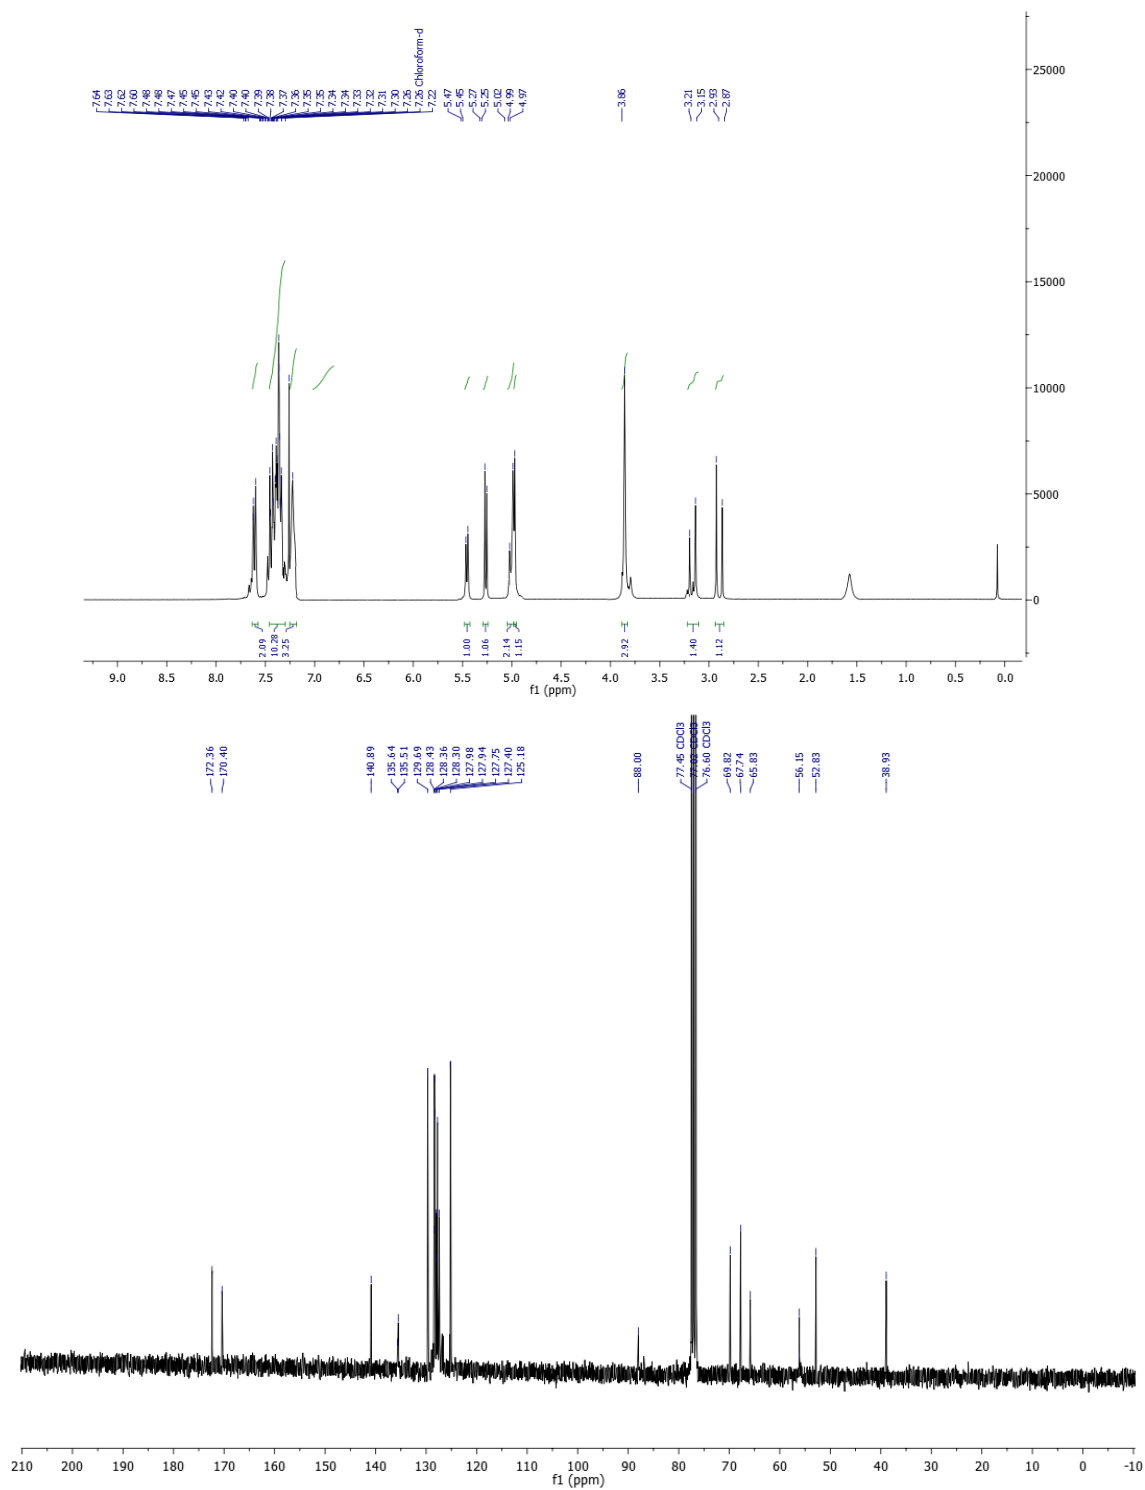

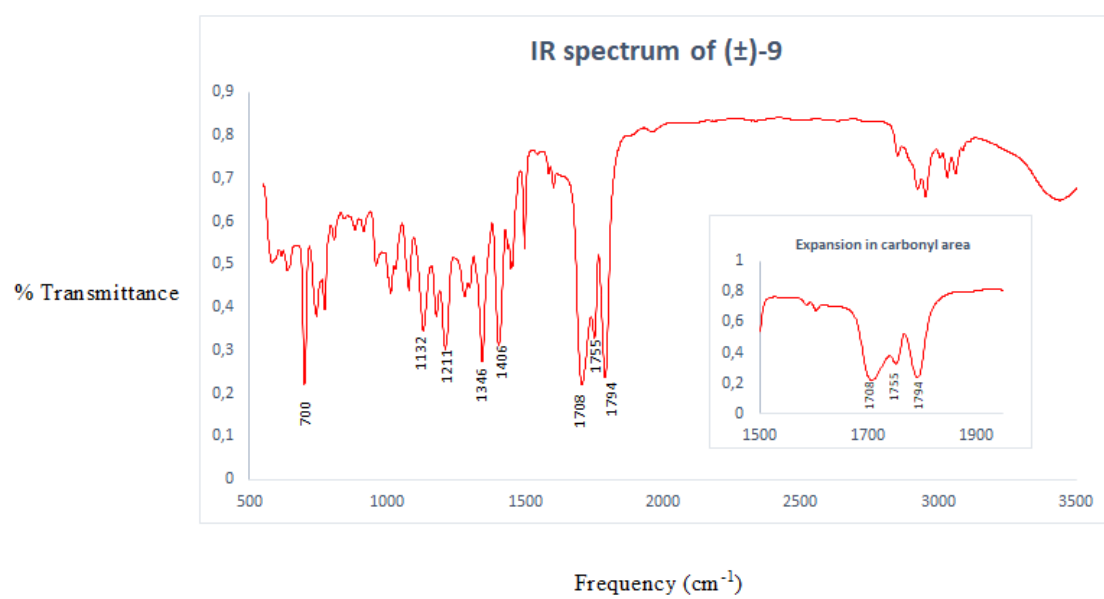



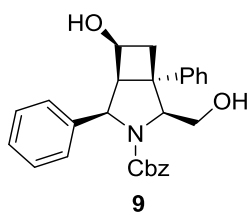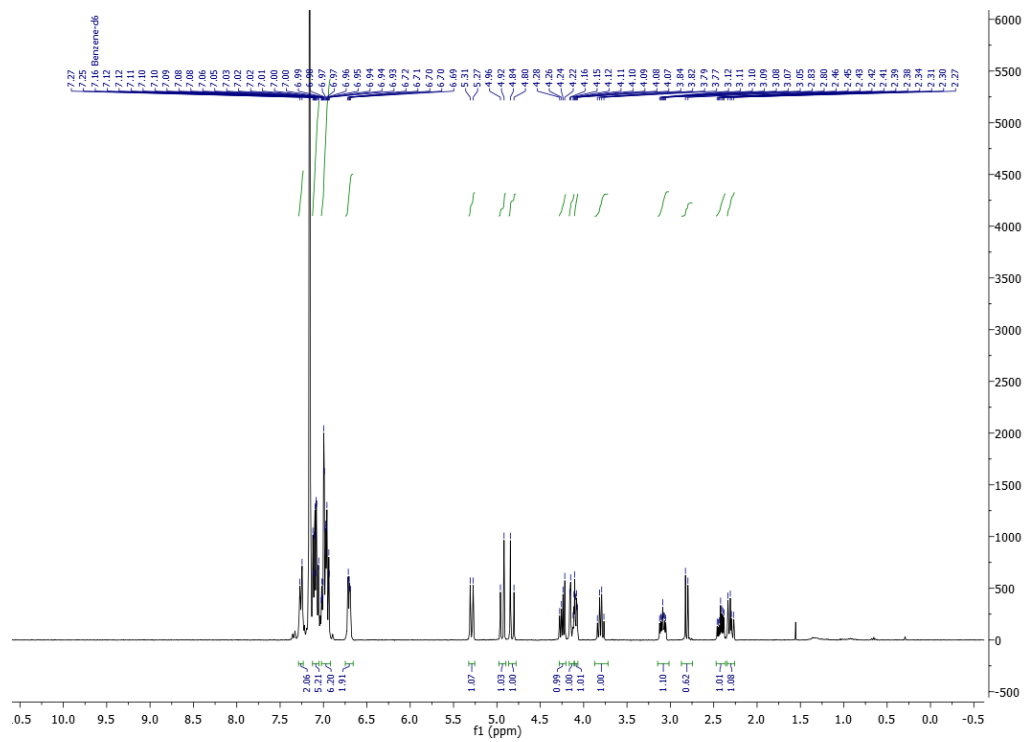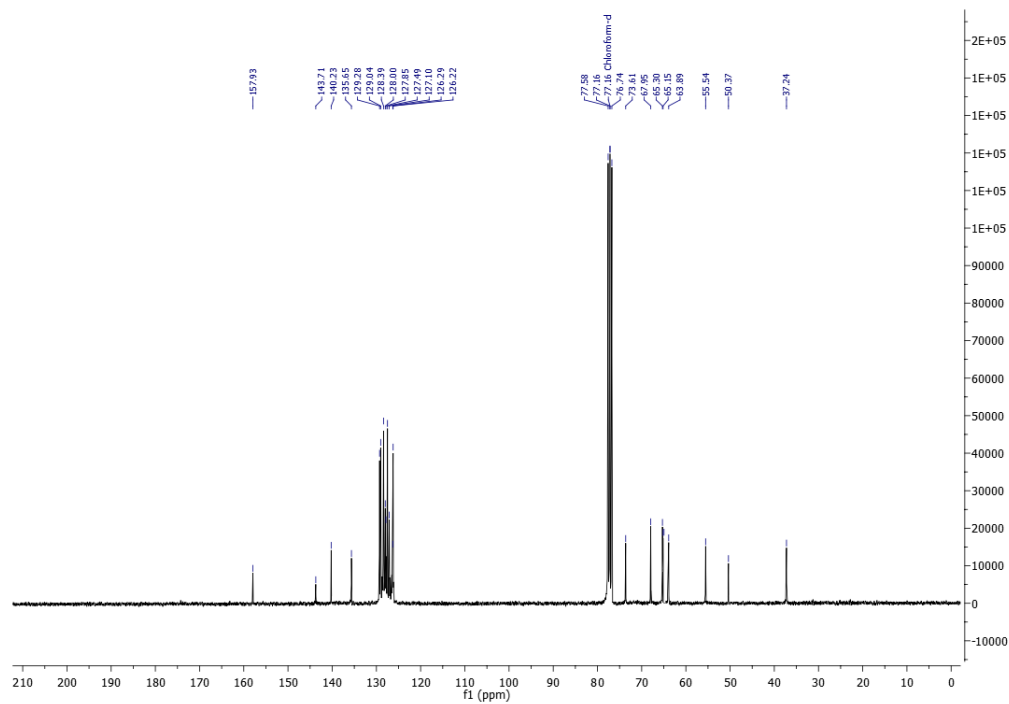

COSY spectrum:

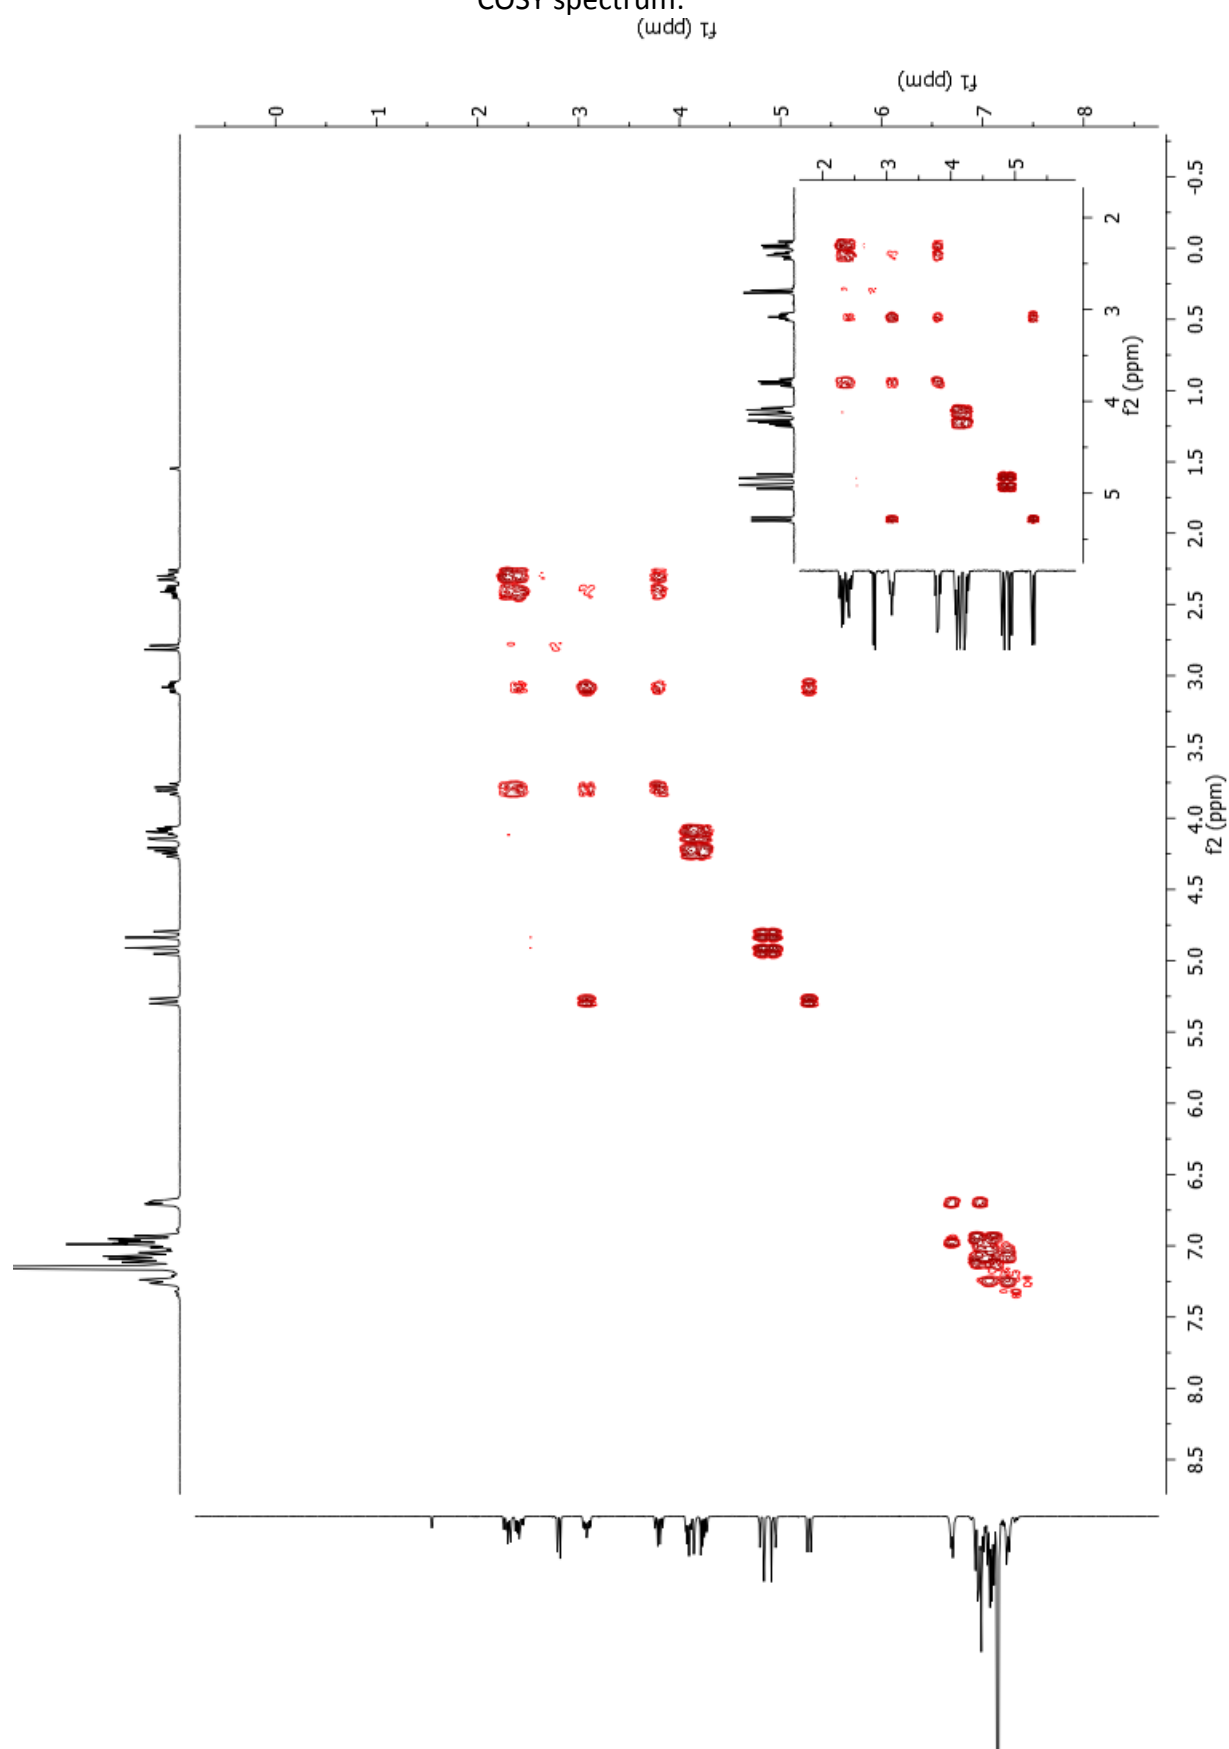

NOESY spectrum:

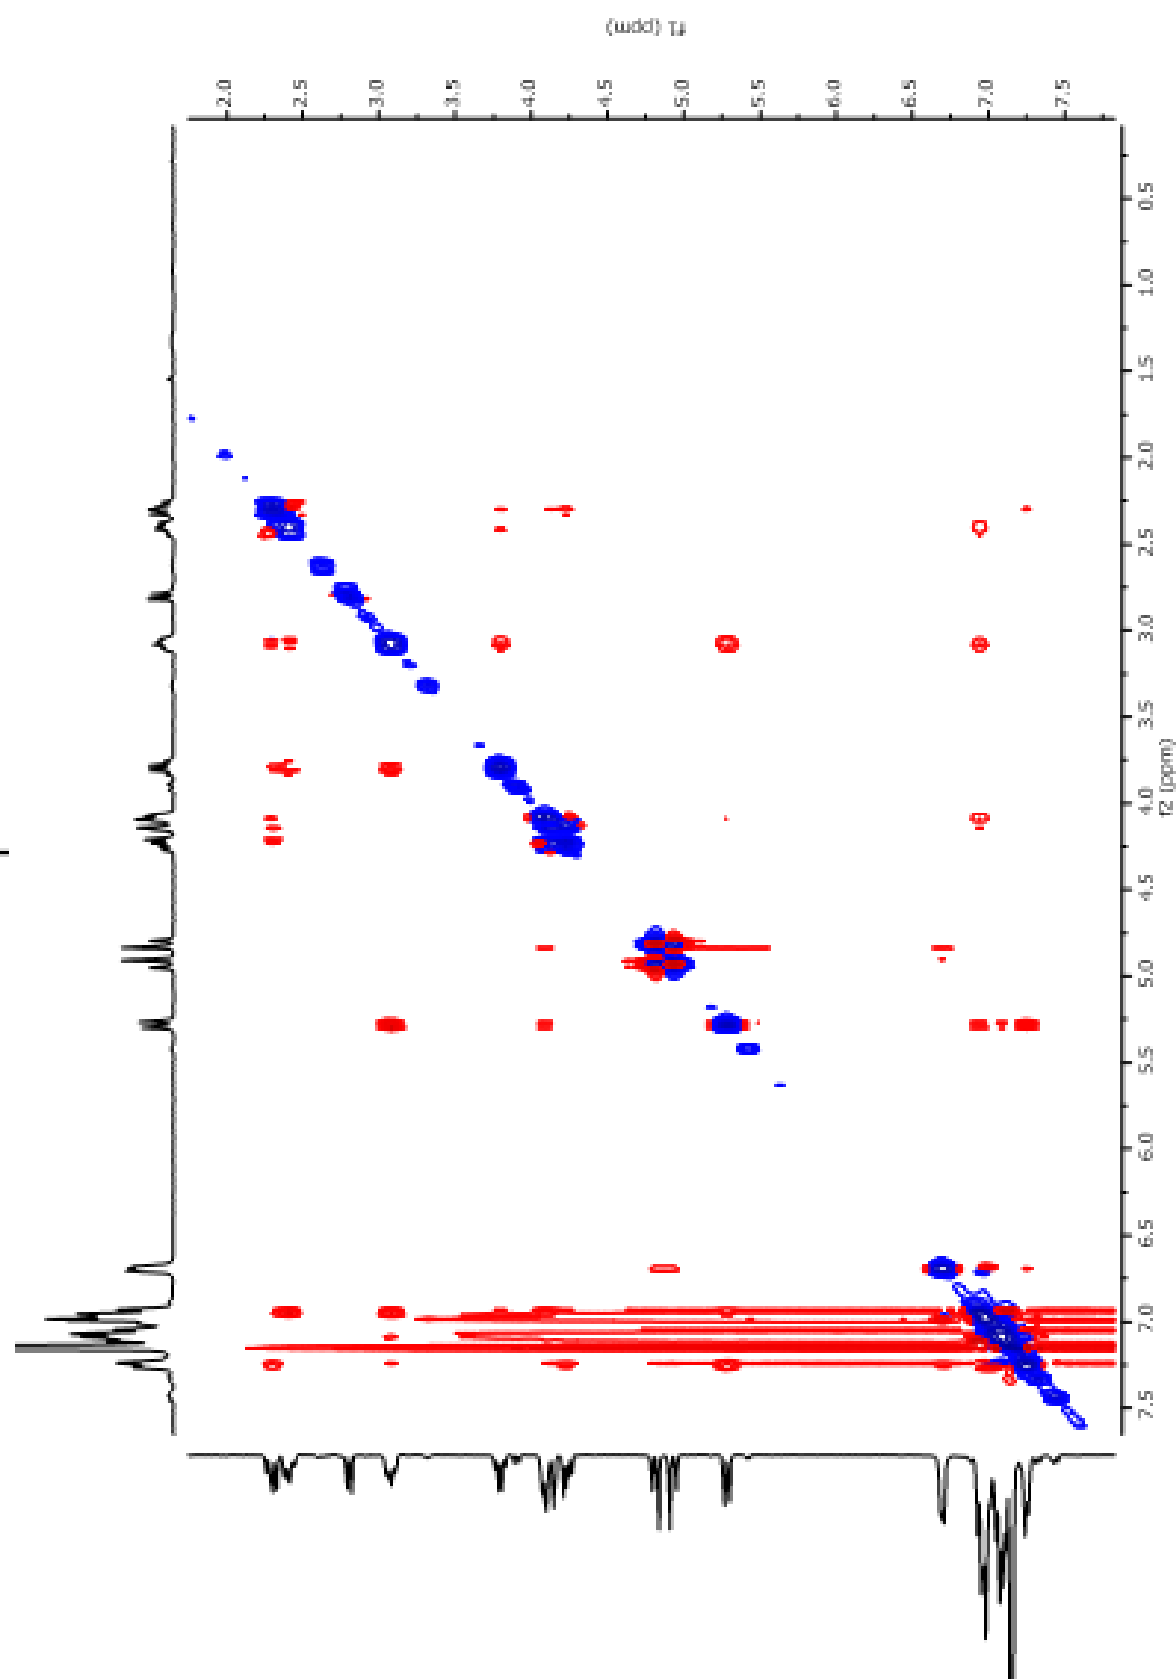

S60

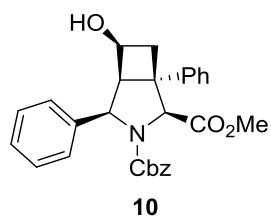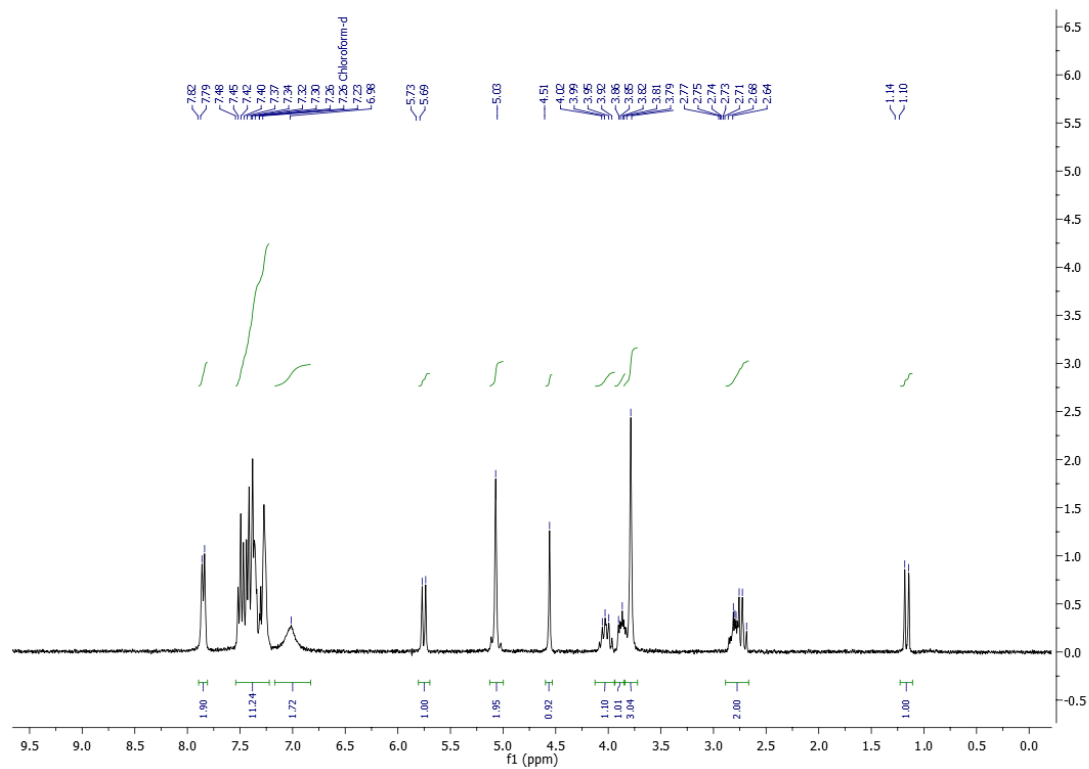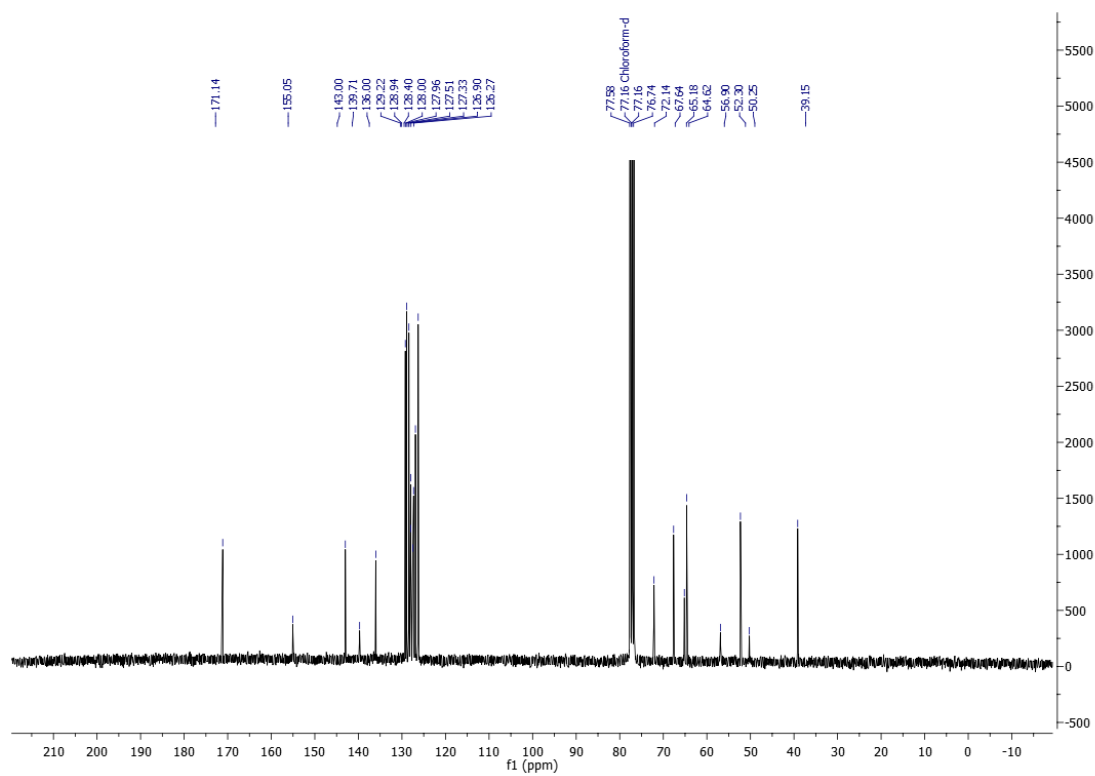

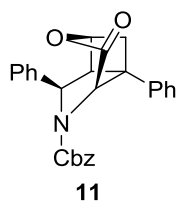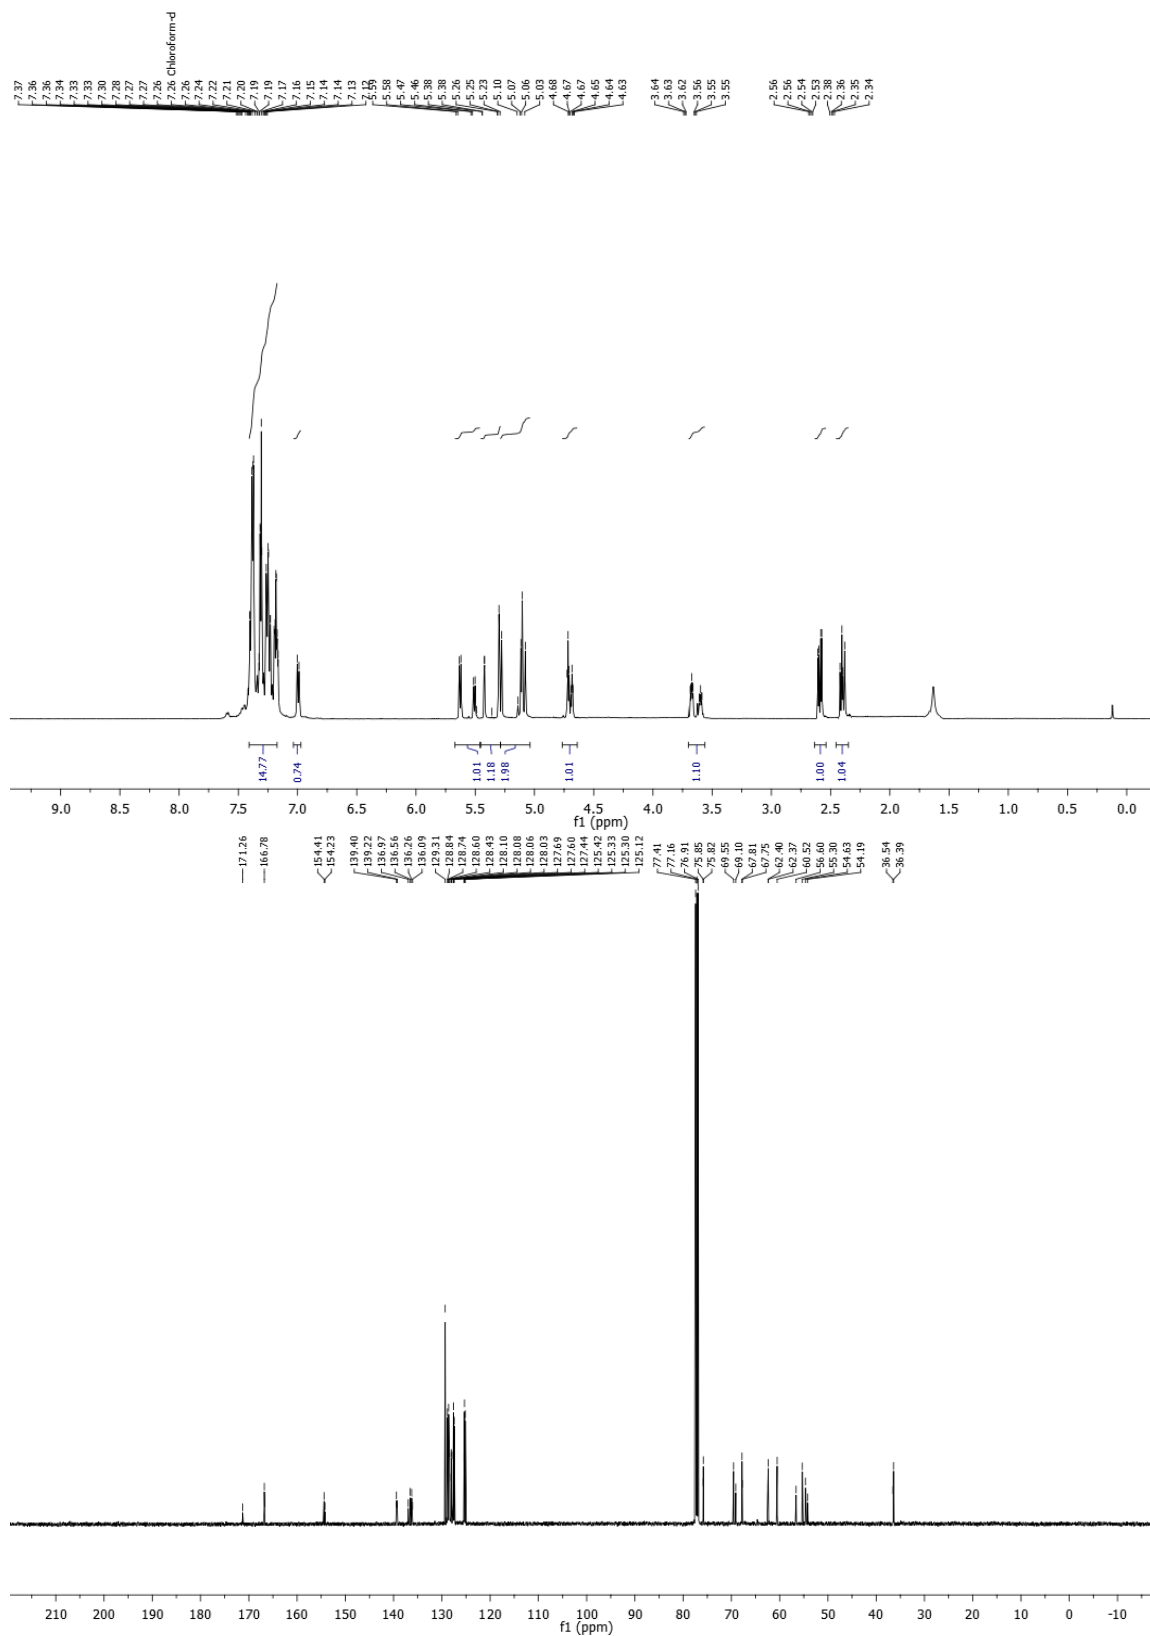

DEPT 135 spectrum:

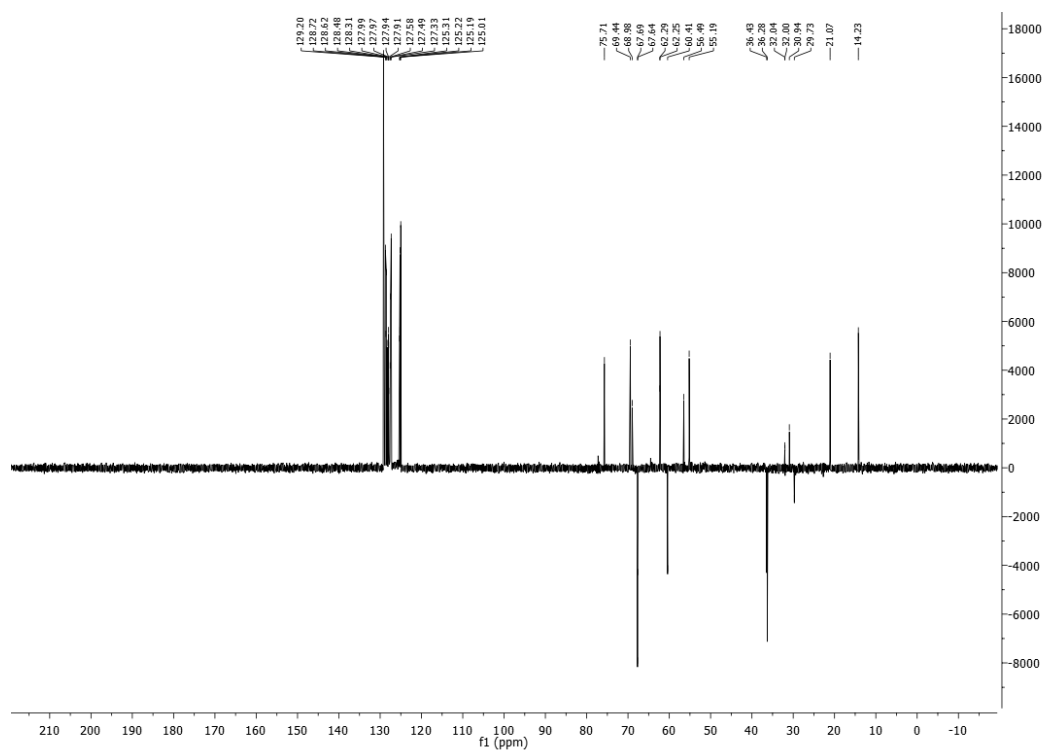

COSY spectrum:

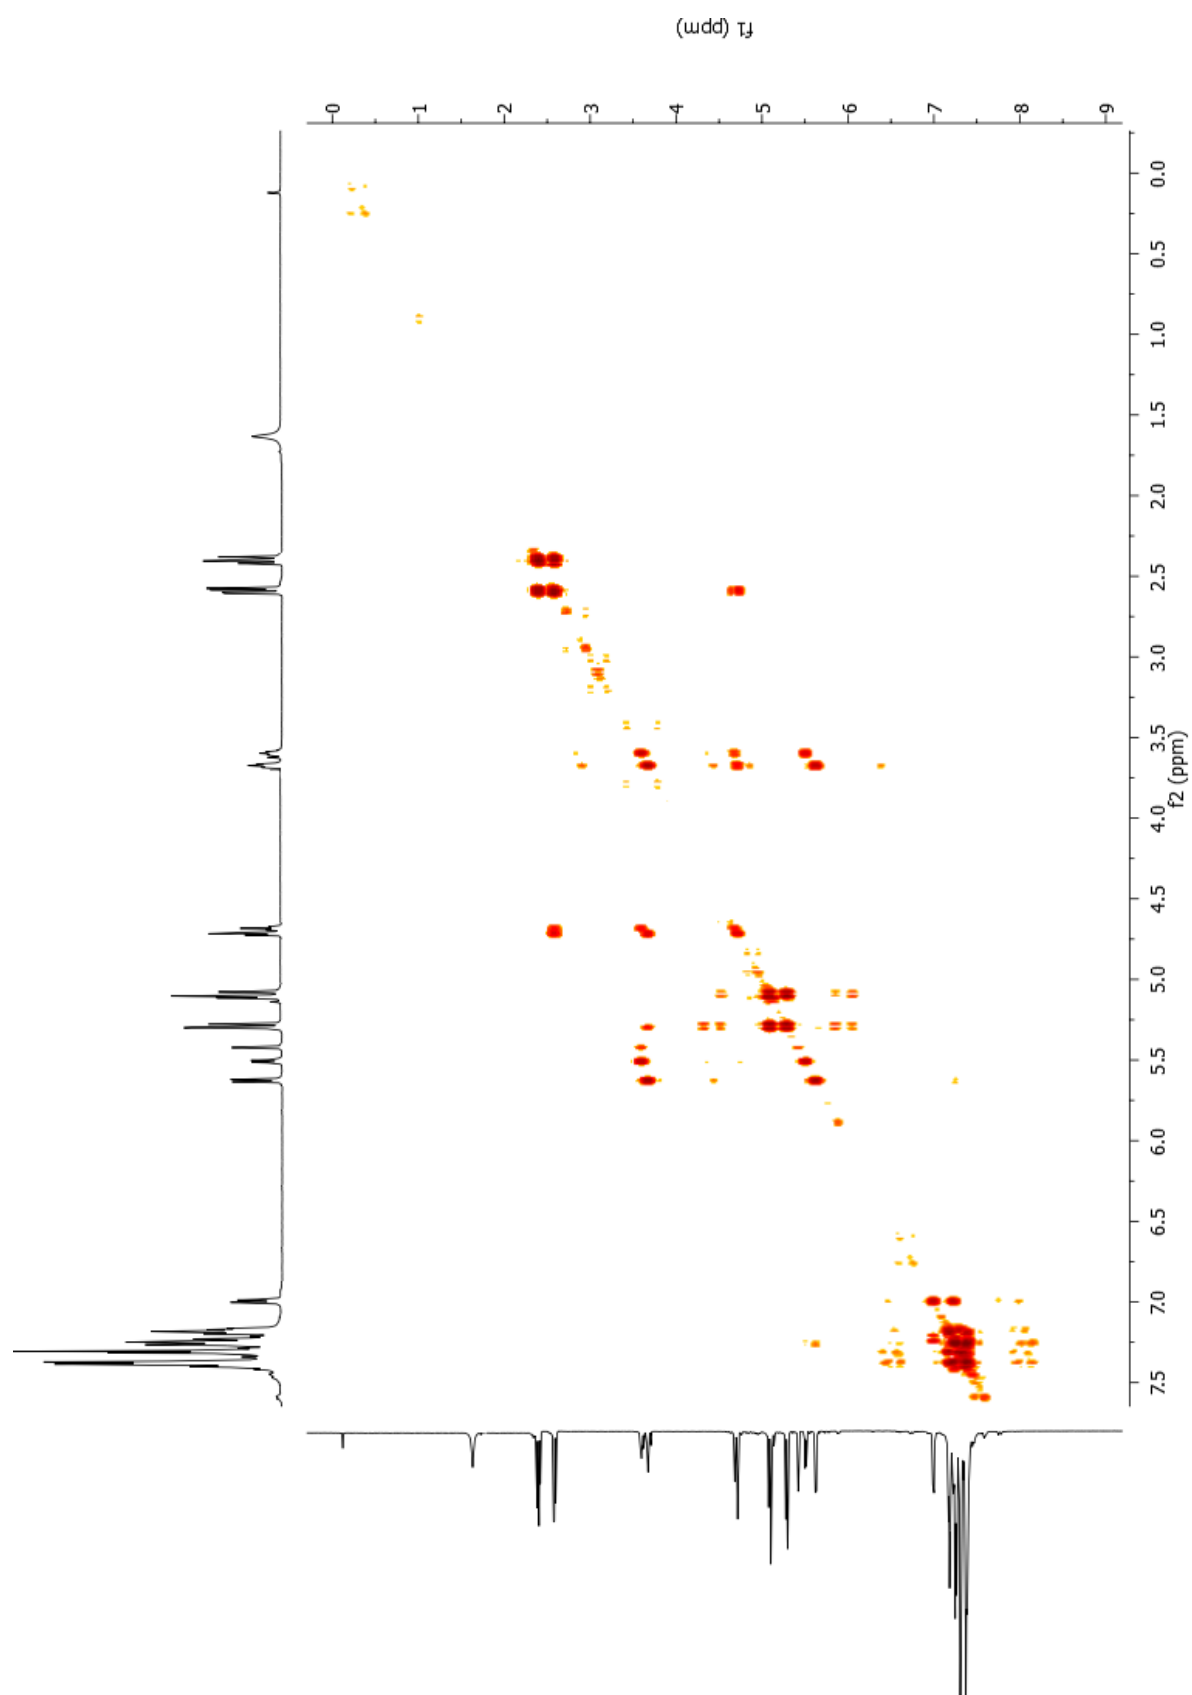

HMQC spectrum:

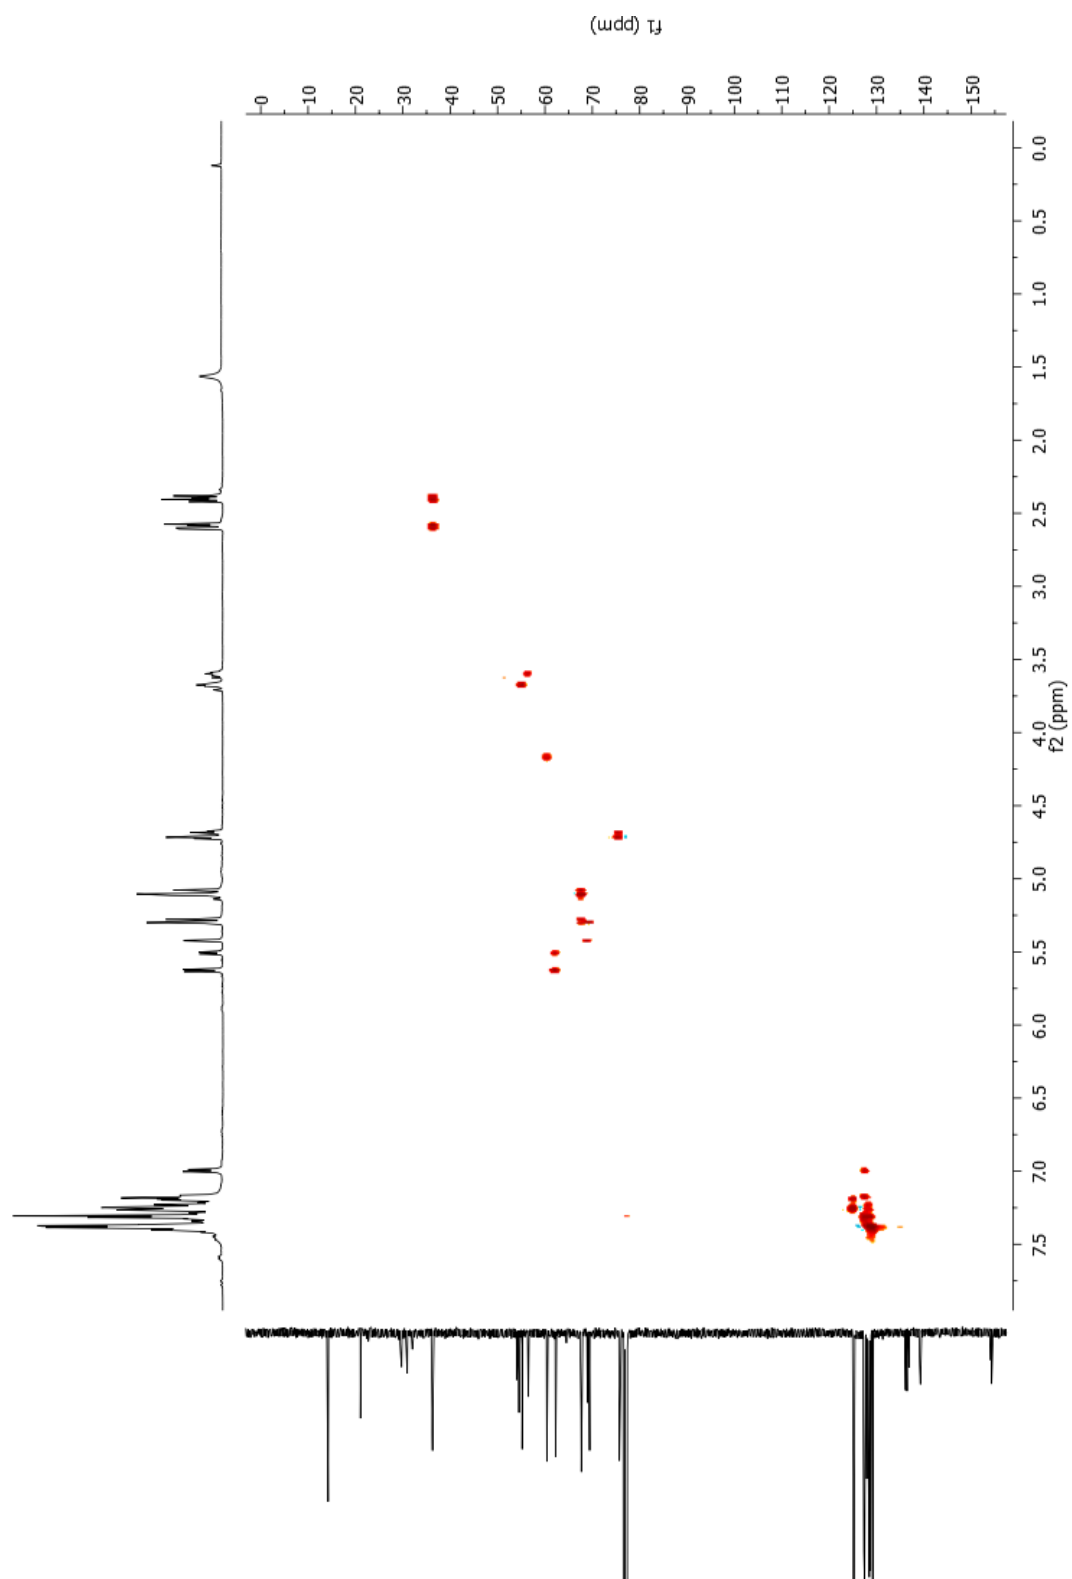



HMBC spectrum:

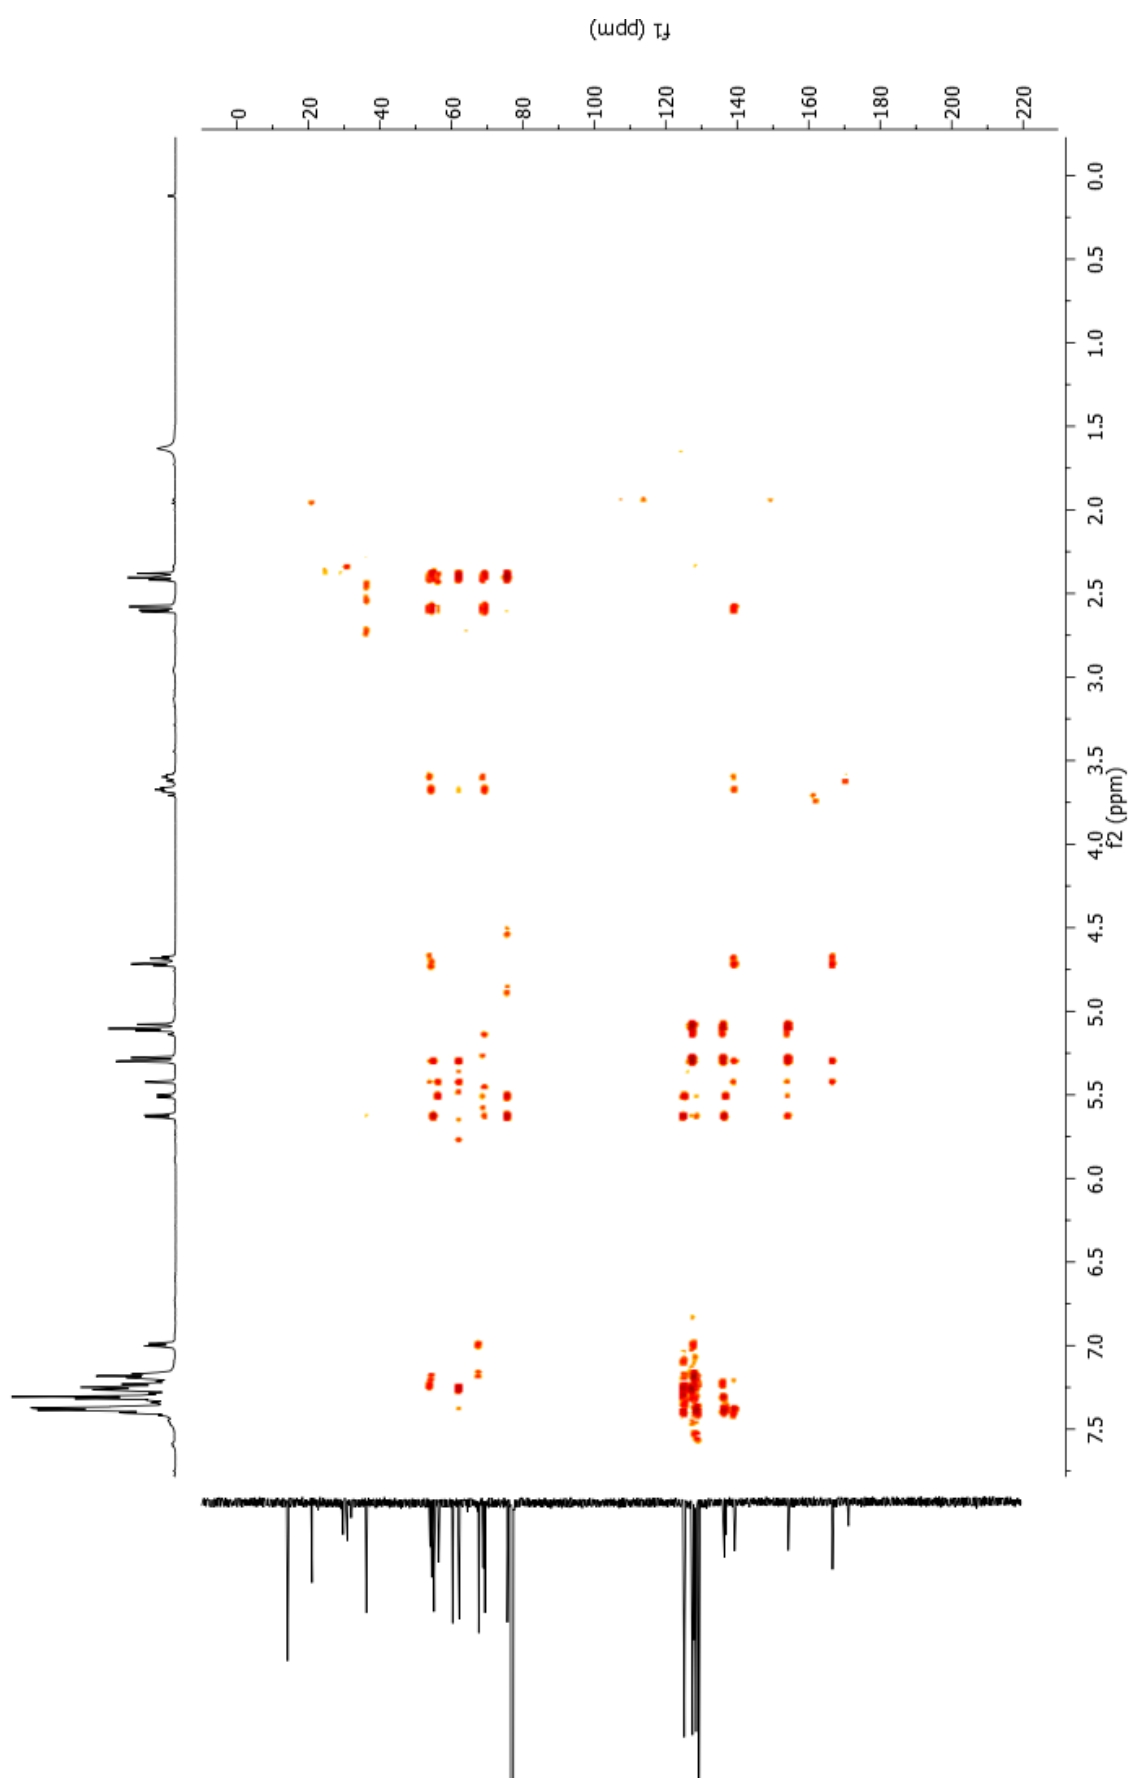

The existence of an equilibrium between rotamers was evidenced qualitatively from the performance of a 2D NOESY experiment of compound **12** in  $\text{CDCl}_3$  (see below). In addition to the signals corresponding to the nuclear Overhauser effect (nOe, indicated in yellow) strong peaks of cross between protons in equivalent equilibrium of a pair of rotamers were detected (peaks EXSY, indicated in blue). These two types of signals easily differentiate between them in the spectrum since they appear in different phases (positive peaks NOE, in yellow, negative peaks EXSY, in blue).<sup>4</sup>

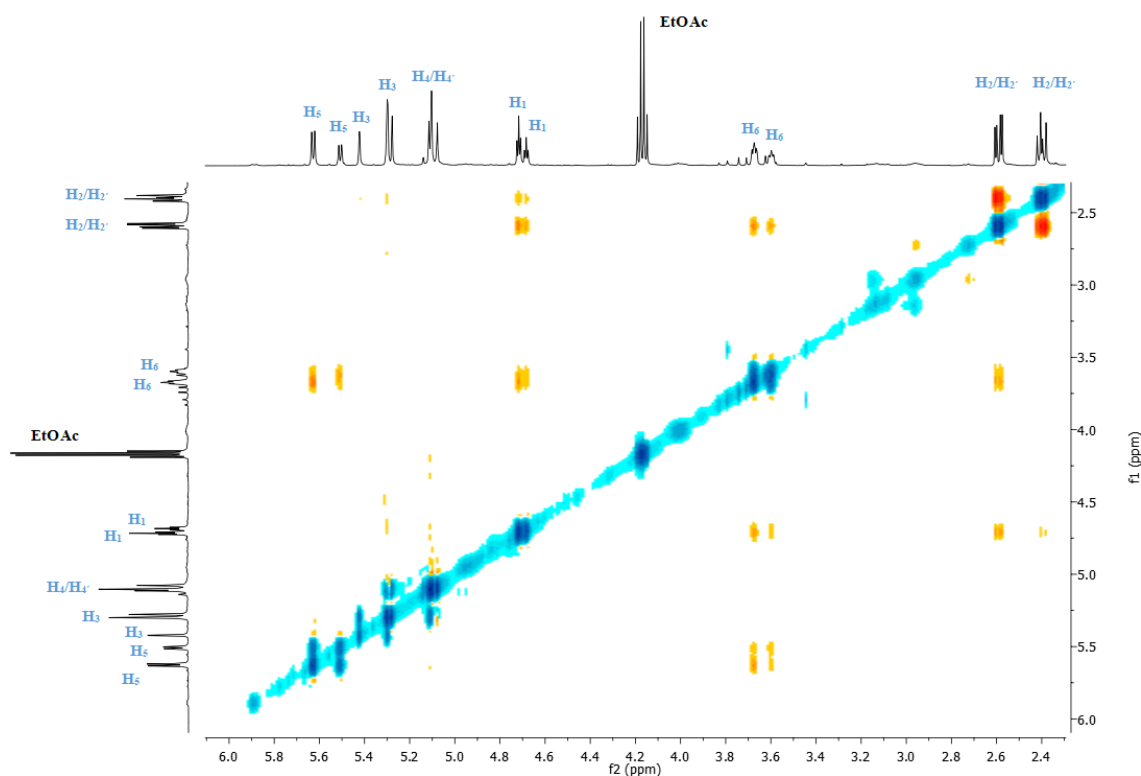

4. For other examples of the use of this technique for the discrimination between rotamers, see: Rayyan, S.; Fossen, T.; Solheim Nateland, H.; Andersen, M. *Phytochem. Anal.*, **2005**, *16*, 334 and references cited therein.
